# Supplementary material for: In Silico Screening of Semi-Synthesized Compounds as Potential Inhibitors for SARS-CoV-2 Papain-like Protease: Pharmacophoric Features, Molecular Docking, ADMET, Toxicity and DFT Studies
Source: MDPI journal article supplement (doi:10.3390/molecules26216593), 2021-10-30
Supplement: s1 [file s1]

***In silico* screening of semi synthesized compounds as potential inhibitors for SARS-CoV-2 papain-like protease: Pharmacophoric features, molecular docking, ADMET, toxicity, and DFT studies**

Mohamed S. Alesawy <sup>a</sup>, Eslam B. Elkaeed<sup>b</sup>, Aisha A. Als fouk<sup>c</sup>, Ahmed M. Metwaly<sup>d\*</sup>, Ibrahim. H. Eissa<sup>a\*</sup>

<sup>a</sup> Pharmaceutical Medicinal Chemistry & Drug Design Department, Faculty of Pharmacy (Boys), Al-Azhar University, Cairo 11884, Egypt.

<sup>b</sup> Department of Pharmaceutical Sciences, College of Pharmacy, Almaarefa University, Ad Diriyah 13713, Riyadh, Saudi Arabia.

<sup>c</sup> Department of Pharmaceutical Sciences, College of Pharmacy, Princess Nourah bint Abdulrahman University, Riyadh, Saudi Arabia.

<sup>d</sup> Pharmacognosy and Medicinal Plants Department, Faculty of Pharmacy (Boys), Al-Azhar University, Cairo 11884, Egypt.

**Content**

|                 |                  |
|-----------------|------------------|
| Method          | Docking studies  |
|                 | ADMET studies    |
|                 | Toxicity studies |
|                 | DFT studies      |
| Toxicity report |                  |

## Method

### 1- Docking studies

The title molecules were investigated with the aid of docking studies using MOE software for their binding capabilities against Papain-Like Protease (PLpro). The crystal structures of the target protein was acquired from the RCSB Protein Data Bank (PDB ID: 4OW0), resolution: 2.10 Å [4]. the co-crystallized ligands **S88** was used as reference molecules. Molecular Operating Environment (MOE) was used for the docking analysis. In these studies, the free energies, and binding modes of the tested molecules against target proteins were determined. At first, the water molecules were removed from the crystal structures of target proteins, retaining only one chain which is essential for binding. The Co-crystallized ligands were used as reference ligands. Then, the protein structures were protonated and the hydrogen atoms were hidden. Next, the energy was energy minimized by applying MMFF94x force field. After that, the binding pockets of each protein were defined. The structures of the examined compound and the co-crystallized ligands were drawn using ChemBioDraw Ultra 14.0 and saved as SDF formats. Then, the saved files were opened using MOE software and 3D structures were protonated. Next, the energy of the molecule was minimized applying MMFF94x force field. Validation processes were performed for each target receptor by running the docking process for only the co-crystallized ligand. low RMSD values between docked and crystal conformations indicate valid performance. The docking procedures were carried out utilizing a default protocol. In each case, 30 docked structures were generated using genetic algorithm searches. The output from MOE software was further analyzed and visualized using Discovery Studio 4.0 software

### 2- ADMET studies

ADMET descriptors (absorption, distribution, metabolism, excretion and toxicity) of the compounds were determined using Discovery studio 4.0. At first, the CHARMM force field was applied then the tested compounds were prepared and minimized according to the preparation of small molecule protocol. Then ADMET descriptors protocol was applied to carry out these studies.

### 3- Toxicity studies

The toxicity parameters of the tested compounds were calculated using Discovery studio 4.0. Indinavir was used as a reference drug. At first, the CHARMM force field was applied then the compounds were prepared and minimized according to the preparation of small molecule protocol. Then different parameters were calculated from the toxicity prediction (extensible) protocol.

#### **4- DFT studies:**

The DFT parameters (total energy, binding energy, HOMO, LUMO, gap energy, dipole moment, and electrostatic potential) were calculated using Discovery studio software. the tested compounds were prepared using prepare ligand protocol. Then, the prepared compounds were subjected to DFT calculation protocol using the default option.

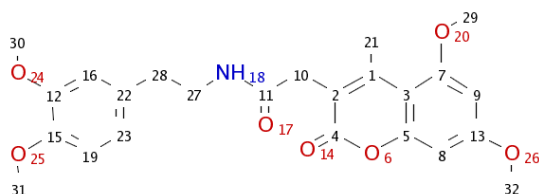

$C_{24}H_{27}NO_7$

Molecular Weight: 441.47368

ALogP: 3.388

Rotatable Bonds: 9

Acceptors: 7

Donors: 1

## Model Prediction

Prediction: Non-Carcinogen

Probability: 0.230

Enrichment: 0.719

Bayesian Score: -8.302

Prediction: Positive if the Bayesian score is above the estimated best cutoff value.

Probability: The estimated probability that the sample is in the category.

Enrichment: An estimate of enrichment, that is, the increased likelihood (versus random) of this sample being in the category.  
Bayesian Score: The standard Laplacian-modified Bayesian score.

## Structural Similar Compounds

| Name               | Nabumetone                                                          | Atenolol                                                            | Glyburide                                                           |
|--------------------|---------------------------------------------------------------------|---------------------------------------------------------------------|---------------------------------------------------------------------|
| Structure          |                                                                     |                                                                     |                                                                     |
| Actual Endpoint    | Non-Carcinogen                                                      | Non-Carcinogen                                                      | Non-Carcinogen                                                      |
| Predicted Endpoint | Non-Carcinogen                                                      | Non-Carcinogen                                                      | Non-Carcinogen                                                      |
| Similarity         | 0.395                                                               | 0.383                                                               | 0.375                                                               |
| Reference          | US FDA (Centre for Drug Eval.& Res./Off. Testing & Res.) Sept. 1997 | US FDA (Centre for Drug Eval.& Res./Off. Testing & Res.) Sept. 1997 | US FDA (Centre for Drug Eval.& Res./Off. Testing & Res.) Sept. 1997 |

## Model Applicability

Missing features are fingerprint features in the query molecule not found in the training set.

- Missing Feature: ECFP\_6 1792159373 [\*]C(=C(C)[c](:[\*]):[\*])[\*]

## Feature Contribution

| Top features for Carcinogen |            |                  |       |                            |
|-----------------------------|------------|------------------|-------|----------------------------|
| Fingerprint                 | Bit        | Structure/Smiles | Score | Carcinogen in training set |
| ECFP_6                      | -770854792 |                  | 0.617 | 2 out of 2                 |

| ECFP_6                          | -464490300  | 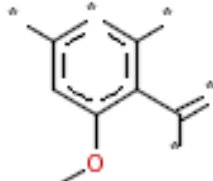   | 0.424  | 1 out of 1                 |
|---------------------------------|-------------|---------------------------------------------------------------------------------------|--------|----------------------------|
| ECFP_6                          | -1791034651 |    | 0.296  | 7 out of 16                |
| Top Features for Non-Carcinogen |             |                                                                                       |        |                            |
| Fingerprint                     | Bit         | Structure/Smiles                                                                      | Score  | Carcinogen in training set |
| ECFP_6                          | 2077607946  |    | -1.152 | 0 out of 7                 |
| ECFP_6                          | -468366781  |   | -0.805 | 0 out of 4                 |
| ECFP_6                          | 1731843802  |  | -0.657 | 0 out of 3                 |

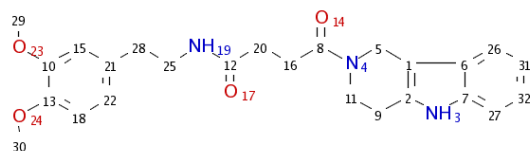
 $C_{25}H_{29}N_3O_4$ 

Molecular Weight: 435.51546

ALogP: 2.831

Rotatable Bonds: 8

Acceptors: 4

Donors: 2

## Model Prediction

Prediction: Non-Carcinogen

Probability: 0.243

Enrichment: 0.759

Bayesian Score: -9.274

Prediction: Positive if the Bayesian score is above the estimated best cutoff value.

Probability: The estimated probability that the sample is in the category.

Enrichment: An estimate of enrichment, that is, the increased likelihood (versus random) of this sample being in the category.

Bayesian Score: The standard Laplacian-modified Bayesian score.

## Structural Similar Compounds

| Name               | Reserpine                                                           | Pergolide                                                           | Etodolac                                                            |
|--------------------|---------------------------------------------------------------------|---------------------------------------------------------------------|---------------------------------------------------------------------|
| Structure          |                                                                     |                                                                     |                                                                     |
| Actual Endpoint    | Carcinogen                                                          | Carcinogen                                                          | Non-Carcinogen                                                      |
| Predicted Endpoint | Carcinogen                                                          | Carcinogen                                                          | Non-Carcinogen                                                      |
| Similarity         | 0.352                                                               | 0.303                                                               | 0.297                                                               |
| Reference          | US FDA (Centre for Drug Eval.& Res./Off. Testing & Res.) Sept. 1997 | US FDA (Centre for Drug Eval.& Res./Off. Testing & Res.) Sept. 1997 | US FDA (Centre for Drug Eval.& Res./Off. Testing & Res.) Sept. 1997 |

## Model Applicability

Missing features are fingerprint features in the query molecule not found in the training set.

- Missing Feature: ECFP\_6 979542842 [\*]C[c]1:n:[\*]:[\*]:[c]:1[\*]

## Feature Contribution

### Top features for Carcinogen

| Fingerprint | Bit      | Structure/Smiles | Score | Carcinogen in training set |
|-------------|----------|------------------|-------|----------------------------|
| ECFP_6      | 51876938 |                  | 0.473 | 16 out of 31               |

| ECFP_6                          | 246515844   | 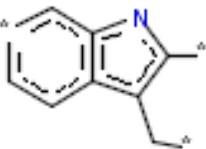   | 0.424  | 1 out of 1                 |
|---------------------------------|-------------|---------------------------------------------------------------------------------------|--------|----------------------------|
| ECFP_6                          | -1791034651 |    | 0.296  | 7 out of 16                |
| Top Features for Non-Carcinogen |             |                                                                                       |        |                            |
| Fingerprint                     | Bit         | Structure/Smiles                                                                      | Score  | Carcinogen in training set |
| ECFP_6                          | 2077607946  |    | -1.152 | 0 out of 7                 |
| ECFP_6                          | -1102925512 |  | -0.805 | 0 out of 4                 |
| ECFP_6                          | -468366781  |  | -0.805 | 0 out of 4                 |

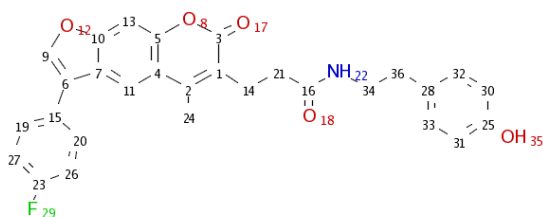

$C_{29}H_{24}FNO_5$

Molecular Weight: 485.50296

ALogP: 5.695

Rotatable Bonds: 7

Acceptors: 4

Donors: 2

## Model Prediction

Prediction: Carcinogen

Probability: 0.252

Enrichment: 0.787

Bayesian Score: 0.506

Prediction: Positive if the Bayesian score is above the estimated best cutoff value.

Probability: The estimated probability that the sample is in the category.

Enrichment: An estimate of enrichment, that is, the increased likelihood (versus random) of this sample being in the category.

Bayesian Score: The standard Laplacian-modified Bayesian score.

## Structural Similar Compounds

| Name               | Glyburide                                                           | Fluvastatin                                                         | Glimepride                                                          |
|--------------------|---------------------------------------------------------------------|---------------------------------------------------------------------|---------------------------------------------------------------------|
| Structure          |                                                                     |                                                                     |                                                                     |
| Actual Endpoint    | Non-Carcinogen                                                      | Non-Carcinogen                                                      | Carcinogen                                                          |
| Predicted Endpoint | Non-Carcinogen                                                      | Non-Carcinogen                                                      | Carcinogen                                                          |
| Similarity         | 0.357                                                               | 0.324                                                               | 0.319                                                               |
| Reference          | US FDA (Centre for Drug Eval.& Res./Off. Testing & Res.) Sept. 1997 | US FDA (Centre for Drug Eval.& Res./Off. Testing & Res.) Sept. 1997 | US FDA (Centre for Drug Eval.& Res./Off. Testing & Res.) Sept. 1997 |

## Model Applicability

Missing features are fingerprint features in the query molecule not found in the training set.

- Missing Feature: ECFP\_6 1792159373 [\*]C(=C(C)[c]([\*]):[\*])[\*]
- Missing Feature: ECFP\_6 -785659985 [\*][c]1:[\*]:[\*]:o:c:1

## Feature Contribution

| Top features for Carcinogen |            |                  |       |                            |
|-----------------------------|------------|------------------|-------|----------------------------|
| Fingerprint                 | Bit        | Structure/Smiles | Score | Carcinogen in training set |
| ECFP_6                      | 1419645508 |                  | 0.675 | 4 out of 5                 |



| ECFP_6                          | -770854792 | 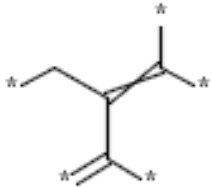   | 0.617  | 2 out of 2                 |
|---------------------------------|------------|---------------------------------------------------------------------------------------|--------|----------------------------|
| ECFP_6                          | -790637051 |    | 0.615  | 6 out of 9                 |
| Top Features for Non-Carcinogen |            |                                                                                       |        |                            |
| Fingerprint                     | Bit        | Structure/Smiles                                                                      | Score  | Carcinogen in training set |
| ECFP_6                          | -219423964 |    | -0.935 | 0 out of 5                 |
| ECFP_6                          | 1731843802 |  | -0.657 | 0 out of 3                 |
| ECFP_6                          | -427397688 |  | -0.476 | 5 out of 28                |

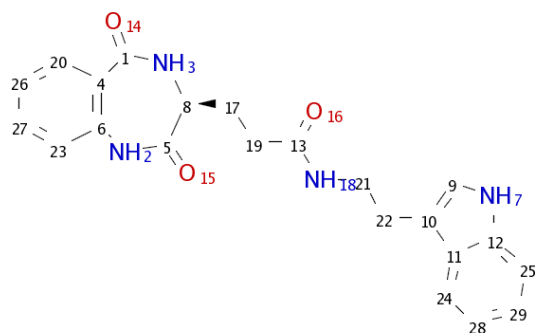

$C_{22}H_{22}N_4O_3$

Molecular Weight: 390.43508

ALogP: 1.807

Rotatable Bonds: 6

Acceptors: 3

Donors: 4

## Model Prediction

Prediction: Non-Carcinogen

Probability: 0.213

Enrichment: 0.664

Bayesian Score: -6.012

Prediction: Positive if the Bayesian score is above the estimated best cutoff value.

Probability: The estimated probability that the sample is in the category.

Enrichment: An estimate of enrichment, that is, the increased likelihood (versus random) of this sample being in the category.

Bayesian Score: The standard Laplacian-modified Bayesian score.

## Structural Similar Compounds

| Name               | Tryptophan                                                          | Prilocaine                                                          | Sumatriptan                                                         |
|--------------------|---------------------------------------------------------------------|---------------------------------------------------------------------|---------------------------------------------------------------------|
| Structure          |                                                                     |                                                                     |                                                                     |
| Actual Endpoint    | Non-Carcinogen                                                      | Carcinogen                                                          | Non-Carcinogen                                                      |
| Predicted Endpoint | Non-Carcinogen                                                      | Carcinogen                                                          | Non-Carcinogen                                                      |
| Similarity         | 0.440                                                               | 0.400                                                               | 0.375                                                               |
| Reference          | US FDA (Centre for Drug Eval.& Res./Off. Testing & Res.) Sept. 1997 | US FDA (Centre for Drug Eval.& Res./Off. Testing & Res.) Sept. 1997 | US FDA (Centre for Drug Eval.& Res./Off. Testing & Res.) Sept. 1997 |

## Model Applicability

Missing features are fingerprint features in the query molecule not found in the training set.

1. All descriptors are in range.

## Feature Contribution

### Top features for Carcinogen

| Fingerprint | Bit        | Structure/Smiles | Score | Carcinogen in training set |
|-------------|------------|------------------|-------|----------------------------|
| ECFP_6      | -953984246 |                  | 0.364 | 4 out of 8                 |

| ECFP_6                          | -1699286547 | 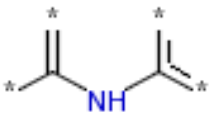   | 0.297  | 12 out of 28               |
|---------------------------------|-------------|---------------------------------------------------------------------------------------|--------|----------------------------|
| ECFP_6                          | -1791034651 |    | 0.296  | 7 out of 16                |
| Top Features for Non-Carcinogen |             |                                                                                       |        |                            |
| Fingerprint                     | Bit         | Structure/Smiles                                                                      | Score  | Carcinogen in training set |
| ECFP_6                          | -1659633832 |    | -0.657 | 0 out of 3                 |
| ECFP_6                          | 1731843802  |  | -0.657 | 0 out of 3                 |
| ECFP_6                          | -1613480181 |  | -0.482 | 0 out of 2                 |

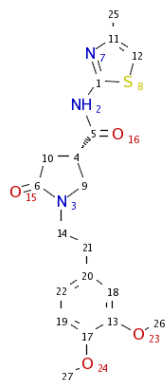

$C_{19}H_{23}N_3O_4S$

Molecular Weight: 389.46862

ALogP: 1.461

Rotatable Bonds: 7

Acceptors: 5

Donors: 1

## Model Prediction

Prediction: Non-Carcinogen

Probability: 0.221

Enrichment: 0.691

Bayesian Score: -7.417

Prediction: Positive if the Bayesian score is above the estimated best cutoff value.

Probability: The estimated probability that the sample is in the category.

Enrichment: An estimate of enrichment, that is, the increased likelihood (versus random) of this sample being in the category.

Bayesian Score: The standard Laplacian-modified Bayesian score.

## Structural Similar Compounds

| Name               | Sulfamethazine                                                      | Glipizide                                                           | Sulfadiazine                                                        |
|--------------------|---------------------------------------------------------------------|---------------------------------------------------------------------|---------------------------------------------------------------------|
| Structure          |                                                                     |                                                                     |                                                                     |
| Actual Endpoint    | Carcinogen                                                          | Non-Carcinogen                                                      | Non-Carcinogen                                                      |
| Predicted Endpoint | Carcinogen                                                          | Non-Carcinogen                                                      | Non-Carcinogen                                                      |
| Similarity         | 0.314                                                               | 0.295                                                               | 0.294                                                               |
| Reference          | US FDA (Centre for Drug Eval.& Res./Off. Testing & Res.) Sept. 1997 | US FDA (Centre for Drug Eval.& Res./Off. Testing & Res.) Sept. 1997 | US FDA (Centre for Drug Eval.& Res./Off. Testing & Res.) Sept. 1997 |

## Model Applicability

Missing features are fingerprint features in the query molecule not found in the training set.

1. Missing Feature: ECFP\_6 -1596132236 [\*]N[c]1:n:[\*]:[\*]:s:1
2. Missing Feature: ECFP\_6 -656741159 [\*]CN1C[\*][\*]C1=[\*]
3. Missing Feature: ECFP\_6 -857146788 [\*]C(=[\*])C1C[\*][\*]C1

## Feature Contribution

| Top features for Carcinogen |            |                  |       |                            |
|-----------------------------|------------|------------------|-------|----------------------------|
| Fingerprint                 | Bit        | Structure/Smiles | Score | Carcinogen in training set |
| ECFP_6                      | 2106656448 |                  | 0.254 | 31 out of 77               |

| ECFP_6                          | -1426923364 | 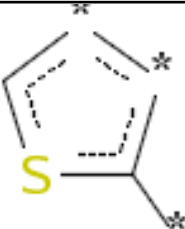    | 0.164  | 2 out of 5                 |
|---------------------------------|-------------|---------------------------------------------------------------------------------------|--------|----------------------------|
| ECFP_6                          | 914325265   |    | 0.127  | 4 out of 11                |
| Top Features for Non-Carcinogen |             |                                                                                       |        |                            |
| Fingerprint                     | Bit         | Structure/Smiles                                                                      | Score  | Carcinogen in training set |
| ECFP_6                          | 2077607946  |    | -1.152 | 0 out of 7                 |
| ECFP_6                          | -468366781  |   | -0.805 | 0 out of 4                 |
| ECFP_6                          | 1307307440  |  | -0.558 | 4 out of 25                |

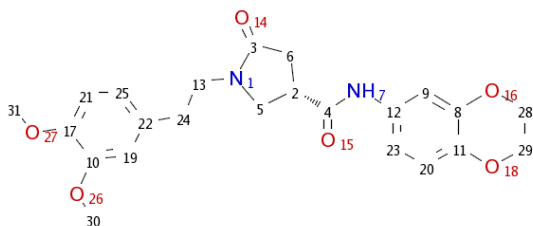

$C_{23}H_{26}N_2O_6$

Molecular Weight: 426.46234

ALogP: 1.967

Rotatable Bonds: 7

Acceptors: 6

Donors: 1

## Model Prediction

Prediction: Non-Carcinogen

Probability: 0.238

Enrichment: 0.741

Bayesian Score: -8.876

Prediction: Positive if the Bayesian score is above the estimated best cutoff value.

Probability: The estimated probability that the sample is in the category.

Enrichment: An estimate of enrichment, that is, the increased likelihood (versus random) of this sample being in the category.

Bayesian Score: The standard Laplacian-modified Bayesian score.

## Structural Similar Compounds

| Name               | Phenacetin                                                          | Nitroacetophenide                                                   | Carteolol                                                           |
|--------------------|---------------------------------------------------------------------|---------------------------------------------------------------------|---------------------------------------------------------------------|
| Structure          |                                                                     |                                                                     |                                                                     |
| Actual Endpoint    | Carcinogen                                                          | Non-Carcinogen                                                      | Non-Carcinogen                                                      |
| Predicted Endpoint | Carcinogen                                                          | Non-Carcinogen                                                      | Non-Carcinogen                                                      |
| Similarity         | 0.425                                                               | 0.409                                                               | 0.358                                                               |
| Reference          | US FDA (Centre for Drug Eval.& Res./Off. Testing & Res.) Sept. 1997 | US FDA (Centre for Drug Eval.& Res./Off. Testing & Res.) Sept. 1997 | US FDA (Centre for Drug Eval.& Res./Off. Testing & Res.) Sept. 1997 |

## Model Applicability

Missing features are fingerprint features in the query molecule not found in the training set.

- Missing Feature: ECFP\_6 -656741159 [\*]CN1C[\*][\*]C1=[\*]
- Missing Feature: ECFP\_6 -857146788 [\*]C(=[\*])C1C[\*][\*]C1

## Feature Contribution

| Top features for Carcinogen |           |                  |       |                            |
|-----------------------------|-----------|------------------|-------|----------------------------|
| Fingerprint                 | Bit       | Structure/Smiles | Score | Carcinogen in training set |
| ECFP_6                      | -91640731 |                  | 0.337 | 3 out of 6                 |

| ECFP_6                          | -177077903 | 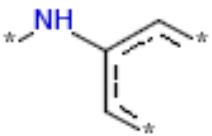   | 0.279  | 4 out of 9                 |
|---------------------------------|------------|---------------------------------------------------------------------------------------|--------|----------------------------|
| ECFP_6                          | 2106656448 |    | 0.254  | 31 out of 77               |
| Top Features for Non-Carcinogen |            |                                                                                       |        |                            |
| Fingerprint                     | Bit        | Structure/Smiles                                                                      | Score  | Carcinogen in training set |
| ECFP_6                          | 2077607946 |    | -1.152 | 0 out of 7                 |
| ECFP_6                          | -468366781 |   | -0.805 | 0 out of 4                 |
| ECFP_6                          | 1307307440 |  | -0.558 | 4 out of 25                |

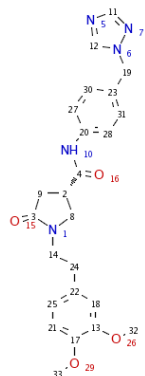

$C_{24}H_{27}N_5O_4$

Molecular Weight: 449.50228

ALogP: 1.731

Rotatable Bonds: 9

Acceptors: 6

Donors: 1

## Model Prediction

Prediction: Non-Carcinogen

Probability: 0.253

Enrichment: 0.791

Bayesian Score: -12.418

Prediction: Positive if the Bayesian score is above the estimated best cutoff value.

Probability: The estimated probability that the sample is in the category.

Enrichment: An estimate of enrichment, that is, the increased likelihood (versus random) of this sample being in the category.

Bayesian Score: The standard Laplacian-modified Bayesian score.

## Structural Similar Compounds

| Name               | Phenacetin                                                          | Nitroacetophenetide                                                 | Itraconazole                                                        |
|--------------------|---------------------------------------------------------------------|---------------------------------------------------------------------|---------------------------------------------------------------------|
| Structure          |                                                                     |                                                                     |                                                                     |
| Actual Endpoint    | Carcinogen                                                          | Non-Carcinogen                                                      | Non-Carcinogen                                                      |
| Predicted Endpoint | Carcinogen                                                          | Non-Carcinogen                                                      | Non-Carcinogen                                                      |
| Similarity         | 0.314                                                               | 0.309                                                               | 0.291                                                               |
| Reference          | US FDA (Centre for Drug Eval.& Res./Off. Testing & Res.) Sept. 1997 | US FDA (Centre for Drug Eval.& Res./Off. Testing & Res.) Sept. 1997 | US FDA (Centre for Drug Eval.& Res./Off. Testing & Res.) Sept. 1997 |

## Model Applicability

Missing features are fingerprint features in the query molecule not found in the training set.

1. Missing Feature: ECFP\_6 -656741159 [\*]CN1C[\*][\*]C1=[\*]
2. Missing Feature: ECFP\_6 -857146788 [\*]C(=[\*])C1C[\*][\*]C1

## Feature Contribution

| Top features for Carcinogen |           |                  |       |                            |
|-----------------------------|-----------|------------------|-------|----------------------------|
| Fingerprint                 | Bit       | Structure/Smiles | Score | Carcinogen in training set |
| ECFP_6                      | 738938915 |                  | 0.617 | 2 out of 2                 |



| ECFP_6                          | -177077903 |    | 0.279  | 4 out of 9                 |
|---------------------------------|------------|---------------------------------------------------------------------------------------|--------|----------------------------|
| ECFP_6                          | 2106656448 |    | 0.254  | 31 out of 77               |
| Top Features for Non-Carcinogen |            |                                                                                       |        |                            |
| Fingerprint                     | Bit        | Structure/Smiles                                                                      | Score  | Carcinogen in training set |
| ECFP_6                          | 2077607946 |    | -1.152 | 0 out of 7                 |
| ECFP_6                          | -468366781 |   | -0.805 | 0 out of 4                 |
| ECFP_6                          | 1307307440 |  | -0.558 | 4 out of 25                |

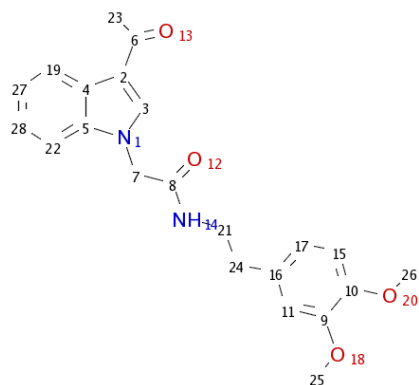

$C_{22}H_{24}N_2O_4$

Molecular Weight: 380.43696

ALogP: 3.001

Rotatable Bonds: 8

Acceptors: 4

Donors: 1

## Model Prediction

Prediction: Non-Carcinogen

Probability: 0.248

Enrichment: 0.775

Bayesian Score: -13.316

Prediction: Positive if the Bayesian score is above the estimated best cutoff value.

Probability: The estimated probability that the sample is in the category.

Enrichment: An estimate of enrichment, that is, the increased likelihood (versus random) of this sample being in the category.

Bayesian Score: The standard Laplacian-modified Bayesian score.

## Structural Similar Compounds

| Name               | Propafenone                                                         | Glyburide                                                           | Ondansetron                                                         |
|--------------------|---------------------------------------------------------------------|---------------------------------------------------------------------|---------------------------------------------------------------------|
| Structure          |                                                                     |                                                                     |                                                                     |
| Actual Endpoint    | Non-Carcinogen                                                      | Non-Carcinogen                                                      | Non-Carcinogen                                                      |
| Predicted Endpoint | Non-Carcinogen                                                      | Non-Carcinogen                                                      | Non-Carcinogen                                                      |
| Similarity         | 0.345                                                               | 0.344                                                               | 0.333                                                               |
| Reference          | US FDA (Centre for Drug Eval.& Res./Off. Testing & Res.) Sept. 1997 | US FDA (Centre for Drug Eval.& Res./Off. Testing & Res.) Sept. 1997 | US FDA (Centre for Drug Eval.& Res./Off. Testing & Res.) Sept. 1997 |

## Model Applicability

Missing features are fingerprint features in the query molecule not found in the training set.

- Missing Feature: ECFP\_6 499043293 [\*]C(=[\*])Cn(:[\*]):[\*]

## Feature Contribution

### Top features for Carcinogen

| Fingerprint | Bit         | Structure/Smiles | Score | Carcinogen in training set |
|-------------|-------------|------------------|-------|----------------------------|
| ECFP_6      | -1791034651 |                  | 0.296 | 7 out of 16                |

| ECFP_6                          | 1527623780 | 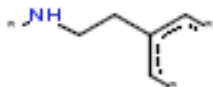   | 0.164  | 2 out of 5                 |
|---------------------------------|------------|---------------------------------------------------------------------------------------|--------|----------------------------|
| ECFP_6                          | -182236392 |    | 0.048  | 89 out of 274              |
| Top Features for Non-Carcinogen |            |                                                                                       |        |                            |
| Fingerprint                     | Bit        | Structure/Smiles                                                                      | Score  | Carcinogen in training set |
| ECFP_6                          | 2077607946 |    | -1.152 | 0 out of 7                 |
| ECFP_6                          | 1334415134 |   | -0.935 | 0 out of 5                 |
| ECFP_6                          | -468366781 |  | -0.805 | 0 out of 4                 |

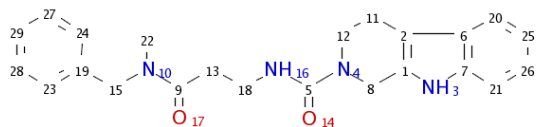

$C_{23}H_{26}N_4O_2$

Molecular Weight: 390.47814

ALogP: 2.702

Rotatable Bonds: 5

Acceptors: 2

Donors: 2

## Model Prediction

Prediction: Non-Carcinogen

Probability: 0.214

Enrichment: 0.669

Bayesian Score: -2.945

Prediction: Positive if the Bayesian score is above the estimated best cutoff value.

Probability: The estimated probability that the sample is in the category.

Enrichment: An estimate of enrichment, that is, the increased likelihood (versus random) of this sample being in the category.

Bayesian Score: The standard Laplacian-modified Bayesian score.

## Structural Similar Compounds

| Name               | Etodolac                                                            | Tryptophan                                                          | Glimepride                                                          |
|--------------------|---------------------------------------------------------------------|---------------------------------------------------------------------|---------------------------------------------------------------------|
| Structure          |                                                                     |                                                                     |                                                                     |
| Actual Endpoint    | Non-Carcinogen                                                      | Non-Carcinogen                                                      | Carcinogen                                                          |
| Predicted Endpoint | Non-Carcinogen                                                      | Non-Carcinogen                                                      | Carcinogen                                                          |
| Similarity         | 0.368                                                               | 0.340                                                               | 0.297                                                               |
| Reference          | US FDA (Centre for Drug Eval.& Res./Off. Testing & Res.) Sept. 1997 | US FDA (Centre for Drug Eval.& Res./Off. Testing & Res.) Sept. 1997 | US FDA (Centre for Drug Eval.& Res./Off. Testing & Res.) Sept. 1997 |

## Model Applicability

Missing features are fingerprint features in the query molecule not found in the training set.

- Missing Feature: ECFP\_6 979542842 [\*]C[c]1:n:[\*]:[\*]:[c]:1[\*]
- Missing Feature: ECFP\_6 -1022383729 [\*]CN(C)C(=[\*])[\*]

## Feature Contribution

| Top features for Carcinogen |          |                  |       |                            |
|-----------------------------|----------|------------------|-------|----------------------------|
| Fingerprint                 | Bit      | Structure/Smiles | Score | Carcinogen in training set |
| ECFP_6                      | 51876938 |                  | 0.473 | 16 out of 31               |

| ECFP_6                          | 246515844   | 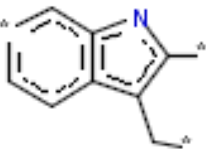   | 0.424  | 1 out of 1                 |
|---------------------------------|-------------|---------------------------------------------------------------------------------------|--------|----------------------------|
| ECFP_6                          | 1657836083  |    | 0.424  | 1 out of 1                 |
| Top Features for Non-Carcinogen |             |                                                                                       |        |                            |
| Fingerprint                     | Bit         | Structure/Smiles                                                                      | Score  | Carcinogen in training set |
| ECFP_6                          | -1102925512 |    | -0.805 | 0 out of 4                 |
| ECFP_6                          | -43933357   |   | -0.657 | 0 out of 3                 |
| ECFP_6                          | -426213989  |  | -0.482 | 0 out of 2                 |

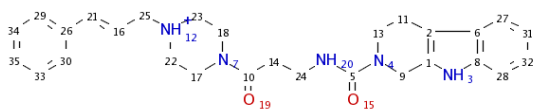

$C_{28}H_{34}N_5O_2$

Molecular Weight: 472.60186

ALogP: 1.567

Rotatable Bonds: 6

Acceptors: 2

Donors: 3

## Model Prediction

**Prediction: Carcinogen**

Probability: 0.244

Enrichment: 0.760

Bayesian Score: -0.029

Prediction: Positive if the Bayesian score is above the estimated best cutoff value.

Probability: The estimated probability that the sample is in the category.

Enrichment: An estimate of enrichment, that is, the increased likelihood (versus random) of this sample being in the category.

Bayesian Score: The standard Laplacian-modified Bayesian score.

## Structural Similar Compounds

| Name               | Etodolac                                                            | Tryptophan                                                          | Bromocriptine                                                       |
|--------------------|---------------------------------------------------------------------|---------------------------------------------------------------------|---------------------------------------------------------------------|
| Structure          |                                                                     |                                                                     |                                                                     |
| Actual Endpoint    | Non-Carcinogen                                                      | Non-Carcinogen                                                      | Non-Carcinogen                                                      |
| Predicted Endpoint | Non-Carcinogen                                                      | Non-Carcinogen                                                      | Non-Carcinogen                                                      |
| Similarity         | 0.333                                                               | 0.286                                                               | 0.272                                                               |
| Reference          | US FDA (Centre for Drug Eval.& Res./Off. Testing & Res.) Sept. 1997 | US FDA (Centre for Drug Eval.& Res./Off. Testing & Res.) Sept. 1997 | US FDA (Centre for Drug Eval.& Res./Off. Testing & Res.) Sept. 1997 |

## Model Applicability

Missing features are fingerprint features in the query molecule not found in the training set.

1. Missing Feature: ECFP\_6 1976330679  $[*][NH+]([*])[*]$
2. Missing Feature: ECFP\_6 979542842  $[*]C[c]1:n:[*]:[*]:[c]:1[*]$
3. Missing Feature: ECFP\_6 1133499173  $[*]C[NH+](C[*])C[*]$
4. Missing Feature: ECFP\_6 -244159614  $[*]CC[NH+]([*])[*]$
5. Missing Feature: ECFP\_6 474483418  $[*][NH+]([*])CC=[*]$
6. Missing Feature: ECFP\_6 -176483725  $[*]=C[c](c:[*]):c:[*]$

## Feature Contribution

| Top features for Carcinogen |          |                  |       |                            |
|-----------------------------|----------|------------------|-------|----------------------------|
| Fingerprint                 | Bit      | Structure/Smiles | Score | Carcinogen in training set |
| ECFP_6                      | 51876938 |                  | 0.473 | 16 out of 31               |

| ECFP_6                          | -97048906   |    | 0.442  | 2 out of 3                 |
|---------------------------------|-------------|---------------------------------------------------------------------------------------|--------|----------------------------|
| ECFP_6                          | 477797263   |    | 0.424  | 1 out of 1                 |
| Top Features for Non-Carcinogen |             |                                                                                       |        |                            |
| Fingerprint                     | Bit         | Structure/Smiles                                                                      | Score  | Carcinogen in training set |
| ECFP_6                          | -1831055759 |    | -0.805 | 0 out of 4                 |
| ECFP_6                          | -1102925512 |  | -0.805 | 0 out of 4                 |
| ECFP_6                          | -1789102870 |  | -0.384 | 2 out of 11                |

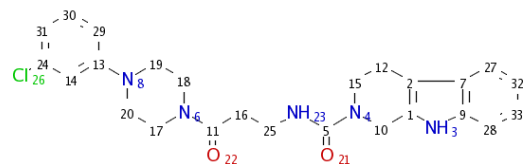

$C_{25}H_{28}ClN_5O_2$

Molecular Weight: 465.97512

ALogP: 3.413

Rotatable Bonds: 4

Acceptors: 3

Donors: 2

## Model Prediction

Prediction: Non-Carcinogen

Probability: 0.264

Enrichment: 0.823

Bayesian Score: -10.443

Prediction: Positive if the Bayesian score is above the estimated best cutoff value.

Probability: The estimated probability that the sample is in the category.

Enrichment: An estimate of enrichment, that is, the increased likelihood (versus random) of this sample being in the category.

Bayesian Score: The standard Laplacian-modified Bayesian score.

## Structural Similar Compounds

| Name               | Temazepam                                                           | Diazepam                                                            | Ketoconazole                                                        |
|--------------------|---------------------------------------------------------------------|---------------------------------------------------------------------|---------------------------------------------------------------------|
| Structure          |                                                                     |                                                                     |                                                                     |
| Actual Endpoint    | Non-Carcinogen                                                      | Carcinogen                                                          | Non-Carcinogen                                                      |
| Predicted Endpoint | Non-Carcinogen                                                      | Non-Carcinogen                                                      | Non-Carcinogen                                                      |
| Similarity         | 0.339                                                               | 0.328                                                               | 0.312                                                               |
| Reference          | US FDA (Centre for Drug Eval.& Res./Off. Testing & Res.) Sept. 1997 | US FDA (Centre for Drug Eval.& Res./Off. Testing & Res.) Sept. 1997 | US FDA (Centre for Drug Eval.& Res./Off. Testing & Res.) Sept. 1997 |

## Model Applicability

Missing features are fingerprint features in the query molecule not found in the training set.

- Missing Feature: ECFP\_6 979542842 [\*]C[c]1:n:[\*]:[\*]:[c]:1[\*]

## Feature Contribution

| Top features for Carcinogen |          |                  |       |                            |
|-----------------------------|----------|------------------|-------|----------------------------|
| Fingerprint                 | Bit      | Structure/Smiles | Score | Carcinogen in training set |
| ECFP_6                      | 51876938 |                  | 0.473 | 16 out of 31               |



| ECFP_6                          | 246515844   | 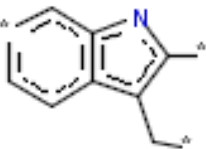   | 0.424  | 1 out of 1                 |
|---------------------------------|-------------|---------------------------------------------------------------------------------------|--------|----------------------------|
| ECFP_6                          | 477797263   |    | 0.424  | 1 out of 1                 |
| Top Features for Non-Carcinogen |             |                                                                                       |        |                            |
| Fingerprint                     | Bit         | Structure/Smiles                                                                      | Score  | Carcinogen in training set |
| ECFP_6                          | 342267039   |    | -1.152 | 0 out of 7                 |
| ECFP_6                          | -175021654  |   | -0.805 | 0 out of 4                 |
| ECFP_6                          | -1102925512 |  | -0.805 | 0 out of 4                 |

## MOST ACTIVE.mol

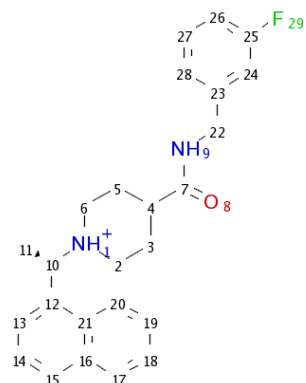

$C_{25}H_{28}FN_2O$

Molecular Weight: 391.50102

ALogP: 3.098

Rotatable Bonds: 5

Acceptors: 1

Donors: 2

### Model Prediction

**Prediction: Carcinogen**

Probability: 0.248

Enrichment: 0.775

Bayesian Score: 0.272

Prediction: Positive if the Bayesian score is above the estimated best cutoff value.

Probability: The estimated probability that the sample is in the category.

Enrichment: An estimate of enrichment, that is, the increased likelihood (versus random) of this sample being in the category.

Bayesian Score: The standard Laplacian-modified Bayesian score.

## TOPKAT\_Mouse\_Female\_FDA\_None\_vs\_Carcinogen

### Structural Similar Compounds

| Name               | Bupropion                                                           | Chlorpropamide                                                      | Phenobarbital                                                       |
|--------------------|---------------------------------------------------------------------|---------------------------------------------------------------------|---------------------------------------------------------------------|
| Structure          |                                                                     |                                                                     |                                                                     |
| Actual Endpoint    | Non-Carcinogen                                                      | Non-Carcinogen                                                      | Carcinogen                                                          |
| Predicted Endpoint | Non-Carcinogen                                                      | Non-Carcinogen                                                      | Carcinogen                                                          |
| Similarity         | 0.362                                                               | 0.327                                                               | 0.311                                                               |
| Reference          | US FDA (Centre for Drug Eval.& Res./Off. Testing & Res.) Sept. 1997 | US FDA (Centre for Drug Eval.& Res./Off. Testing & Res.) Sept. 1997 | US FDA (Centre for Drug Eval.& Res./Off. Testing & Res.) Sept. 1997 |

### Model Applicability

Missing features are fingerprint features in the query molecule not found in the training set.

1. Missing Feature: ECFP\_6 1976330679  $[*][NH+]([*])[*]$
2. Missing Feature: ECFP\_6 2070272975  $[*]C[NH+](C[*])C([*])[*]$
3. Missing Feature: ECFP\_6 -244159614  $[*]CC[NH+]([*])[*]$
4. Missing Feature: ECFP\_6 -857146788  $[*]C(=[*])C1C[*][*]C1$
5. Missing Feature: ECFP\_6 -1670638661  $[*][NH+]([*])[C@H](C)[c]([*]):[*]$

### Feature Contribution

| Top features for Carcinogen |           |                  |       |                            |
|-----------------------------|-----------|------------------|-------|----------------------------|
| Fingerprint                 | Bit       | Structure/Smiles | Score | Carcinogen in training set |
| ECFP_6                      | 769925792 |                  | 0.617 | 2 out of 2                 |

| ECFP_6                          | -81428579   | 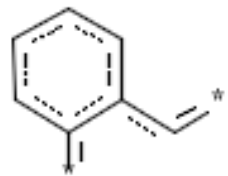   | 0.581  | 3 out of 4                 |
|---------------------------------|-------------|---------------------------------------------------------------------------------------|--------|----------------------------|
| ECFP_6                          | -178525456  |    | 0.457  | 4 out of 7                 |
| Top Features for Non-Carcinogen |             |                                                                                       |        |                            |
| Fingerprint                     | Bit         | Structure/Smiles                                                                      | Score  | Carcinogen in training set |
| ECFP_6                          | 2007300961  |    | -0.652 | 5 out of 34                |
| ECFP_6                          | -81134287   |  | -0.482 | 0 out of 2                 |
| ECFP_6                          | -1910270391 |  | -0.307 | 20 out of 89               |

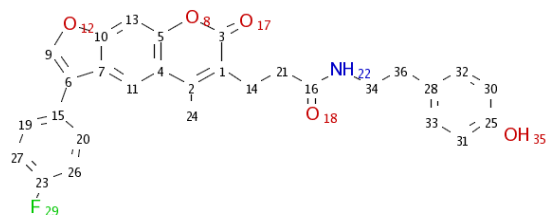

$C_{29}H_{24}FNO_5$

Molecular Weight: 485.50296

ALogP: 5.695

Rotatable Bonds: 7

Acceptors: 4

Donors: 2

## Model Prediction

**Prediction: Multiple-Carcinogen**

Probability: 0.628

Enrichment: 1.531

Bayesian Score: 4.779

Prediction: Positive if the Bayesian score is above the estimated best cutoff value.

Probability: The estimated probability that the sample is in the category.

Enrichment: An estimate of enrichment, that is, the increased likelihood (versus random) of this sample being in the category.

Bayesian Score: The standard Laplacian-modified Bayesian score.

## Structural Similar Compounds

| Name               | Glimepiride                                                         | Salmeterol                                                          | Labetalol                                                           |
|--------------------|---------------------------------------------------------------------|---------------------------------------------------------------------|---------------------------------------------------------------------|
| Structure          |                                                                     |                                                                     |                                                                     |
| Actual Endpoint    | Single-Carcinogen                                                   | Single-Carcinogen                                                   | Single-Carcinogen                                                   |
| Predicted Endpoint | Single-Carcinogen                                                   | Single-Carcinogen                                                   | Single-Carcinogen                                                   |
| Similarity         | 0.319                                                               | 0.271                                                               | 0.261                                                               |
| Reference          | US FDA (Centre for Drug Eval.& Res./Off. Testing & Res.) Sept. 1997 | US FDA (Centre for Drug Eval.& Res./Off. Testing & Res.) Sept. 1997 | US FDA (Centre for Drug Eval.& Res./Off. Testing & Res.) Sept. 1997 |

## Model Applicability

Missing features are fingerprint features in the query molecule not found in the training set.

1. Missing Feature: ECFP\_4 1792159373 [\*]C(=C(C)[c](:[\*]):[\*])[\*]
2. Missing Feature: ECFP\_4 -785659985 [\*][c]1:[\*]:[\*]:o:c:1
3. Missing Feature: ECFP\_4 1731843802 [\*]CC(=O)N[\*]

## Feature Contribution

| Top features for Multiple-Carcinogen |           |                  |       |                                     |
|--------------------------------------|-----------|------------------|-------|-------------------------------------|
| Fingerprint                          | Bit       | Structure/Smiles | Score | Multiple-Carcinogen in training set |
| ECFP_4                               | -97599322 |                  | 0.641 | 4 out of 4                          |

| ECFP_4                             | -176686665  | 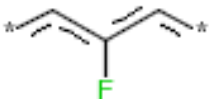   | 0.641  | 4 out of 4                          |
|------------------------------------|-------------|---------------------------------------------------------------------------------------|--------|-------------------------------------|
| ECFP_4                             | -296909061  |    | 0.586  | 3 out of 3                          |
| Top Features for Single-Carcinogen |             |                                                                                       |        |                                     |
| Fingerprint                        | Bit         | Structure/Smiles                                                                      | Score  | Multiple-Carcinogen in training set |
| ECFP_4                             | 497523368   |    | -0.968 | 0 out of 4                          |
| ECFP_4                             | 1205550831  |  | -0.545 | 1 out of 6                          |
| ECFP_4                             | -1897341097 |  | -0.356 | 8 out of 29                         |





$C_{28}H_{34}N_5O_2$

Molecular Weight: 472.60186

ALogP: 1.567

Rotatable Bonds: 6

Acceptors: 2

Donors: 3

## Model Prediction

Prediction: Single-Carcinogen

Probability: 0.279

Enrichment: 0.680

Bayesian Score: -4.530

Prediction: Positive if the Bayesian score is above the estimated best cutoff value.

Probability: The estimated probability that the sample is in the category.

Enrichment: An estimate of enrichment, that is, the increased likelihood (versus random) of this sample being in the category.

Bayesian Score: The standard Laplacian-modified Bayesian score.

## Structural Similar Compounds

| Name               | Methylphenidate                                                     | Glimepride                                                          | Pergolide                                                           |
|--------------------|---------------------------------------------------------------------|---------------------------------------------------------------------|---------------------------------------------------------------------|
| Structure          |                                                                     |                                                                     |                                                                     |
| Actual Endpoint    | Single-Carcinogen                                                   | Single-Carcinogen                                                   | Single-Carcinogen                                                   |
| Predicted Endpoint | Single-Carcinogen                                                   | Single-Carcinogen                                                   | Single-Carcinogen                                                   |
| Similarity         | 0.258                                                               | 0.257                                                               | 0.247                                                               |
| Reference          | US FDA (Centre for Drug Eval.& Res./Off. Testing & Res.) Sept. 1997 | US FDA (Centre for Drug Eval.& Res./Off. Testing & Res.) Sept. 1997 | US FDA (Centre for Drug Eval.& Res./Off. Testing & Res.) Sept. 1997 |

## Model Applicability

Missing features are fingerprint features in the query molecule not found in the training set.

1. Missing Feature: ECFP\_4 1976330679 [\*][NH+]([\*])[\*]
2. Missing Feature: ECFP\_4 979542842 [\*]C[c]1:n:[\*]:[\*]:[c]:1[\*]
3. Missing Feature: ECFP\_4 -1102925512 [\*]CN(C[\*])C(=[\*])[\*]
4. Missing Feature: ECFP\_4 1133499173 [\*]C[NH+](C[\*])C[\*]
5. Missing Feature: ECFP\_4 -1831055759 [\*]C=C[c](:[\*]):[\*]
6. Missing Feature: ECFP\_4 -244159614 [\*]CC[NH+]([\*])[\*]
7. Missing Feature: ECFP\_4 474483418 [\*][NH+]([\*])CC=[\*]
8. Missing Feature: ECFP\_4 -176483725 [\*]=C[c](:c:[\*]):c:[\*]

## Feature Contribution

### Top features for Multiple-Carcinogen

| Fingerprint | Bit | Structure/Smiles | Score | Multiple-Carcinogen in training set |
|-------------|-----|------------------|-------|-------------------------------------|
|             |     |                  |       |                                     |

|        |            |                                                                                     |       |             |
|--------|------------|-------------------------------------------------------------------------------------|-------|-------------|
| ECFP_4 | 246515844  | 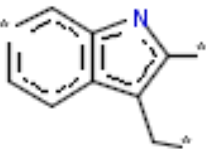 | 0.351 | 1 out of 1  |
| ECFP_4 | 1571214559 |  | 0.283 | 9 out of 16 |
| ECFP_4 | -757679000 |  | 0.242 | 6 out of 11 |

### Top Features for Single-Carcinogen

| Fingerprint | Bit         | Structure/Smiles                                                                      | Score  | Multiple-Carcinogen in training set |
|-------------|-------------|---------------------------------------------------------------------------------------|--------|-------------------------------------|
| ECFP_4      | 497523368   | 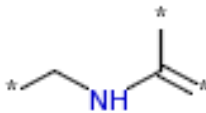 | -0.968 | 0 out of 4                          |
| ECFP_4      | -1925046727 |  | -0.605 | 2 out of 11                         |



|        |            |                                                                                                                                                                                                                                                                                                                                                                                                                                                                         |        |            |
|--------|------------|-------------------------------------------------------------------------------------------------------------------------------------------------------------------------------------------------------------------------------------------------------------------------------------------------------------------------------------------------------------------------------------------------------------------------------------------------------------------------|--------|------------|
| ECFP_4 | 1639858918 | 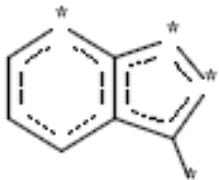 <chem>Cc1ccccc1</chem> <p>The chemical structure is 2-methylindole (skatole). It consists of an indole ring system with a methyl group at the 2-position. The atoms are mapped with numbers: the methyl carbon is 1, the methyl hydrogens are 2, 3, and 4, the indole nitrogen is 5, the indole ring carbons are 6 through 11, and the indole ring hydrogens are 12 through 17.</p> | -0.597 | 0 out of 2 |
|--------|------------|-------------------------------------------------------------------------------------------------------------------------------------------------------------------------------------------------------------------------------------------------------------------------------------------------------------------------------------------------------------------------------------------------------------------------------------------------------------------------|--------|------------|

## MOST ACTIVE.mol

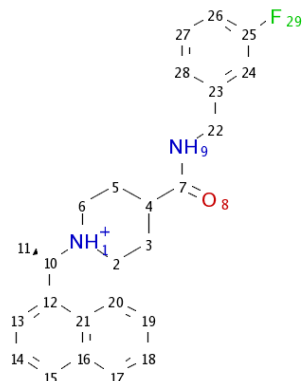

C<sub>25</sub>H<sub>28</sub>FN<sub>2</sub>O

Molecular Weight: 391.50102

ALogP: 3.098

Rotatable Bonds: 5

Acceptors: 1

Donors: 2

### Model Prediction

**Prediction: Multiple-Carcinogen**

Probability: 0.356

Enrichment: 0.869

Bayesian Score: -1.198

Prediction: Positive if the Bayesian score is above the estimated best cutoff value.

Probability: The estimated probability that the sample is in the category.

Enrichment: An estimate of enrichment, that is, the increased likelihood (versus random) of this sample being in the category.

Bayesian Score: The standard Laplacian-modified Bayesian score.

## TOPKAT\_Mouse\_Female\_FDA\_Single\_vs\_Multiple

### Structural Similar Compounds

| Name               | Phenobarbital                                                       | Sertraline                                                          | Diazepam                                                            |
|--------------------|---------------------------------------------------------------------|---------------------------------------------------------------------|---------------------------------------------------------------------|
| Structure          |                                                                     |                                                                     |                                                                     |
| Actual Endpoint    | Multiple-Carcinogen                                                 | Single-Carcinogen                                                   | Multiple-Carcinogen                                                 |
| Predicted Endpoint | Multiple-Carcinogen                                                 | Single-Carcinogen                                                   | Multiple-Carcinogen                                                 |
| Similarity         | 0.311                                                               | 0.306                                                               | 0.302                                                               |
| Reference          | US FDA (Centre for Drug Eval.& Res./Off. Testing & Res.) Sept. 1997 | US FDA (Centre for Drug Eval.& Res./Off. Testing & Res.) Sept. 1997 | US FDA (Centre for Drug Eval.& Res./Off. Testing & Res.) Sept. 1997 |

### Model Applicability

Missing features are fingerprint features in the query molecule not found in the training set.

- Missing Feature: ECFP\_4 1976330679 [\*][NH+]([\*])[\*]
- Missing Feature: ECFP\_4 2070272975 [\*]C[NH+](C[\*])C([\*])[\*]
- Missing Feature: ECFP\_4 -244159614 [\*]CC[NH+]([\*])[\*]
- Missing Feature: ECFP\_4 -857146788 [\*]CC(C[\*])C(=[\*])[\*]
- Missing Feature: ECFP\_4 -81134287 [\*]NC(=O)C([\*])[\*]
- Missing Feature: ECFP\_4 -1670638661 [\*][NH+]([\*])[C@H](C)[c](:[\*]):[\*]
- Missing Feature: ECFP\_4 1335340087 [\*]C([\*])[c](:c[\*]):[c](:[\*]):[\*]

### Feature Contribution

#### Top features for Multiple-Carcinogen

| Fingerprint | Bit | Structure/Smiles | Score | Multiple-Carcinogen in training set |
|-------------|-----|------------------|-------|-------------------------------------|
|             |     |                  |       |                                     |

|        |             |                                                                                     |       |            |
|--------|-------------|-------------------------------------------------------------------------------------|-------|------------|
| ECFP_4 | -176686665  | 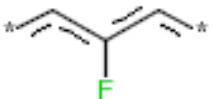 | 0.641 | 4 out of 4 |
| ECFP_4 | 220735655   |  | 0.497 | 4 out of 5 |
| ECFP_4 | -1560646374 |  | 0.351 | 1 out of 1 |

### Top Features for Single-Carcinogen

| Fingerprint | Bit        | Structure/Smiles                                                                      | Score  | Multiple-Carcinogen in training set |
|-------------|------------|---------------------------------------------------------------------------------------|--------|-------------------------------------|
| ECFP_4      | -178525456 | 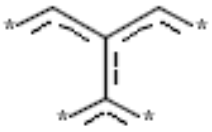 | -0.968 | 0 out of 4                          |
| ECFP_4      | 497523368  |  | -0.968 | 0 out of 4                          |

|        |           |                                                                                                                 |        |            |
|--------|-----------|-----------------------------------------------------------------------------------------------------------------|--------|------------|
| ECFP_4 | 717474525 | 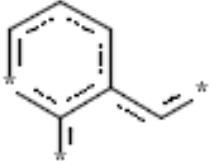 <chem>O=Cc1cccc(c1)I</chem> | -0.800 | 0 out of 3 |
|--------|-----------|-----------------------------------------------------------------------------------------------------------------|--------|------------|



$C_{24}H_{27}NO_7$

Molecular Weight: 441.47368

ALogP: 3.388

Rotatable Bonds: 9

Acceptors: 7

Donors: 1

## Model Prediction

Prediction: Non-Carcinogen

Probability: 0.193

Enrichment: 0.655

Bayesian Score: -5.286

Prediction: Positive if the Bayesian score is above the estimated best cutoff value.

Probability: The estimated probability that the sample is in the category.

Enrichment: An estimate of enrichment, that is, the increased likelihood (versus random) of this sample being in the category.

Bayesian Score: The standard Laplacian-modified Bayesian score.

## Structural Similar Compounds

| Name               | Nabumetone                                                          | Atenolol                                                            | Glyburide                                                           |
|--------------------|---------------------------------------------------------------------|---------------------------------------------------------------------|---------------------------------------------------------------------|
| Structure          |                                                                     |                                                                     |                                                                     |
| Actual Endpoint    | Non-Carcinogen                                                      | Non-Carcinogen                                                      | Non-Carcinogen                                                      |
| Predicted Endpoint | Non-Carcinogen                                                      | Non-Carcinogen                                                      | Non-Carcinogen                                                      |
| Similarity         | 0.395                                                               | 0.383                                                               | 0.375                                                               |
| Reference          | US FDA (Centre for Drug Eval.& Res./Off. Testing & Res.) Sept. 1997 | US FDA (Centre for Drug Eval.& Res./Off. Testing & Res.) Sept. 1997 | US FDA (Centre for Drug Eval.& Res./Off. Testing & Res.) Sept. 1997 |

## Model Applicability

Missing features are fingerprint features in the query molecule not found in the training set.

1. All descriptors are in range.

## Feature Contribution

### Top features for Carcinogen

| Fingerprint | Bit      | Structure/Smiles | Score | Carcinogen in training set |
|-------------|----------|------------------|-------|----------------------------|
| SCFP_6      | 55523958 |                  | 0.511 | 2 out of 3                 |

| SCFP_6                          | -392286499  | 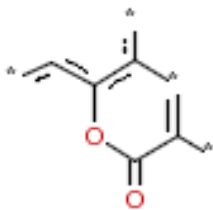   | 0.457  | 1 out of 1                 |
|---------------------------------|-------------|---------------------------------------------------------------------------------------|--------|----------------------------|
| SCFP_6                          | 1157879834  |    | 0.266  | 1 out of 2                 |
| Top Features for Non-Carcinogen |             |                                                                                       |        |                            |
| Fingerprint                     | Bit         | Structure/Smiles                                                                      | Score  | Carcinogen in training set |
| SCFP_6                          | -1211866396 |    | -1.233 | 1 out of 22                |
| SCFP_6                          | -1642341584 |   | -0.847 | 0 out of 5                 |
| SCFP_6                          | -1850586302 |  | -0.587 | 0 out of 3                 |



$C_{25}H_{29}N_3O_4$

Molecular Weight: 435.51546

ALogP: 2.831

Rotatable Bonds: 8

Acceptors: 4

Donors: 2

## Model Prediction

Prediction: Non-Carcinogen

Probability: 0.173

Enrichment: 0.586

Bayesian Score: -8.458

Prediction: Positive if the Bayesian score is above the estimated best cutoff value.

Probability: The estimated probability that the sample is in the category.

Enrichment: An estimate of enrichment, that is, the increased likelihood (versus random) of this sample being in the category.

Bayesian Score: The standard Laplacian-modified Bayesian score.

## Structural Similar Compounds

| Name               | Reserpine                                                           | Pergolide                                                           | Etodolac                                                            |
|--------------------|---------------------------------------------------------------------|---------------------------------------------------------------------|---------------------------------------------------------------------|
| Structure          |                                                                     |                                                                     |                                                                     |
| Actual Endpoint    | Carcinogen                                                          | Non-Carcinogen                                                      | Non-Carcinogen                                                      |
| Predicted Endpoint | Carcinogen                                                          | Non-Carcinogen                                                      | Non-Carcinogen                                                      |
| Similarity         | 0.352                                                               | 0.303                                                               | 0.297                                                               |
| Reference          | US FDA (Centre for Drug Eval.& Res./Off. Testing & Res.) Sept. 1997 | US FDA (Centre for Drug Eval.& Res./Off. Testing & Res.) Sept. 1997 | US FDA (Centre for Drug Eval.& Res./Off. Testing & Res.) Sept. 1997 |

## Model Applicability

Missing features are fingerprint features in the query molecule not found in the training set.

1. All descriptors are in range.

## Feature Contribution

| Top features for Carcinogen |            |                  |       |                            |
|-----------------------------|------------|------------------|-------|----------------------------|
| Fingerprint                 | Bit        | Structure/Smiles | Score | Carcinogen in training set |
| SCFP_6                      | 1651620003 |                  | 0.468 | 4 out of 8                 |

| SCFP_6                          | -1272768868 | 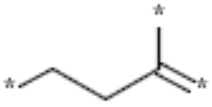   | 0.402  | 20 out of 49               |
|---------------------------------|-------------|---------------------------------------------------------------------------------------|--------|----------------------------|
| SCFP_6                          | -704249936  |    | 0.373  | 2 out of 4                 |
| Top Features for Non-Carcinogen |             |                                                                                       |        |                            |
| Fingerprint                     | Bit         | Structure/Smiles                                                                      | Score  | Carcinogen in training set |
| SCFP_6                          | -1211866396 |    | -1.233 | 1 out of 22                |
| SCFP_6                          | -1343150366 |  | -1.017 | 1 out of 17                |
| SCFP_6                          | -1642341584 |  | -0.847 | 0 out of 5                 |





$C_{29}H_{24}FNO_5$

Molecular Weight: 485.50296

ALogP: 5.695

Rotatable Bonds: 7

Acceptors: 4

Donors: 2

## Model Prediction

Prediction: Non-Carcinogen

Probability: 0.208

Enrichment: 0.706

Bayesian Score: -3.871

Prediction: Positive if the Bayesian score is above the estimated best cutoff value.

Probability: The estimated probability that the sample is in the category.

Enrichment: An estimate of enrichment, that is, the increased likelihood (versus random) of this sample being in the category.

Bayesian Score: The standard Laplacian-modified Bayesian score.

## Structural Similar Compounds

| Name               | Glyburide                                                           | Fluvastatin                                                         | Glimepiride                                                         |
|--------------------|---------------------------------------------------------------------|---------------------------------------------------------------------|---------------------------------------------------------------------|
| Structure          |                                                                     |                                                                     |                                                                     |
| Actual Endpoint    | Non-Carcinogen                                                      | Non-Carcinogen                                                      | Carcinogen                                                          |
| Predicted Endpoint | Non-Carcinogen                                                      | Non-Carcinogen                                                      | Carcinogen                                                          |
| Similarity         | 0.357                                                               | 0.324                                                               | 0.319                                                               |
| Reference          | US FDA (Centre for Drug Eval.& Res./Off. Testing & Res.) Sept. 1997 | US FDA (Centre for Drug Eval.& Res./Off. Testing & Res.) Sept. 1997 | US FDA (Centre for Drug Eval.& Res./Off. Testing & Res.) Sept. 1997 |

## Model Applicability

Missing features are fingerprint features in the query molecule not found in the training set.

1. All descriptors are in range.

## Feature Contribution

### Top features for Carcinogen

| Fingerprint | Bit        | Structure/Smiles | Score | Carcinogen in training set |
|-------------|------------|------------------|-------|----------------------------|
| SCFP_6      | 1958008606 |                  | 0.661 | 3 out of 4                 |

| SCFP_6                          | 794417578   | 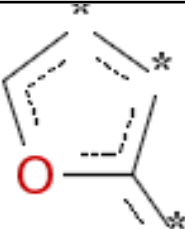    | 0.569  | 5 out of 9                 |
|---------------------------------|-------------|---------------------------------------------------------------------------------------|--------|----------------------------|
| SCFP_6                          | 55523958    |    | 0.511  | 2 out of 3                 |
| Top Features for Non-Carcinogen |             |                                                                                       |        |                            |
| Fingerprint                     | Bit         | Structure/Smiles                                                                      | Score  | Carcinogen in training set |
| SCFP_6                          | -1211866396 |    | -1.233 | 1 out of 22                |
| SCFP_6                          | -1642341584 |   | -0.847 | 0 out of 5                 |
| SCFP_6                          | 1689050571  |  | -0.725 | 0 out of 4                 |

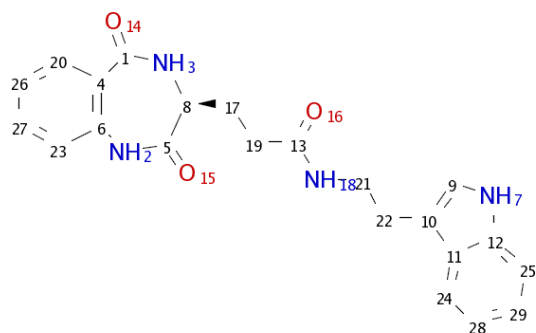

$C_{22}H_{22}N_4O_3$

Molecular Weight: 390.43508

ALogP: 1.807

Rotatable Bonds: 6

Acceptors: 3

Donors: 4

## Model Prediction

Prediction: Non-Carcinogen

Probability: 0.208

Enrichment: 0.707

Bayesian Score: -3.852

Prediction: Positive if the Bayesian score is above the estimated best cutoff value.

Probability: The estimated probability that the sample is in the category.

Enrichment: An estimate of enrichment, that is, the increased likelihood (versus random) of this sample being in the category.

Bayesian Score: The standard Laplacian-modified Bayesian score.

## Structural Similar Compounds

| Name               | Tryptophan                                                          | Prilocaine                                                          | Sumatriptan                                                         |
|--------------------|---------------------------------------------------------------------|---------------------------------------------------------------------|---------------------------------------------------------------------|
| Structure          |                                                                     |                                                                     |                                                                     |
| Actual Endpoint    | Non-Carcinogen                                                      | Carcinogen                                                          | Non-Carcinogen                                                      |
| Predicted Endpoint | Non-Carcinogen                                                      | Carcinogen                                                          | Non-Carcinogen                                                      |
| Similarity         | 0.440                                                               | 0.400                                                               | 0.375                                                               |
| Reference          | US FDA (Centre for Drug Eval.& Res./Off. Testing & Res.) Sept. 1997 | US FDA (Centre for Drug Eval.& Res./Off. Testing & Res.) Sept. 1997 | US FDA (Centre for Drug Eval.& Res./Off. Testing & Res.) Sept. 1997 |

## Model Applicability

Missing features are fingerprint features in the query molecule not found in the training set.

1. All descriptors are in range.

## Feature Contribution

### Top features for Carcinogen

| Fingerprint | Bit        | Structure/Smiles | Score | Carcinogen in training set |
|-------------|------------|------------------|-------|----------------------------|
| SCFP_6      | 2097618059 | <br>Chiral       | 0.711 | 7 out of 11                |

| SCFP_6                          | 1631845520  | 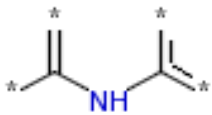   | 0.501  | 9 out of 19                |
|---------------------------------|-------------|---------------------------------------------------------------------------------------|--------|----------------------------|
| SCFP_6                          | 1651620003  |    | 0.468  | 4 out of 8                 |
| Top Features for Non-Carcinogen |             |                                                                                       |        |                            |
| Fingerprint                     | Bit         | Structure/Smiles                                                                      | Score  | Carcinogen in training set |
| SCFP_6                          | -673674794  |    | -0.847 | 0 out of 5                 |
| SCFP_6                          | 1188101983  |   | -0.847 | 0 out of 5                 |
| SCFP_6                          | -1946889102 |  | -0.741 | 1 out of 12                |

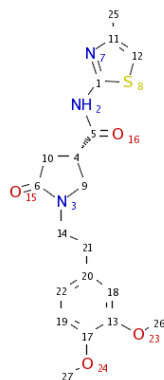

C<sub>19</sub>H<sub>23</sub>N<sub>3</sub>O<sub>4</sub>S  
Molecular Weight: 389.46862  
ALogP: 1.461  
Rotatable Bonds: 7  
Acceptors: 5  
Donors: 1

Model Prediction

Prediction: Non-Carcinogen

Probability: 0.214  
Enrichment: 0.726  
Bayesian Score: -3.407

Prediction: Positive if the Bayesian score is above the estimated best cutoff value.  
Probability: The estimated probability that the sample is in the category.  
Enrichment: An estimate of enrichment, that is, the increased likelihood (versus random) of this sample being in the category.  
Bayesian Score: The standard Laplacian-modified Bayesian score.

| Structural Similar Compounds |                                                                     |                                                                     |                                                                     |
|------------------------------|---------------------------------------------------------------------|---------------------------------------------------------------------|---------------------------------------------------------------------|
| Name                         | Sulfamethazine                                                      | Furothiazole                                                        | Glipizide                                                           |
| Structure                    |                                                                     |                                                                     |                                                                     |
| Actual Endpoint              | Carcinogen                                                          | Carcinogen                                                          | Non-Carcinogen                                                      |
| Predicted Endpoint           | Carcinogen                                                          | Carcinogen                                                          | Non-Carcinogen                                                      |
| Similarity                   | 0.314                                                               | 0.302                                                               | 0.295                                                               |
| Reference                    | US FDA (Centre for Drug Eval.& Res./Off. Testing & Res.) Sept. 1997 | US FDA (Centre for Drug Eval.& Res./Off. Testing & Res.) Sept. 1997 | US FDA (Centre for Drug Eval.& Res./Off. Testing & Res.) Sept. 1997 |

Model Applicability

Missing features are fingerprint features in the query molecule not found in the training set.

1. All descriptors are in range.

Feature Contribution

| Top features for Carcinogen |            |                  |       |                            |
|-----------------------------|------------|------------------|-------|----------------------------|
| Fingerprint                 | Bit        | Structure/Smiles | Score | Carcinogen in training set |
| SCFP_6                      | -100019659 |                  | 0.672 | 2 out of 2                 |

| SCFP_6                          | -1043310069 | 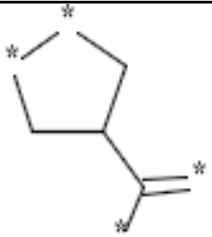    | 0.504  | 13 out of 28               |
|---------------------------------|-------------|---------------------------------------------------------------------------------------|--------|----------------------------|
| SCFP_6                          | 1631845520  |    | 0.501  | 9 out of 19                |
| Top Features for Non-Carcinogen |             |                                                                                       |        |                            |
| Fingerprint                     | Bit         | Structure/Smiles                                                                      | Score  | Carcinogen in training set |
| SCFP_6                          | -1211866396 |    | -1.233 | 1 out of 22                |
| SCFP_6                          | -1343150366 |  | -1.017 | 1 out of 17                |
| SCFP_6                          | -1642341584 |  | -0.847 | 0 out of 5                 |

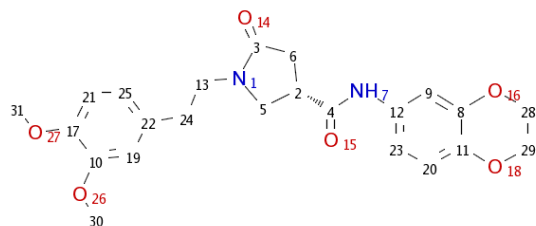

$C_{23}H_{26}N_2O_6$

Molecular Weight: 426.46234

ALogP: 1.967

Rotatable Bonds: 7

Acceptors: 6

Donors: 1

## Model Prediction

Prediction: Non-Carcinogen

Probability: 0.202

Enrichment: 0.685

Bayesian Score: -4.416

Prediction: Positive if the Bayesian score is above the estimated best cutoff value.

Probability: The estimated probability that the sample is in the category.

Enrichment: An estimate of enrichment, that is, the increased likelihood (versus random) of this sample being in the category.

Bayesian Score: The standard Laplacian-modified Bayesian score.

## Structural Similar Compounds

| Name               | Phenacetin                                                          | Nitroacetophenetide                                                 | Carteolol                                                           |
|--------------------|---------------------------------------------------------------------|---------------------------------------------------------------------|---------------------------------------------------------------------|
| Structure          |                                                                     |                                                                     |                                                                     |
| Actual Endpoint    | Carcinogen                                                          | Carcinogen                                                          | Non-Carcinogen                                                      |
| Predicted Endpoint | Carcinogen                                                          | Carcinogen                                                          | Non-Carcinogen                                                      |
| Similarity         | 0.425                                                               | 0.409                                                               | 0.358                                                               |
| Reference          | US FDA (Centre for Drug Eval.& Res./Off. Testing & Res.) Sept. 1997 | US FDA (Centre for Drug Eval.& Res./Off. Testing & Res.) Sept. 1997 | US FDA (Centre for Drug Eval.& Res./Off. Testing & Res.) Sept. 1997 |

## Model Applicability

Missing features are fingerprint features in the query molecule not found in the training set.

1. All descriptors are in range.

## Feature Contribution

### Top features for Carcinogen

| Fingerprint | Bit        | Structure/Smiles | Score | Carcinogen in training set |
|-------------|------------|------------------|-------|----------------------------|
| SCFP_6      | 2097618059 | <br>Chiral       | 0.711 | 7 out of 11                |

| SCFP_6                          | -531283893  | 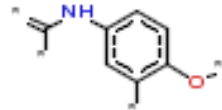   | 0.661  | 3 out of 4                 |
|---------------------------------|-------------|---------------------------------------------------------------------------------------|--------|----------------------------|
| SCFP_6                          | -347048986  |    | 0.655  | 4 out of 6                 |
| Top Features for Non-Carcinogen |             |                                                                                       |        |                            |
| Fingerprint                     | Bit         | Structure/Smiles                                                                      | Score  | Carcinogen in training set |
| SCFP_6                          | -1211866396 |    | -1.233 | 1 out of 22                |
| SCFP_6                          | -1343150366 |  | -1.017 | 1 out of 17                |
| SCFP_6                          | -1642341584 |  | -0.847 | 0 out of 5                 |



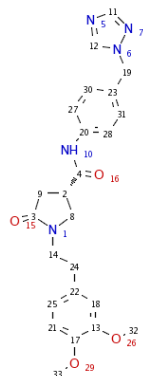

$C_{24}H_{27}N_5O_4$

Molecular Weight: 449.50228

ALogP: 1.731

Rotatable Bonds: 9

Acceptors: 6

Donors: 1

## Model Prediction

Prediction: Non-Carcinogen

Probability: 0.182

Enrichment: 0.618

Bayesian Score: -6.696

Prediction: Positive if the Bayesian score is above the estimated best cutoff value.

Probability: The estimated probability that the sample is in the category.

Enrichment: An estimate of enrichment, that is, the increased likelihood (versus random) of this sample being in the category.

Bayesian Score: The standard Laplacian-modified Bayesian score.

## Structural Similar Compounds

| Name               | Phenacetin                                                          | Nitroacetophenetide                                                 | Itraconazole                                                        |
|--------------------|---------------------------------------------------------------------|---------------------------------------------------------------------|---------------------------------------------------------------------|
| Structure          |                                                                     |                                                                     |                                                                     |
| Actual Endpoint    | Carcinogen                                                          | Carcinogen                                                          | Non-Carcinogen                                                      |
| Predicted Endpoint | Carcinogen                                                          | Carcinogen                                                          | Non-Carcinogen                                                      |
| Similarity         | 0.314                                                               | 0.309                                                               | 0.291                                                               |
| Reference          | US FDA (Centre for Drug Eval.& Res./Off. Testing & Res.) Sept. 1997 | US FDA (Centre for Drug Eval.& Res./Off. Testing & Res.) Sept. 1997 | US FDA (Centre for Drug Eval.& Res./Off. Testing & Res.) Sept. 1997 |

## Model Applicability

Missing features are fingerprint features in the query molecule not found in the training set.

1. All descriptors are in range.

## Feature Contribution

### Top features for Carcinogen

| Fingerprint | Bit        | Structure/Smiles | Score | Carcinogen in training set |
|-------------|------------|------------------|-------|----------------------------|
| SCFP_6      | 2097618059 | <br>Chiral       | 0.711 | 7 out of 11                |

| SCFP_6                          | 814408713   | 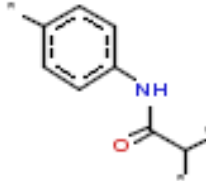   | 0.672  | 2 out of 2                 |
|---------------------------------|-------------|---------------------------------------------------------------------------------------|--------|----------------------------|
| SCFP_6                          | -347048986  |    | 0.655  | 4 out of 6                 |
| Top Features for Non-Carcinogen |             |                                                                                       |        |                            |
| Fingerprint                     | Bit         | Structure/Smiles                                                                      | Score  | Carcinogen in training set |
| SCFP_6                          | -1211866396 |    | -1.233 | 1 out of 22                |
| SCFP_6                          | -1343150366 |  | -1.017 | 1 out of 17                |
| SCFP_6                          | -1642341584 |  | -0.847 | 0 out of 5                 |

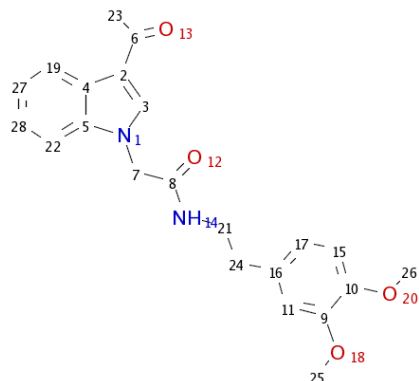

$C_{22}H_{24}N_2O_4$

Molecular Weight: 380.43696

ALogP: 3.001

Rotatable Bonds: 8

Acceptors: 4

Donors: 1

## Model Prediction

Prediction: Non-Carcinogen

Probability: 0.175

Enrichment: 0.596

Bayesian Score: -7.808

Prediction: Positive if the Bayesian score is above the estimated best cutoff value.

Probability: The estimated probability that the sample is in the category.

Enrichment: An estimate of enrichment, that is, the increased likelihood (versus random) of this sample being in the category.

Bayesian Score: The standard Laplacian-modified Bayesian score.

## Structural Similar Compounds

| Name               | Propafenone                                                         | Glyburide                                                           | Ondansetron                                                         |
|--------------------|---------------------------------------------------------------------|---------------------------------------------------------------------|---------------------------------------------------------------------|
| Structure          |                                                                     |                                                                     |                                                                     |
| Actual Endpoint    | Non-Carcinogen                                                      | Non-Carcinogen                                                      | Non-Carcinogen                                                      |
| Predicted Endpoint | Non-Carcinogen                                                      | Non-Carcinogen                                                      | Non-Carcinogen                                                      |
| Similarity         | 0.345                                                               | 0.344                                                               | 0.333                                                               |
| Reference          | US FDA (Centre for Drug Eval.& Res./Off. Testing & Res.) Sept. 1997 | US FDA (Centre for Drug Eval.& Res./Off. Testing & Res.) Sept. 1997 | US FDA (Centre for Drug Eval.& Res./Off. Testing & Res.) Sept. 1997 |

## Model Applicability

Missing features are fingerprint features in the query molecule not found in the training set.

- Missing Feature: SCFP\_6 1964617636 [\*]C(=[\*])Cn(:[\*]):[\*]

## Feature Contribution

### Top features for Carcinogen

| Fingerprint | Bit        | Structure/Smiles | Score | Carcinogen in training set |
|-------------|------------|------------------|-------|----------------------------|
| SCFP_6      | 1651620003 |                  | 0.468 | 4 out of 8                 |

| SCFP_6                          | -1379673609 | 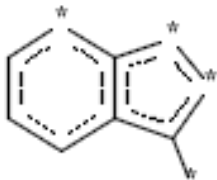   | 0.337  | 6 out of 15                |
|---------------------------------|-------------|---------------------------------------------------------------------------------------|--------|----------------------------|
| SCFP_6                          | 125999298   |    | 0.234  | 7 out of 20                |
| Top Features for Non-Carcinogen |             |                                                                                       |        |                            |
| Fingerprint                     | Bit         | Structure/Smiles                                                                      | Score  | Carcinogen in training set |
| SCFP_6                          | -1211866396 |    | -1.233 | 1 out of 22                |
| SCFP_6                          | -1642341584 |   | -0.847 | 0 out of 5                 |
| SCFP_6                          | -1850586302 |  | -0.587 | 0 out of 3                 |



$C_{23}H_{26}N_4O_2$

Molecular Weight: 390.47814

ALogP: 2.702

Rotatable Bonds: 5

Acceptors: 2

Donors: 2

## Model Prediction

Prediction: Carcinogen

Probability: 0.243

Enrichment: 0.825

Bayesian Score: -1.515

Prediction: Positive if the Bayesian score is above the estimated best cutoff value.

Probability: The estimated probability that the sample is in the category.

Enrichment: An estimate of enrichment, that is, the increased likelihood (versus random) of this sample being in the category.

Bayesian Score: The standard Laplacian-modified Bayesian score.

## Structural Similar Compounds

| Name               | Etodolac                                                            | Tryptophan                                                          | Glimepride                                                          |
|--------------------|---------------------------------------------------------------------|---------------------------------------------------------------------|---------------------------------------------------------------------|
| Structure          |                                                                     |                                                                     |                                                                     |
| Actual Endpoint    | Non-Carcinogen                                                      | Non-Carcinogen                                                      | Carcinogen                                                          |
| Predicted Endpoint | Non-Carcinogen                                                      | Non-Carcinogen                                                      | Carcinogen                                                          |
| Similarity         | 0.368                                                               | 0.340                                                               | 0.297                                                               |
| Reference          | US FDA (Centre for Drug Eval.& Res./Off. Testing & Res.) Sept. 1997 | US FDA (Centre for Drug Eval.& Res./Off. Testing & Res.) Sept. 1997 | US FDA (Centre for Drug Eval.& Res./Off. Testing & Res.) Sept. 1997 |

## Model Applicability

Missing features are fingerprint features in the query molecule not found in the training set.

1. All descriptors are in range.

## Feature Contribution

### Top features for Carcinogen

| Fingerprint | Bit         | Structure/Smiles | Score | Carcinogen in training set |
|-------------|-------------|------------------|-------|----------------------------|
| SCFP_6      | -1629661413 |                  | 0.661 | 3 out of 4                 |

| SCFP_6                          | 1651620003  | 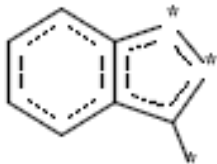   | 0.468  | 4 out of 8                 |
|---------------------------------|-------------|---------------------------------------------------------------------------------------|--------|----------------------------|
| SCFP_6                          | 1962031760  |    | 0.457  | 1 out of 1                 |
| Top Features for Non-Carcinogen |             |                                                                                       |        |                            |
| Fingerprint                     | Bit         | Structure/Smiles                                                                      | Score  | Carcinogen in training set |
| SCFP_6                          | -1343150366 |    | -1.017 | 1 out of 17                |
| SCFP_6                          | 403834996   |  | -0.725 | 0 out of 4                 |
| SCFP_6                          | 2095592978  |  | -0.587 | 0 out of 3                 |



$C_{28}H_{34}N_5O_2$

Molecular Weight: 472.60186

ALogP: 1.567

Rotatable Bonds: 6

Acceptors: 2

Donors: 3

## Model Prediction

**Prediction: Carcinogen**

Probability: 0.257

Enrichment: 0.874

Bayesian Score: -0.742

Prediction: Positive if the Bayesian score is above the estimated best cutoff value.

Probability: The estimated probability that the sample is in the category.

Enrichment: An estimate of enrichment, that is, the increased likelihood (versus random) of this sample being in the category.

Bayesian Score: The standard Laplacian-modified Bayesian score.

## Structural Similar Compounds

| Name               | Etodolac                                                            | Tryptophan                                                          | Bromocriptine                                                       |
|--------------------|---------------------------------------------------------------------|---------------------------------------------------------------------|---------------------------------------------------------------------|
| Structure          |                                                                     |                                                                     |                                                                     |
| Actual Endpoint    | Non-Carcinogen                                                      | Non-Carcinogen                                                      | Non-Carcinogen                                                      |
| Predicted Endpoint | Non-Carcinogen                                                      | Non-Carcinogen                                                      | Non-Carcinogen                                                      |
| Similarity         | 0.333                                                               | 0.286                                                               | 0.272                                                               |
| Reference          | US FDA (Centre for Drug Eval.& Res./Off. Testing & Res.) Sept. 1997 | US FDA (Centre for Drug Eval.& Res./Off. Testing & Res.) Sept. 1997 | US FDA (Centre for Drug Eval.& Res./Off. Testing & Res.) Sept. 1997 |

## Model Applicability

Missing features are fingerprint features in the query molecule not found in the training set.

1. Missing Feature: SCFP\_6 1930718785 [\*]C[NH+](C[\*])C[\*]
2. Missing Feature: SCFP\_6 -1396915742 [\*]CC[NH+](C[\*])C[\*]
3. Missing Feature: SCFP\_6 -1396885951 [\*][NH+](C[\*])CC=\*

## Feature Contribution

| Top features for Carcinogen |             |                  |       |                            |
|-----------------------------|-------------|------------------|-------|----------------------------|
| Fingerprint                 | Bit         | Structure/Smiles | Score | Carcinogen in training set |
| SCFP_6                      | -1629661413 |                  | 0.661 | 3 out of 4                 |

| SCFP_6                          | 1651620003  | 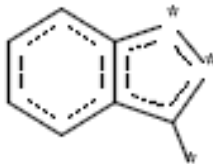   | 0.468  | 4 out of 8                 |
|---------------------------------|-------------|---------------------------------------------------------------------------------------|--------|----------------------------|
| SCFP_6                          | 1962031760  |    | 0.457  | 1 out of 1                 |
| Top Features for Non-Carcinogen |             |                                                                                       |        |                            |
| Fingerprint                     | Bit         | Structure/Smiles                                                                      | Score  | Carcinogen in training set |
| SCFP_6                          | -1343150366 |    | -1.017 | 1 out of 17                |
| SCFP_6                          | 403834996   |  | -0.725 | 0 out of 4                 |
| SCFP_6                          | -2103400817 |  | -0.587 | 0 out of 3                 |




$$\text{C}_{25}\text{H}_{28}\text{ClN}_5\text{O}_2$$

Molecular Weight: 465.97512

ALogP: 3.413

Rotatable Bonds: 4

Acceptors: 3

Donors: 2

## Model Prediction

**Prediction: Non-Carcinogen**

Probability: 0.181

Enrichment: 0.616

Bayesian Score: -6.767

Prediction: Positive if the Bayesian score is above the estimated best cutoff value.

**Probability:** The estimated probability that the sample is in the category.

**Enrichment:** An estimate of enrichment, that is, the increased likelihood (versus random) of this sample being in the category.

Bayesian Score: The standard Laplacian-modified Bayesian score.

## Structural Similar Compounds

| Name               | Temazepam                                                                           | Diazepam                                                                            | Ketoconazole                                                                        |
|--------------------|-------------------------------------------------------------------------------------|-------------------------------------------------------------------------------------|-------------------------------------------------------------------------------------|
| Structure          | 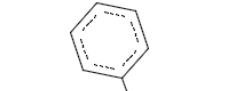 |  |  |
| Actual Endpoint    | Non-Carcinogen                                                                      | Carcinogen                                                                          | Non-Carcinogen                                                                      |
| Predicted Endpoint | Carcinogen                                                                          | Carcinogen                                                                          | Non-Carcinogen                                                                      |
| Similarity         | 0.339                                                                               | 0.328                                                                               | 0.312                                                                               |
| Reference          | US FDA (Centre for Drug Eval.& Res./Off. Testing & Res.) Sept. 1997                 | US FDA (Centre for Drug Eval.& Res./Off. Testing & Res.) Sept. 1997                 | US FDA (Centre for Drug Eval.& Res./Off. Testing & Res.) Sept. 1997                 |

## Model Applicability

Missing features are fingerprint features in the query molecule not found in the training set.

1. All descriptors are in range.

## Feature Contribution

### Top features for Carcinogen

| Fingerprint | Bit         | Structure/Smiles                                                                      | Score | Carcinogen in training set |
|-------------|-------------|---------------------------------------------------------------------------------------|-------|----------------------------|
| SCFP_6      | -1629661413 |  | 0.661 | 3 out of 4                 |

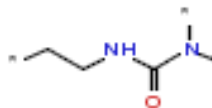

| SCFP_6                          | 1651620003  |    | 0.468  | 4 out of 8                 |
|---------------------------------|-------------|---------------------------------------------------------------------------------------|--------|----------------------------|
| SCFP_6                          | 1962031760  |    | 0.457  | 1 out of 1                 |
| Top Features for Non-Carcinogen |             |                                                                                       |        |                            |
| Fingerprint                     | Bit         | Structure/Smiles                                                                      | Score  | Carcinogen in training set |
| SCFP_6                          | -1343150366 |    | -1.017 | 1 out of 17                |
| SCFP_6                          | 403834996   |  | -0.725 | 0 out of 4                 |
| SCFP_6                          | -2103400817 |  | -0.587 | 0 out of 3                 |

## MOST ACTIVE.mol

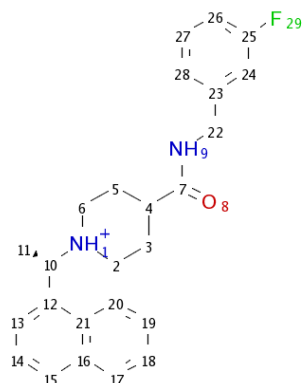

C<sub>25</sub>H<sub>28</sub>FN<sub>2</sub>O

Molecular Weight: 391.50102

ALogP: 3.098

Rotatable Bonds: 5

Acceptors: 1

Donors: 2

## Model Prediction

**Prediction: Carcinogen**

Probability: 0.326

Enrichment: 1.108

Bayesian Score: 2.069

Prediction: Positive if the Bayesian score is above the estimated best cutoff value.

Probability: The estimated probability that the sample is in the category.

Enrichment: An estimate of enrichment, that is, the increased likelihood (versus random) of this sample being in the category.

Bayesian Score: The standard Laplacian-modified Bayesian score.

## TOPKAT\_Mouse\_Male\_FDA\_None\_vs\_Carcinogen

### Structural Similar Compounds

| Name               | Bupropion                                                           | Chlorpropamide                                                      | Phenobarbital                                                       |
|--------------------|---------------------------------------------------------------------|---------------------------------------------------------------------|---------------------------------------------------------------------|
| Structure          |                                                                     |                                                                     |                                                                     |
| Actual Endpoint    | Non-Carcinogen                                                      | Non-Carcinogen                                                      | Carcinogen                                                          |
| Predicted Endpoint | Non-Carcinogen                                                      | Non-Carcinogen                                                      | Carcinogen                                                          |
| Similarity         | 0.362                                                               | 0.327                                                               | 0.311                                                               |
| Reference          | US FDA (Centre for Drug Eval.& Res./Off. Testing & Res.) Sept. 1997 | US FDA (Centre for Drug Eval.& Res./Off. Testing & Res.) Sept. 1997 | US FDA (Centre for Drug Eval.& Res./Off. Testing & Res.) Sept. 1997 |

### Model Applicability

Missing features are fingerprint features in the query molecule not found in the training set.

1. Missing Feature: SCFP\_6 1930718785 [\*]C[NH+](C[\*])C[\*]
2. Missing Feature: SCFP\_6 -1396915742 [\*]CC[NH+](C[\*])[\*]
3. Missing Feature: SCFP\_6 -1688664082 [\*][NH+](C[\*])[C@H](C)[c]([\*]):[\*]

### Feature Contribution

| Top features for Carcinogen |            |                  |       |                            |
|-----------------------------|------------|------------------|-------|----------------------------|
| Fingerprint                 | Bit        | Structure/Smiles | Score | Carcinogen in training set |
| SCFP_6                      | 2098257782 |                  | 0.511 | 2 out of 3                 |

| SCFP_6                          | -1043310069 | 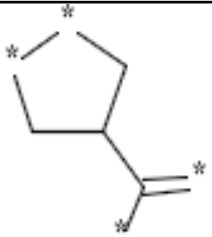    | 0.504  | 13 out of 28               |
|---------------------------------|-------------|---------------------------------------------------------------------------------------|--------|----------------------------|
| SCFP_6                          | 1651620003  |    | 0.468  | 4 out of 8                 |
| Top Features for Non-Carcinogen |             |                                                                                       |        |                            |
| Fingerprint                     | Bit         | Structure/Smiles                                                                      | Score  | Carcinogen in training set |
| SCFP_6                          | -1794884847 |    | -0.562 | 2 out of 16                |
| SCFP_6                          | -730654023  |  | -0.562 | 2 out of 16                |
| SCFP_6                          | -1381307546 |  | -0.455 | 2 out of 14                |


 $C_{23}H_{26}N_4O_2$ 

Molecular Weight: 390.47814

ALogP: 2.702

Rotatable Bonds: 5

Acceptors: 2

Donors: 2

## Model Prediction

Prediction: Single-Carcinogen

Probability: 0.220

Enrichment: 0.729

Bayesian Score: -2.238

Prediction: Positive if the Bayesian score is above the estimated best cutoff value.

Probability: The estimated probability that the sample is in the category.

Enrichment: An estimate of enrichment, that is, the increased likelihood (versus random) of this sample being in the category.

Bayesian Score: The standard Laplacian-modified Bayesian score.

## Structural Similar Compounds

| Name               | Glimepiride                                                         | Methylphenidate                                                     | Reserpine                                                           |
|--------------------|---------------------------------------------------------------------|---------------------------------------------------------------------|---------------------------------------------------------------------|
| Structure          |                                                                     |                                                                     |                                                                     |
| Actual Endpoint    | Single-Carcinogen                                                   | Single-Carcinogen                                                   | Multiple-Carcinogen                                                 |
| Predicted Endpoint | Single-Carcinogen                                                   | Single-Carcinogen                                                   | Multiple-Carcinogen                                                 |
| Similarity         | 0.297                                                               | 0.283                                                               | 0.264                                                               |
| Reference          | US FDA (Centre for Drug Eval.& Res./Off. Testing & Res.) Sept. 1997 | US FDA (Centre for Drug Eval.& Res./Off. Testing & Res.) Sept. 1997 | US FDA (Centre for Drug Eval.& Res./Off. Testing & Res.) Sept. 1997 |

## Model Applicability

Missing features are fingerprint features in the query molecule not found in the training set.

1. All descriptors are in range.

## Feature Contribution

### Top features for Multiple-Carcinogen

| Fingerprint | Bit         | Structure/Smiles | Score | Multiple-Carcinogen in training set |
|-------------|-------------|------------------|-------|-------------------------------------|
| FCFP_4      | -1826427264 |                  | 0.421 | 1 out of 1                          |

| FCFP_4                             | -1169541771 | 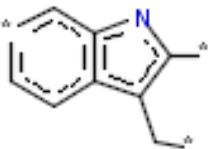   | 0.421  | 1 out of 1                          |
|------------------------------------|-------------|---------------------------------------------------------------------------------------|--------|-------------------------------------|
| FCFP_4                             | 1673997923  |    | 0.421  | 1 out of 1                          |
| Top Features for Single-Carcinogen |             |                                                                                       |        |                                     |
| Fingerprint                        | Bit         | Structure/Smiles                                                                      | Score  | Multiple-Carcinogen in training set |
| FCFP_4                             | 907036844   |    | -0.662 | 0 out of 3                          |
| FCFP_4                             | 991735244   |  | -0.486 | 5 out of 28                         |
| FCFP_4                             | 159404153   |  | -0.486 | 0 out of 2                          |



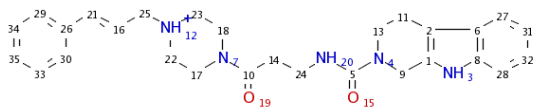

$C_{28}H_{34}N_5O_2$

Molecular Weight: 472.60186

ALogP: 1.567

Rotatable Bonds: 6

Acceptors: 2

Donors: 3

## Model Prediction

Prediction: Single-Carcinogen

Probability: 0.228

Enrichment: 0.757

Bayesian Score: -1.919

Prediction: Positive if the Bayesian score is above the estimated best cutoff value.

Probability: The estimated probability that the sample is in the category.

Enrichment: An estimate of enrichment, that is, the increased likelihood (versus random) of this sample being in the category.

Bayesian Score: The standard Laplacian-modified Bayesian score.

## Structural Similar Compounds

| Name               | Methylphenidate                                                     | Glimepiride                                                         | Reserpine                                                           |
|--------------------|---------------------------------------------------------------------|---------------------------------------------------------------------|---------------------------------------------------------------------|
| Structure          |                                                                     |                                                                     |                                                                     |
| Actual Endpoint    | Single-Carcinogen                                                   | Single-Carcinogen                                                   | Multiple-Carcinogen                                                 |
| Predicted Endpoint | Single-Carcinogen                                                   | Single-Carcinogen                                                   | Multiple-Carcinogen                                                 |
| Similarity         | 0.258                                                               | 0.257                                                               | 0.232                                                               |
| Reference          | US FDA (Centre for Drug Eval.& Res./Off. Testing & Res.) Sept. 1997 | US FDA (Centre for Drug Eval.& Res./Off. Testing & Res.) Sept. 1997 | US FDA (Centre for Drug Eval.& Res./Off. Testing & Res.) Sept. 1997 |

## Model Applicability

Missing features are fingerprint features in the query molecule not found in the training set.

1. Missing Feature: FCFP\_4 10 [\*][NH+]([\*])([\*])
2. Missing Feature: FCFP\_4 -1853714334 [\*]C[NH+](C[\*])C[\*]
3. Missing Feature: FCFP\_4 1155241219 [\*]CC[NH+]([\*])([\*])

## Feature Contribution

| Top features for Multiple-Carcinogen |             |                  |       |                                     |
|--------------------------------------|-------------|------------------|-------|-------------------------------------|
| Fingerprint                          | Bit         | Structure/Smiles | Score | Multiple-Carcinogen in training set |
| FCFP_4                               | -1169541771 |                  | 0.421 | 1 out of 1                          |



| FCFP_4                             | 1673997923  | 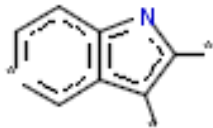   | 0.421  | 1 out of 1                          |
|------------------------------------|-------------|---------------------------------------------------------------------------------------|--------|-------------------------------------|
| FCFP_4                             | -1826427264 |    | 0.421  | 1 out of 1                          |
| Top Features for Single-Carcinogen |             |                                                                                       |        |                                     |
| Fingerprint                        | Bit         | Structure/Smiles                                                                      | Score  | Multiple-Carcinogen in training set |
| FCFP_4                             | 907036844   |    | -0.662 | 0 out of 3                          |
| FCFP_4                             | 991735244   |  | -0.486 | 5 out of 28                         |
| FCFP_4                             | 159404153   |  | -0.486 | 0 out of 2                          |



## MOST ACTIVE.mol



C<sub>25</sub>H<sub>28</sub>FN<sub>2</sub>O

Molecular Weight: 391.50102

ALogP: 3.098

Rotatable Bonds: 5

Acceptors: 1

Donors: 2

### Model Prediction

Prediction: Single-Carcinogen

Probability: 0.184

Enrichment: 0.610

Bayesian Score: -3.965

Prediction: Positive if the Bayesian score is above the estimated best cutoff value.

Probability: The estimated probability that the sample is in the category.

Enrichment: An estimate of enrichment, that is, the increased likelihood (versus random) of this sample being in the category.

Bayesian Score: The standard Laplacian-modified Bayesian score.

## TOPKAT\_Mouse\_Male\_FDA\_Single\_vs\_Multiple

### Structural Similar Compounds

| Name               | Phenobarbital                                                       | Sertraline                                                          | Diazepam                                                            |
|--------------------|---------------------------------------------------------------------|---------------------------------------------------------------------|---------------------------------------------------------------------|
| Structure          |                                                                     |                                                                     |                                                                     |
| Actual Endpoint    | Multiple-Carcinogen                                                 | Single-Carcinogen                                                   | Multiple-Carcinogen                                                 |
| Predicted Endpoint | Single-Carcinogen                                                   | Single-Carcinogen                                                   | Single-Carcinogen                                                   |
| Similarity         | 0.311                                                               | 0.306                                                               | 0.302                                                               |
| Reference          | US FDA (Centre for Drug Eval.& Res./Off. Testing & Res.) Sept. 1997 | US FDA (Centre for Drug Eval.& Res./Off. Testing & Res.) Sept. 1997 | US FDA (Centre for Drug Eval.& Res./Off. Testing & Res.) Sept. 1997 |

### Model Applicability

Missing features are fingerprint features in the query molecule not found in the training set.

1. Missing Feature: FCFP\_4 10 [\*][NH+]([\*])[\*]
2. Missing Feature: FCFP\_4 -1853714334 [\*]C[NH+](C[\*])C[\*]
3. Missing Feature: FCFP\_4 1155241219 [\*]CC[NH+]([\*])[\*]
4. Missing Feature: FCFP\_4 -680623486 [\*][NH+]([\*])[C@H](C)[c](:[\*]):[\*]

### Feature Contribution

| Top features for Multiple-Carcinogen |             |                  |       |                                     |
|--------------------------------------|-------------|------------------|-------|-------------------------------------|
| Fingerprint                          | Bit         | Structure/Smiles | Score | Multiple-Carcinogen in training set |
| FCFP_4                               | -1043339860 |                  | 0.424 | 12 out of 24                        |

|        |           |                                                                                     |       |            |
|--------|-----------|-------------------------------------------------------------------------------------|-------|------------|
| FCFP_4 | 427906732 | 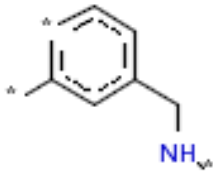 | 0.421 | 1 out of 1 |
| FCFP_4 | 907096426 |  | 0.421 | 1 out of 1 |

### Top Features for Single-Carcinogen

| Fingerprint | Bit       | Structure/Smiles                                                                      | Score  | Multiple-Carcinogen in training set |
|-------------|-----------|---------------------------------------------------------------------------------------|--------|-------------------------------------|
| FCFP_4      | 71476542  | 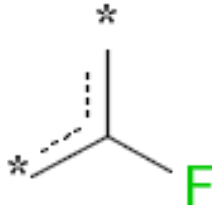   | -0.725 | 1 out of 10                         |
| FCFP_4      | 367998008 |  | -0.725 | 1 out of 10                         |
| FCFP_4      | 551850122 |  | -0.560 | 1 out of 8                          |





$C_{24}H_{27}NO_7$

Molecular Weight: 441.47368

ALogP: 3.388

Rotatable Bonds: 9

Acceptors: 7

Donors: 1

## Model Prediction

Prediction: Moderate\_Severe

Probability: 0.887

Enrichment: 1.288

Bayesian Score: 1.972

Prediction: Positive if the Bayesian score is above the estimated best cutoff value.

Probability: The estimated probability that the sample is in the category.

Enrichment: An estimate of enrichment, that is, the increased likelihood (versus random) of this sample being in the category.

Bayesian Score: The standard Laplacian-modified Bayesian score.

## Structural Similar Compounds

| Name               | NPE 9                                                                            | NPE 10                                                                           | NPE 13                                                                           |
|--------------------|----------------------------------------------------------------------------------|----------------------------------------------------------------------------------|----------------------------------------------------------------------------------|
| Structure          |                                                                                  |                                                                                  |                                                                                  |
| Actual Endpoint    | Moderate_Severe                                                                  | Moderate_Severe                                                                  | Moderate_Severe                                                                  |
| Predicted Endpoint | Moderate_Severe                                                                  | Moderate_Severe                                                                  | Moderate_Severe                                                                  |
| Similarity         | 0.370                                                                            | 0.370                                                                            | 0.370                                                                            |
| Reference          | In: Environ. and Human Safety of Major Surfactants; Talmage; S; 1994 Lewis Publi | In: Environ. and Human Safety of Major Surfactants; Talmage; S; 1994 Lewis Publi | In: Environ. and Human Safety of Major Surfactants; Talmage; S; 1994 Lewis Publi |

## Model Applicability

Missing features are fingerprint features in the query molecule not found in the training set.

1. All descriptors are in range.

## Feature Contribution

### Top features for Moderate\_Severe

| Fingerprint | Bit        | Structure/Smiles | Score | Moderate_Severe in training set |
|-------------|------------|------------------|-------|---------------------------------|
| FCFP_8      | 1985089045 |                  | 0.386 | 16 out of 16                    |

| FCFP_8                | -497728148  | 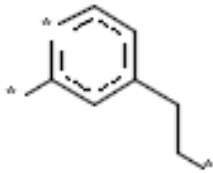   | 0.357  | 24 out of 25                       |
|-----------------------|-------------|---------------------------------------------------------------------------------------|--------|------------------------------------|
| FCFP_8                | -547731249  |    | 0.295  | 3 out of 3                         |
| Top Features for Mild |             |                                                                                       |        |                                    |
| Fingerprint           | Bit         | Structure/Smiles                                                                      | Score  | Moderate_Severe<br>in training set |
| FCFP_8                | -1977641857 |    | -0.779 | 4 out of 15                        |
| FCFP_8                | -1099193755 |  | -0.359 | 2 out of 5                         |
| FCFP_8                | 136627117   |  | -0.314 | 46 out of 96                       |

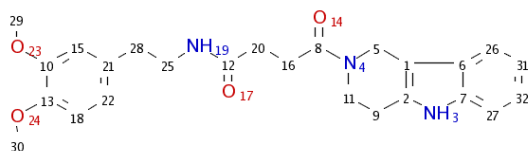

$C_{25}H_{29}N_3O_4$

Molecular Weight: 435.51546

ALogP: 2.831

Rotatable Bonds: 8

Acceptors: 4

Donors: 2

## Model Prediction

Prediction: Mild

Probability: 0.827

Enrichment: 1.201

Bayesian Score: -0.779

Prediction: Positive if the Bayesian score is above the estimated best cutoff value.

Probability: The estimated probability that the sample is in the category.

Enrichment: An estimate of enrichment, that is, the increased likelihood (versus random) of this sample being in the category.

Bayesian Score: The standard Laplacian-modified Bayesian score.

## Structural Similar Compounds

| Name               | ISOQUINOLINE; 1;2;3;4-TETRAHYDRO-2-OCTANOYL- | CARBAMIC ACID; METHYL-; 1-(5;6;7;8-TETRAHYDRO)NAPHTHYL ESTER | QUINOLINE; 1;2;3;4-TETRAHYDRO-1-(2-METHYL-1-OXOPENTYL)- |
|--------------------|----------------------------------------------|--------------------------------------------------------------|---------------------------------------------------------|
| Structure          |                                              |                                                              |                                                         |
| Actual Endpoint    | Mild                                         | Mild                                                         | Mild                                                    |
| Predicted Endpoint | Mild                                         | Mild                                                         | Mild                                                    |
| Similarity         | 0.358                                        | 0.291                                                        | 0.281                                                   |
| Reference          | NTIS** AD-A042-527                           | 28ZPAK-;163;72                                               | NTIS** AD-A056-106                                      |

## Model Applicability

Missing features are fingerprint features in the query molecule not found in the training set.

- Missing Feature: FCFP\_8 203707511 [\*]C[c]1:n:[\*]:[\*]:[c]:1[\*]

## Feature Contribution

### Top features for Moderate\_Severe

| Fingerprint | Bit        | Structure/Smiles | Score | Moderate_Severe in training set |
|-------------|------------|------------------|-------|---------------------------------|
| FCFP_8      | 1985089045 |                  | 0.386 | 16 out of 16                    |



| FCFP_8                | -497728148  | 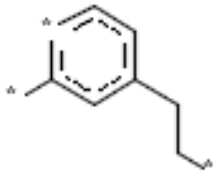   | 0.357  | 24 out of 25                       |
|-----------------------|-------------|---------------------------------------------------------------------------------------|--------|------------------------------------|
| FCFP_8                | -547731249  |    | 0.295  | 3 out of 3                         |
| Top Features for Mild |             |                                                                                       |        |                                    |
| Fingerprint           | Bit         | Structure/Smiles                                                                      | Score  | Moderate_Severe<br>in training set |
| FCFP_8                | -1977641857 |    | -0.779 | 4 out of 15                        |
| FCFP_8                | 907036844   |  | -0.598 | 1 out of 4                         |
| FCFP_8                | -1134225568 |  | -0.506 | 0 out of 1                         |



$C_{29}H_{24}FNO_5$

Molecular Weight: 485.50296

ALogP: 5.695

Rotatable Bonds: 7

Acceptors: 4

Donors: 2

## Model Prediction

Prediction: Moderate\_Severe

Probability: 0.895

Enrichment: 1.300

Bayesian Score: 2.204

Prediction: Positive if the Bayesian score is above the estimated best cutoff value.

Probability: The estimated probability that the sample is in the category.

Enrichment: An estimate of enrichment, that is, the increased likelihood (versus random) of this sample being in the category.

Bayesian Score: The standard Laplacian-modified Bayesian score.

## Structural Similar Compounds

| Name               | NONYLPHENOL                                                                      | ACETIC ACID; 2-CHLORO-5-NITROPHENYL ESTER | CYCLOHEXYNYL-4-PHENOL |
|--------------------|----------------------------------------------------------------------------------|-------------------------------------------|-----------------------|
| Structure          |                                                                                  |                                           |                       |
| Actual Endpoint    | Moderate_Severe                                                                  | Mild                                      | Moderate_Severe       |
| Predicted Endpoint | Moderate_Severe                                                                  | Mild                                      | Moderate_Severe       |
| Similarity         | 0.291                                                                            | 0.262                                     | 0.259                 |
| Reference          | In: Environ. and Human Safety of Major Surfactants; Talmage; S; 1994 Lewis Publi | 28ZPAK-;92;72                             | AIHAAP 30;470;69      |

## Model Applicability

Missing features are fingerprint features in the query molecule not found in the training set.

1. All descriptors are in range.

## Feature Contribution

| Top features for Moderate_Severe |             |                  |       |                                 |
|----------------------------------|-------------|------------------|-------|---------------------------------|
| Fingerprint                      | Bit         | Structure/Smiles | Score | Moderate_Severe in training set |
| FCFP_8                           | -1066794953 |                  | 0.380 | 13 out of 13                    |

| FCFP_8                | -497728148  | 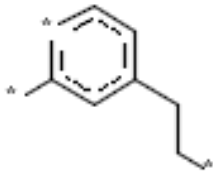   | 0.357  | 24 out of 25                       |
|-----------------------|-------------|---------------------------------------------------------------------------------------|--------|------------------------------------|
| FCFP_8                | -158888774  |    | 0.357  | 24 out of 25                       |
| Top Features for Mild |             |                                                                                       |        |                                    |
| Fingerprint           | Bit         | Structure/Smiles                                                                      | Score  | Moderate_Severe<br>in training set |
| FCFP_8                | -620155118  |    | -0.596 | 9 out of 26                        |
| FCFP_8                | -1861645784 |   | -0.596 | 9 out of 26                        |
| FCFP_8                | 565114151   |  | -0.506 | 0 out of 1                         |



$C_{22}H_{22}N_4O_3$

Molecular Weight: 390.43508

ALogP: 1.807

Rotatable Bonds: 6

Acceptors: 3

Donors: 4

### Model Prediction

Prediction: Moderate\_Severe

Probability: 0.856

Enrichment: 1.243

Bayesian Score: 1.167

Prediction: Positive if the Bayesian score is above the estimated best cutoff value.

Probability: The estimated probability that the sample is in the category.

Enrichment: An estimate of enrichment, that is, the increased likelihood (versus random) of this sample being in the category.

Bayesian Score: The standard Laplacian-modified Bayesian score.

### Structural Similar Compounds

| Name               | ACETANILIDE; 4'-(2-HYDROXYETHYLSULFONYL)- | 2-NAPHTHALENE SULFONIC ACID;5-AMINO- | 1-AMINO-4-BENZOYLAMINO-ANTHRAQUINONE |
|--------------------|-------------------------------------------|--------------------------------------|--------------------------------------|
| Structure          |                                           |                                      |                                      |
| Actual Endpoint    | Mild                                      | Mild                                 | Mild                                 |
| Predicted Endpoint | Mild                                      | Mild                                 | Mild                                 |
| Similarity         | 0.288                                     | 0.280                                | 0.269                                |
| Reference          | 28ZPAK-;201;72                            | 28ZPAK-;187;72                       | 28ZPAK-;124;72                       |

### Model Applicability

Missing features are fingerprint features in the query molecule not found in the training set.

1. All descriptors are in range.

### Feature Contribution

#### Top features for Moderate\_Severe

| Fingerprint | Bit        | Structure/Smiles | Score | Moderate_Severe in training set |
|-------------|------------|------------------|-------|---------------------------------|
| FCFP_8      | -547731249 |                  | 0.295 | 3 out of 3                      |

| FCFP_8                | -1272709286 |    | 0.287  | 234 out of 266                     |
|-----------------------|-------------|---------------------------------------------------------------------------------------|--------|------------------------------------|
| FCFP_8                | 155061250   |    | 0.258  | 2 out of 2                         |
| Top Features for Mild |             |                                                                                       |        |                                    |
| Fingerprint           | Bit         | Structure/Smiles                                                                      | Score  | Moderate_Severe<br>in training set |
| FCFP_8                | -1549103449 |    | -0.502 | 2 out of 6                         |
| FCFP_8                | 1011367537  |   | -0.327 | 4 out of 9                         |
| FCFP_8                | -1320007763 |  | -0.314 | 19 out of 40                       |

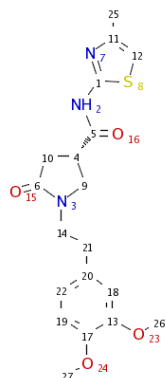

$C_{19}H_{23}N_3O_4S$

Molecular Weight: 389.46862

ALogP: 1.461

Rotatable Bonds: 7

Acceptors: 5

Donors: 1

## Model Prediction

Prediction: Mild

Probability: 0.835

Enrichment: 1.211

Bayesian Score: -0.462

Prediction: Positive if the Bayesian score is above the estimated best cutoff value.

Probability: The estimated probability that the sample is in the category.

Enrichment: An estimate of enrichment, that is, the increased likelihood (versus random) of this sample being in the category.

Bayesian Score: The standard Laplacian-modified Bayesian score.

## Structural Similar Compounds

| Name               | ISOQUINOLINE; 1;2;3;4-TETRAHYDRO-2-OCTANOYL- | NPE 10                                                                           | NPE 12                                                                           |
|--------------------|----------------------------------------------|----------------------------------------------------------------------------------|----------------------------------------------------------------------------------|
| Structure          |                                              |                                                                                  |                                                                                  |
| Actual Endpoint    | Mild                                         | Moderate_Severe                                                                  | Moderate_Severe                                                                  |
| Predicted Endpoint | Mild                                         | Moderate_Severe                                                                  | Moderate_Severe                                                                  |
| Similarity         | 0.340                                        | 0.327                                                                            | 0.327                                                                            |
| Reference          | NTIS** AD-A042-527                           | In: Environ. and Human Safety of Major Surfactants; Talmage; S; 1994 Lewis Publi | In: Environ. and Human Safety of Major Surfactants; Talmage; S; 1994 Lewis Publi |

## Model Applicability

Missing features are fingerprint features in the query molecule not found in the training set.

1. All descriptors are in range.

## Feature Contribution

### Top features for Moderate\_Severe

| Fingerprint | Bit        | Structure/Smiles | Score | Moderate_Severe in training set |
|-------------|------------|------------------|-------|---------------------------------|
| FCFP_8      | 1985089045 |                  | 0.386 | 16 out of 16                    |

| FCFP_8                | -497728148  | 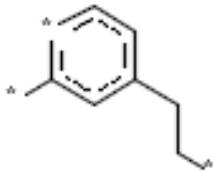   | 0.357  | 24 out of 25                       |
|-----------------------|-------------|---------------------------------------------------------------------------------------|--------|------------------------------------|
| FCFP_8                | -124655670  |    | 0.261  | 14 out of 16                       |
| Top Features for Mild |             |                                                                                       |        |                                    |
| Fingerprint           | Bit         | Structure/Smiles                                                                      | Score  | Moderate_Severe<br>in training set |
| FCFP_8                | -1977641857 |    | -0.779 | 4 out of 15                        |
| FCFP_8                | -2005207466 |  | -0.506 | 0 out of 1                         |
| FCFP_8                | 206055935   |  | -0.506 | 0 out of 1                         |



$C_{23}H_{26}N_2O_6$

Molecular Weight: 426.46234

ALogP: 1.967

Rotatable Bonds: 7

Acceptors: 6

Donors: 1

## Model Prediction

Prediction: **Moderate\_Severe**

Probability: 0.840

Enrichment: 1.219

Bayesian Score: -0.215

Prediction: Positive if the Bayesian score is above the estimated best cutoff value.

Probability: The estimated probability that the sample is in the category.

Enrichment: An estimate of enrichment, that is, the increased likelihood (versus random) of this sample being in the category.

Bayesian Score: The standard Laplacian-modified Bayesian score.

## Structural Similar Compounds

| Name               | p-Acetophenetidine; 3'-(bis(2-hydroxyethyl)amino)-                    | P-ACETOPHENETIDIDE;3-NITRO- | ACETANILIDE; 3'-AMINO-4'-ETHOXY- |
|--------------------|-----------------------------------------------------------------------|-----------------------------|----------------------------------|
| Structure          |                                                                       |                             |                                  |
| Actual Endpoint    | Moderate_Severe                                                       | Moderate_Severe             | Mild                             |
| Predicted Endpoint | Moderate_Severe                                                       | Moderate_Severe             | Mild                             |
| Similarity         | 0.444                                                                 | 0.409                       | 0.395                            |
| Reference          | Prehled Prumyslove Toxikologie; Organicke Latky; Marhold; J. -;645;86 | 28ZPAK-;115;72              | 28ZPAK 115;72                    |

## Model Applicability

Missing features are fingerprint features in the query molecule not found in the training set.

1. All descriptors are in range.

## Feature Contribution

### Top features for Moderate\_Severe

| Fingerprint | Bit       | Structure/Smiles | Score | Moderate_Severe in training set |
|-------------|-----------|------------------|-------|---------------------------------|
| FCFP_8      | 365650923 |                  | 0.388 | 17 out of 17                    |



| FCFP_8                | 1985089045  | 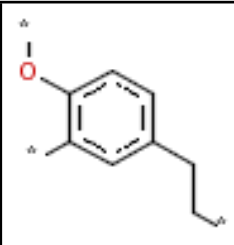    | 0.386  | 16 out of 16                       |
|-----------------------|-------------|---------------------------------------------------------------------------------------|--------|------------------------------------|
| FCFP_8                | -497728148  |    | 0.357  | 24 out of 25                       |
| Top Features for Mild |             |                                                                                       |        |                                    |
| Fingerprint           | Bit         | Structure/Smiles                                                                      | Score  | Moderate_Severe<br>in training set |
| FCFP_8                | -1977641857 |    | -0.779 | 4 out of 15                        |
| FCFP_8                | 206055935   |   | -0.506 | 0 out of 1                         |
| FCFP_8                | -2005207466 |  | -0.506 | 0 out of 1                         |



$C_{24}H_{27}N_5O_4$

Molecular Weight: 449.50228

ALogP: 1.731

Rotatable Bonds: 9

Acceptors: 6

Donors: 1

## Model Prediction

Prediction: Mild

Probability: 0.692

Enrichment: 1.004

Bayesian Score: -3.557

Prediction: Positive if the Bayesian score is above the estimated best cutoff value.

Probability: The estimated probability that the sample is in the category.

Enrichment: An estimate of enrichment, that is, the increased likelihood (versus random) of this sample being in the category.

Bayesian Score: The standard Laplacian-modified Bayesian score.

## Structural Similar Compounds

| Name               | p-Acetophenetidine; 3'-(bis(2-hydroxyethyl)amino)-                    | O-ANISIDINE; ACETOACETYL | ISOQUINOLINE; 1;2;3;4-TETRAHYDRO-2-OCTANOYL- |
|--------------------|-----------------------------------------------------------------------|--------------------------|----------------------------------------------|
| Structure          |                                                                       |                          |                                              |
| Actual Endpoint    | Moderate_Severe                                                       | Mild                     | Mild                                         |
| Predicted Endpoint | Moderate_Severe                                                       | Mild                     | Mild                                         |
| Similarity         | 0.316                                                                 | 0.315                    | 0.315                                        |
| Reference          | Prehled Prumyslove Toxikologie; Organicke Latky; Marhold; J. -;645;86 | 28ZPAK-;116;72           | NTIS** AD-A042-527                           |

## Model Applicability

Missing features are fingerprint features in the query molecule not found in the training set.

1. Missing Feature: FCFP\_8 -2049666792 [\*]Cn1:c:[\*]:[\*]:n:1
2. Missing Feature: FCFP\_8 -124685461 [\*]1:[\*]:n:c:n:1
3. Missing Feature: FCFP\_8 906560188 [\*]:c(:[\*])Cn(:[\*]):[\*]

## Feature Contribution

| Top features for Moderate_Severe |            |                  |       |                                 |
|----------------------------------|------------|------------------|-------|---------------------------------|
| Fingerprint                      | Bit        | Structure/Smiles | Score | Moderate_Severe in training set |
| FCFP_8                           | 1985089045 |                  | 0.386 | 16 out of 16                    |

| FCFP_8                | -497728148  | 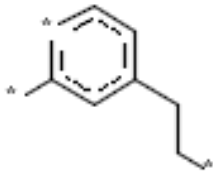   | 0.357  | 24 out of 25                       |
|-----------------------|-------------|---------------------------------------------------------------------------------------|--------|------------------------------------|
| FCFP_8                | 1028934530  |    | 0.258  | 2 out of 2                         |
| Top Features for Mild |             |                                                                                       |        |                                    |
| Fingerprint           | Bit         | Structure/Smiles                                                                      | Score  | Moderate_Severe<br>in training set |
| FCFP_8                | 4427049     |    | -1.291 | 0 out of 4                         |
| FCFP_8                | -1977641857 |   | -0.779 | 4 out of 15                        |
| FCFP_8                | -790336137  |  | -0.506 | 0 out of 1                         |

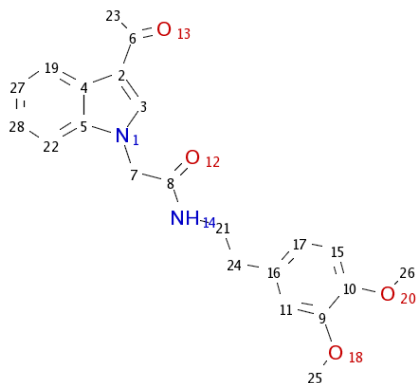

$C_{22}H_{24}N_2O_4$

Molecular Weight: 380.43696

ALogP: 3.001

Rotatable Bonds: 8

Acceptors: 4

Donors: 1

## Model Prediction

Prediction: Mild

Probability: 0.835

Enrichment: 1.212

Bayesian Score: -0.436

Prediction: Positive if the Bayesian score is above the estimated best cutoff value.

Probability: The estimated probability that the sample is in the category.

Enrichment: An estimate of enrichment, that is, the increased likelihood (versus random) of this sample being in the category.

Bayesian Score: The standard Laplacian-modified Bayesian score.

## Structural Similar Compounds

| Name               | 7H-BENZIMIDAZO(2;1-a)BENZ(de)ISOQUINOLIN-7-ONE; 10-METHOXY- | CARBAMIC ACID; METHYL-; 1-(5;6;7;8-TETRAHYDRO)NAPHTHYL ESTER | ANTHRAQUINONE;1;5-DIMETHOXY |
|--------------------|-------------------------------------------------------------|--------------------------------------------------------------|-----------------------------|
| Structure          |                                                             |                                                              |                             |
| Actual Endpoint    | Mild                                                        | Mild                                                         | Mild                        |
| Predicted Endpoint | Mild                                                        | Mild                                                         | Mild                        |
| Similarity         | 0.333                                                       | 0.327                                                        | 0.311                       |
| Reference          | 28ZPAK 147;72                                               | 28ZPAK-;163;72                                               | 28ZPAK-;113;72              |

## Model Applicability

Missing features are fingerprint features in the query molecule not found in the training set.

- Missing Feature: FCFP\_8 -1645149908 [\*]C(=[\*])Cn(:[\*]):[\*]

## Feature Contribution

### Top features for Moderate\_Severe

| Fingerprint | Bit        | Structure/Smiles | Score | Moderate_Severe in training set |
|-------------|------------|------------------|-------|---------------------------------|
| FCFP_8      | 1985089045 |                  | 0.386 | 16 out of 16                    |

| FCFP_8                | -497728148  | 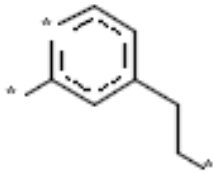   | 0.357  | 24 out of 25                       |
|-----------------------|-------------|---------------------------------------------------------------------------------------|--------|------------------------------------|
| FCFP_8                | -547731249  |    | 0.295  | 3 out of 3                         |
| Top Features for Mild |             |                                                                                       |        |                                    |
| Fingerprint           | Bit         | Structure/Smiles                                                                      | Score  | Moderate_Severe<br>in training set |
| FCFP_8                | -306856457  |    | -0.841 | 0 out of 2                         |
| FCFP_8                | -1977641857 |   | -0.779 | 4 out of 15                        |
| FCFP_8                | -1320007763 |  | -0.314 | 19 out of 40                       |


 $C_{23}H_{26}N_4O_2$ 

Molecular Weight: 390.47814

ALogP: 2.702

Rotatable Bonds: 5

Acceptors: 2

Donors: 2

## Model Prediction

Prediction: Mild

Probability: 0.717

Enrichment: 1.041

Bayesian Score: -3.210

Prediction: Positive if the Bayesian score is above the estimated best cutoff value.

Probability: The estimated probability that the sample is in the category.

Enrichment: An estimate of enrichment, that is, the increased likelihood (versus random) of this sample being in the category.

Bayesian Score: The standard Laplacian-modified Bayesian score.

## Structural Similar Compounds

| Name               | ISOQUINOLINE; 1;2;3;4-TETRAHYDRO-2-OCTANOYL- | ETHANOL; 2-(BENZYLOXY)- | 2-NAPHTHALENE SULFONIC ACID;5-AMINO- |
|--------------------|----------------------------------------------|-------------------------|--------------------------------------|
| Structure          |                                              |                         |                                      |
| Actual Endpoint    | Mild                                         | Moderate_Severe         | Mild                                 |
| Predicted Endpoint | Mild                                         | Moderate_Severe         | Mild                                 |
| Similarity         | 0.367                                        | 0.304                   | 0.286                                |
| Reference          | NTIS** AD-A042-527                           | AJOPAA 29;1363;46       | 28ZPAK-;187;72                       |

## Model Applicability

Missing features are fingerprint features in the query molecule not found in the training set.

- Missing Feature: FCFP\_8 203707511 [\*]C[c]1:n:[\*]:[\*]:[c]:1[\*]

## Feature Contribution

### Top features for Moderate\_Severe

| Fingerprint | Bit       | Structure/Smiles | Score | Moderate_Severe in training set |
|-------------|-----------|------------------|-------|---------------------------------|
| FCFP_8      | 159404153 |                  | 0.326 | 15 out of 16                    |

| FCFP_8                | -1272709286 |    | 0.287  | 234 out of 266                     |
|-----------------------|-------------|---------------------------------------------------------------------------------------|--------|------------------------------------|
| FCFP_8                | 155061250   |    | 0.258  | 2 out of 2                         |
| Top Features for Mild |             |                                                                                       |        |                                    |
| Fingerprint           | Bit         | Structure/Smiles                                                                      | Score  | Moderate_Severe<br>in training set |
| FCFP_8                | 907036844   |    | -0.598 | 1 out of 4                         |
| FCFP_8                | 599018404   |  | -0.506 | 0 out of 1                         |
| FCFP_8                | 206055935   |  | -0.506 | 0 out of 1                         |



$C_{28}H_{34}N_5O_2$

Molecular Weight: 472.60186

ALogP: 1.567

Rotatable Bonds: 6

Acceptors: 2

Donors: 3

## Model Prediction

Prediction: Mild

Probability: 0.754

Enrichment: 1.095

Bayesian Score: -2.624

Prediction: Positive if the Bayesian score is above the estimated best cutoff value.

Probability: The estimated probability that the sample is in the category.

Enrichment: An estimate of enrichment, that is, the increased likelihood (versus random) of this sample being in the category.

Bayesian Score: The standard Laplacian-modified Bayesian score.

## Structural Similar Compounds

| Name               | ISOQUINOLINE; 1;2;3;4-TETRAHYDRO-2-OCTANOYL- | CARBAMIC ACID; METHYL-; 1-(5;6;7;8-TETRAHYDRO)NAPHTHYL ESTER | ETHANOL; 2-(BENZYLOXY)- |
|--------------------|----------------------------------------------|--------------------------------------------------------------|-------------------------|
| Structure          |                                              |                                                              |                         |
| Actual Endpoint    | Mild                                         | Mild                                                         | Moderate_Severe         |
| Predicted Endpoint | Mild                                         | Mild                                                         | Moderate_Severe         |
| Similarity         | 0.283                                        | 0.246                                                        | 0.228                   |
| Reference          | NTIS** AD-A042-527                           | 28ZPAK-;163;72                                               | AJOPAA 29;1363;46       |

## Model Applicability

Missing features are fingerprint features in the query molecule not found in the training set.

1. Missing Feature: FCFP\_8 10 [\*][NH+]([\*])([\*])
2. Missing Feature: FCFP\_8 203707511 [\*]C[c]1:n:[\*]:[\*]:[c]:1[\*]
3. Missing Feature: FCFP\_8 -1853714334 [\*]C[NH+](C[\*])C[\*]
4. Missing Feature: FCFP\_8 1155241219 [\*]CC[NH+]([\*])([\*])

## Feature Contribution

### Top features for Moderate\_Severe

| Fingerprint | Bit       | Structure/Smiles | Score | Moderate_Severe in training set |
|-------------|-----------|------------------|-------|---------------------------------|
| FCFP_8      | 159404153 |                  | 0.326 | 15 out of 16                    |



| FCFP_8                | -1272709286 |    | 0.287  | 234 out of 266                     |
|-----------------------|-------------|---------------------------------------------------------------------------------------|--------|------------------------------------|
| FCFP_8                | 1673997923  |    | 0.258  | 2 out of 2                         |
| Top Features for Mild |             |                                                                                       |        |                                    |
| Fingerprint           | Bit         | Structure/Smiles                                                                      | Score  | Moderate_Severe<br>in training set |
| FCFP_8                | 907036844   |    | -0.598 | 1 out of 4                         |
| FCFP_8                | -146015125  |  | -0.506 | 0 out of 1                         |
| FCFP_8                | 599018404   |  | -0.506 | 0 out of 1                         |



$C_{25}H_{28}ClN_5O_2$

Molecular Weight: 465.97512

ALogP: 3.413

Rotatable Bonds: 4

Acceptors: 3

Donors: 2

## Model Prediction

Prediction: Mild

Probability: 0.827

Enrichment: 1.201

Bayesian Score: -0.773

Prediction: Positive if the Bayesian score is above the estimated best cutoff value.

Probability: The estimated probability that the sample is in the category.

Enrichment: An estimate of enrichment, that is, the increased likelihood (versus random) of this sample being in the category.

Bayesian Score: The standard Laplacian-modified Bayesian score.

## Structural Similar Compounds

| Name               | ETHANOL;2-(P-CHLOROPHENOXY)- | ISOQUINOLINE; 1;2;3;4-TETRAHYDRO-2-OCTANOYL- | ETHANOL; 2;2'-(PHENYLIMINO)DI- |
|--------------------|------------------------------|----------------------------------------------|--------------------------------|
| Structure          |                              |                                              |                                |
| Actual Endpoint    | Moderate_Severe              | Mild                                         | Moderate_Severe                |
| Predicted Endpoint | Moderate_Severe              | Mild                                         | Moderate_Severe                |
| Similarity         | 0.268                        | 0.267                                        | 0.264                          |
| Reference          | 28ZPAK-;81;72                | NTIS** AD-A042-527                           | UCDS** 6/13/60                 |

## Model Applicability

Missing features are fingerprint features in the query molecule not found in the training set.

- Missing Feature: FCFP\_8 203707511 [\*]C[c]1:n:[\*]:[\*]:[c]:1[\*]

## Feature Contribution

### Top features for Moderate\_Severe

| Fingerprint | Bit       | Structure/Smiles | Score | Moderate_Severe in training set |
|-------------|-----------|------------------|-------|---------------------------------|
| FCFP_8      | 159404153 |                  | 0.326 | 15 out of 16                    |

| FCFP_8                | -745491832  | 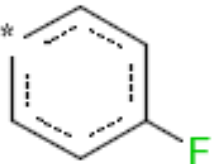   | 0.305  | 29 out of 32                       |
|-----------------------|-------------|---------------------------------------------------------------------------------------|--------|------------------------------------|
| FCFP_8                | -1272709286 |    | 0.287  | 234 out of 266                     |
| Top Features for Mild |             |                                                                                       |        |                                    |
| Fingerprint           | Bit         | Structure/Smiles                                                                      | Score  | Moderate_Severe<br>in training set |
| FCFP_8                | 907036844   |    | -0.598 | 1 out of 4                         |
| FCFP_8                | 599018404   |  | -0.506 | 0 out of 1                         |
| FCFP_8                | -2005207466 |  | -0.506 | 0 out of 1                         |

## MOST ACTIVE.mol



$C_{25}H_{28}FN_2O$

Molecular Weight: 391.50102

ALogP: 3.098

Rotatable Bonds: 5

Acceptors: 1

Donors: 2

## Model Prediction

Prediction: Mild

Probability: 0.764

Enrichment: 1.108

Bayesian Score: -2.447

Prediction: Positive if the Bayesian score is above the estimated best cutoff value.

Probability: The estimated probability that the sample is in the category.

Enrichment: An estimate of enrichment, that is, the increased likelihood (versus random) of this sample being in the category.

Bayesian Score: The standard Laplacian-modified Bayesian score.

## TOPKAT\_Ocular\_Irritancy\_Mild\_vs\_Moderate\_Severe

### Structural Similar Compounds

| Name               | 7H-Benz(de)anthracen-7-one; 3;9-dibromo-                               | Indole-2;3-dione; 5-bromo-                                            | SULFOXIDE; p-CHLOROPHENYL METHYL |
|--------------------|------------------------------------------------------------------------|-----------------------------------------------------------------------|----------------------------------|
| Structure          |                                                                        |                                                                       |                                  |
| Actual Endpoint    | Mild                                                                   | Moderate_Severe                                                       | Moderate_Severe                  |
| Predicted Endpoint | Mild                                                                   | Moderate_Severe                                                       | Moderate_Severe                  |
| Similarity         | 0.320                                                                  | 0.319                                                                 | 0.310                            |
| Reference          | Prehled Prumyslove Toxikologie; Organicke Latky; Marhold; J. pp 567;86 | Prehled Prumyslove Toxikologie; Organicke Latky; Marhold; J. -;821;86 | NTIS** AD-A082-824               |

### Model Applicability

Missing features are fingerprint features in the query molecule not found in the training set.

- Missing Feature: FCFP\_8 10 [\*][NH+]([\*])([\*])
- Missing Feature: FCFP\_8 -1853714334 [\*]C[NH+](C[\*])C[\*]
- Missing Feature: FCFP\_8 1155241219 [\*]CC[NH+]([\*])([\*])
- Missing Feature: FCFP\_8 -680623486 [\*][NH+]([\*])[C@H](C)[c](:[\*]):[\*]

### Feature Contribution

| Top features for Moderate_Severe |           |                  |       |                                 |
|----------------------------------|-----------|------------------|-------|---------------------------------|
| Fingerprint                      | Bit       | Structure/Smiles | Score | Moderate_Severe in training set |
| FCFP_8                           | 907096426 |                  | 0.334 | 5 out of 5                      |

| FCFP_8                | -745491832  | 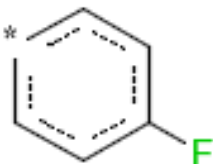   | 0.305  | 29 out of 32                       |
|-----------------------|-------------|---------------------------------------------------------------------------------------|--------|------------------------------------|
| FCFP_8                | 427906732   |    | 0.295  | 3 out of 3                         |
| Top Features for Mild |             |                                                                                       |        |                                    |
| Fingerprint           | Bit         | Structure/Smiles                                                                      | Score  | Moderate_Severe<br>in training set |
| FCFP_8                | -1700637232 |    | -1.334 | 1 out of 10                        |
| FCFP_8                | -384723139  |  | -0.418 | 4 out of 10                        |
| FCFP_8                | -1320007763 |  | -0.314 | 19 out of 40                       |

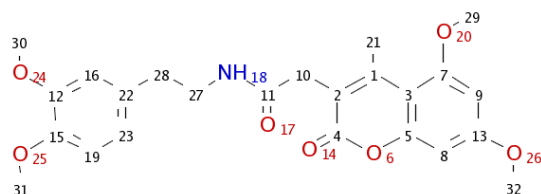

$C_{24}H_{27}NO_7$

Molecular Weight: 441.47368

ALogP: 3.388

Rotatable Bonds: 9

Acceptors: 7

Donors: 1

## Model Prediction

Prediction: Moderate

Probability: 0.633

Enrichment: 1.020

Bayesian Score: -1.689

Prediction: Positive if the Bayesian score is above the estimated best cutoff value.

Probability: The estimated probability that the sample is in the category.

Enrichment: An estimate of enrichment, that is, the increased likelihood (versus random) of this sample being in the category.

Bayesian Score: The standard Laplacian-modified Bayesian score.

## Structural Similar Compounds

| Name               | NPE 12                                                                           | NPE 10                                                                           | NPE 9                                                                            |
|--------------------|----------------------------------------------------------------------------------|----------------------------------------------------------------------------------|----------------------------------------------------------------------------------|
| Structure          |                                                                                  |                                                                                  |                                                                                  |
| Actual Endpoint    | Severe                                                                           | Severe                                                                           | Moderate                                                                         |
| Predicted Endpoint | Severe                                                                           | Severe                                                                           | Severe                                                                           |
| Similarity         | 0.370                                                                            | 0.370                                                                            | 0.370                                                                            |
| Reference          | In: Environ. and Human Safety of Major Surfactants; Talmage; S; 1994 Lewis Publi | In: Environ. and Human Safety of Major Surfactants; Talmage; S; 1994 Lewis Publi | In: Environ. and Human Safety of Major Surfactants; Talmage; S; 1994 Lewis Publi |

## Model Applicability

Missing features are fingerprint features in the query molecule not found in the training set.

1. All descriptors are in range.

## Feature Contribution

| Top features for Severe |           |                  |       |                        |
|-------------------------|-----------|------------------|-------|------------------------|
| Fingerprint             | Bit       | Structure/Smiles | Score | Severe in training set |
| SCFP_10                 | 125999298 |                  | 0.425 | 7 out of 7             |

| SCFP_10                   | 130348166   | 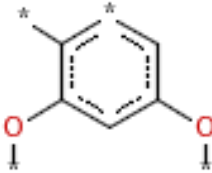   | 0.381  | 4 out of 4             |
|---------------------------|-------------|---------------------------------------------------------------------------------------|--------|------------------------|
| SCFP_10                   | -1272709286 |    | 0.237  | 24 out of 31           |
| Top Features for Moderate |             |                                                                                       |        |                        |
| Fingerprint               | Bit         | Structure/Smiles                                                                      | Score  | Severe in training set |
| SCFP_10                   | 2005026407  |    | -0.792 | 0 out of 2             |
| SCFP_10                   | -587569116  |  | -0.613 | 11 out of 35           |
| SCFP_10                   | 1256995004  |  | -0.477 | 12 out of 33           |

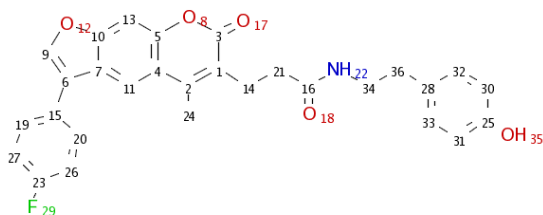

$C_{29}H_{24}FNO_5$

Molecular Weight: 485.50296

ALogP: 5.695

Rotatable Bonds: 7

Acceptors: 4

Donors: 2

## Model Prediction

Prediction: Moderate

Probability: 0.534

Enrichment: 0.861

Bayesian Score: -3.393

Prediction: Positive if the Bayesian score is above the estimated best cutoff value.

Probability: The estimated probability that the sample is in the category.

Enrichment: An estimate of enrichment, that is, the increased likelihood (versus random) of this sample being in the category.

Bayesian Score: The standard Laplacian-modified Bayesian score.

## Structural Similar Compounds

| Name               | NONYLPHENOL                                                                      | CYCLOHEXENYL-4-PHENOL | RESORCINOL; MONOACETATE |
|--------------------|----------------------------------------------------------------------------------|-----------------------|-------------------------|
| Structure          |                                                                                  |                       |                         |
| Actual Endpoint    | Severe                                                                           | Severe                | Severe                  |
| Predicted Endpoint | Severe                                                                           | Severe                | Severe                  |
| Similarity         | 0.291                                                                            | 0.259                 | 0.254                   |
| Reference          | In: Environ. and Human Safety of Major Surfactants; Talmage; S; 1994 Lewis Publi | AIHAAP 30;470;69      | JAPMA8 46;185;57        |

## Model Applicability

Missing features are fingerprint features in the query molecule not found in the training set.

1. All descriptors are in range.

## Feature Contribution

### Top features for Severe

| Fingerprint | Bit        | Structure/Smiles | Score | Severe in training set |
|-------------|------------|------------------|-------|------------------------|
| SCFP_10     | 1689050571 |                  | 0.306 | 2 out of 2             |



| SCFP_10                   | 611156666   | 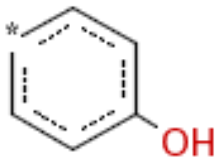   | 0.303  | 20 out of 24           |
|---------------------------|-------------|---------------------------------------------------------------------------------------|--------|------------------------|
| SCFP_10                   | -1850560426 |    | 0.291  | 6 out of 7             |
| Top Features for Moderate |             |                                                                                       |        |                        |
| Fingerprint               | Bit         | Structure/Smiles                                                                      | Score  | Severe in training set |
| SCFP_10                   | 2005026407  |    | -0.792 | 0 out of 2             |
| SCFP_10                   | -587569116  |  | -0.613 | 11 out of 35           |
| SCFP_10                   | -496111702  |  | -0.536 | 1 out of 4             |



$C_{22}H_{22}N_4O_3$

Molecular Weight: 390.43508

ALogP: 1.807

Rotatable Bonds: 6

Acceptors: 3

Donors: 4

## Model Prediction

Prediction: Moderate

Probability: 0.438

Enrichment: 0.706

Bayesian Score: -4.739

Prediction: Positive if the Bayesian score is above the estimated best cutoff value.

Probability: The estimated probability that the sample is in the category.

Enrichment: An estimate of enrichment, that is, the increased likelihood (versus random) of this sample being in the category.

Bayesian Score: The standard Laplacian-modified Bayesian score.

## Structural Similar Compounds

| Name               | Anthranilic acid; N-methyl-                                           | 1;5-NAPHTHALENEDISULFONIC ACID;2-AMINO- | INDOLE          |
|--------------------|-----------------------------------------------------------------------|-----------------------------------------|-----------------|
| Structure          |                                                                       |                                         |                 |
| Actual Endpoint    | Moderate                                                              | Moderate                                | Severe          |
| Predicted Endpoint | Moderate                                                              | Moderate                                | Severe          |
| Similarity         | 0.265                                                                 | 0.265                                   | 0.261           |
| Reference          | Prehled Prumyslove Toxikologie; Organické Latky; Marhold; J. -;741;86 | 28ZPAK-;188;72                          | AIHAAP 23;95;62 |

## Model Applicability

Missing features are fingerprint features in the query molecule not found in the training set.

- Missing Feature: SCFP\_10 -1946889102 [\*]C[C@H](N[\*])C(=[\*])[\*]

## Feature Contribution

| Top features for Severe |            |                  |       |                        |
|-------------------------|------------|------------------|-------|------------------------|
| Fingerprint             | Bit        | Structure/Smiles | Score | Severe in training set |
| SCFP_10                 | -496201075 |                  | 0.384 | 12 out of 13           |

| SCFP_10                   | -673674794  | 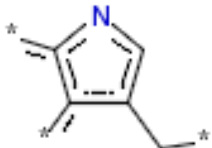   | 0.381  | 4 out of 4             |
|---------------------------|-------------|---------------------------------------------------------------------------------------|--------|------------------------|
| SCFP_10                   | 1188101983  |    | 0.306  | 2 out of 2             |
| Top Features for Moderate |             |                                                                                       |        |                        |
| Fingerprint               | Bit         | Structure/Smiles                                                                      | Score  | Severe in training set |
| SCFP_10                   | -1072897324 |    | -0.795 | 3 out of 13            |
| SCFP_10                   | 2005026407  |  | -0.792 | 0 out of 2             |
| SCFP_10                   | 1655488245  |  | -0.792 | 0 out of 2             |



$C_{23}H_{26}N_2O_6$

Molecular Weight: 426.46234

ALogP: 1.967

Rotatable Bonds: 7

Acceptors: 6

Donors: 1

## Model Prediction

Prediction: Moderate

Probability: 0.454

Enrichment: 0.733

Bayesian Score: -4.521

Prediction: Positive if the Bayesian score is above the estimated best cutoff value.

Probability: The estimated probability that the sample is in the category.

Enrichment: An estimate of enrichment, that is, the increased likelihood (versus random) of this sample being in the category.

Bayesian Score: The standard Laplacian-modified Bayesian score.

## Structural Similar Compounds

| Name               | p-Acetophenetidine; 3'-(bis(2-hydroxyethyl)amino)-                    | P-ACETOPHENETIDIDE;3-NITRO- | C12 APE 11                                                                       |
|--------------------|-----------------------------------------------------------------------|-----------------------------|----------------------------------------------------------------------------------|
| Structure          |                                                                       |                             |                                                                                  |
| Actual Endpoint    | Moderate                                                              | Moderate                    | Severe                                                                           |
| Predicted Endpoint | Moderate                                                              | Moderate                    | Severe                                                                           |
| Similarity         | 0.444                                                                 | 0.409                       | 0.370                                                                            |
| Reference          | Prehled Prumyslove Toxikologie; Organické Latky; Marhold; J. -;645;86 | 28ZPAK-;115;72              | In: Environ. and Human Safety of Major Surfactants; Talmage; S; 1994 Lewis Publi |

## Model Applicability

Missing features are fingerprint features in the query molecule not found in the training set.

1. All descriptors are in range.

## Feature Contribution

| Top features for Severe |           |                  |       |                        |
|-------------------------|-----------|------------------|-------|------------------------|
| Fingerprint             | Bit       | Structure/Smiles | Score | Severe in training set |
| SCFP_10                 | 125999298 |                  | 0.425 | 7 out of 7             |

| SCFP_10                   | -1272709286 | 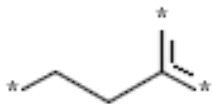         | 0.237  | 24 out of 31           |
|---------------------------|-------------|---------------------------------------------------------------------------------------------|--------|------------------------|
| SCFP_10                   | 1242547645  |          | 0.220  | 1 out of 1             |
| Top Features for Moderate |             |                                                                                             |        |                        |
| Fingerprint               | Bit         | Structure/Smiles                                                                            | Score  | Severe in training set |
| SCFP_10                   | 929361185   |  Chiral  | -1.012 | 2 out of 12            |
| SCFP_10                   | -2103400817 |  Chiral | -0.936 | 2 out of 11            |
| SCFP_10                   | -531283893  |        | -0.792 | 0 out of 2             |

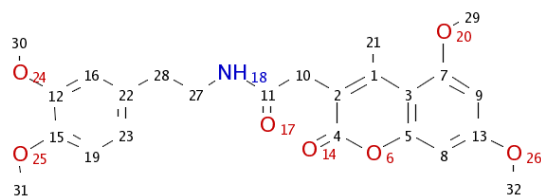

$C_{24}H_{27}NO_7$

Molecular Weight: 441.47368

ALogP: 3.388

Rotatable Bonds: 9

Acceptors: 7

Donors: 1

## Model Prediction

**Prediction: Irritant**

Probability: 0.999

Enrichment: 1.175

Bayesian Score: 0.888

Prediction: Positive if the Bayesian score is above the estimated best cutoff value.

Probability: The estimated probability that the sample is in the category.

Enrichment: An estimate of enrichment, that is, the increased likelihood (versus random) of this sample being in the category.

Bayesian Score: The standard Laplacian-modified Bayesian score.

## Structural Similar Compounds

| Name               | NPE 2                                                                            | NPE 13                                                                           | C12 APE 11                                                                       |
|--------------------|----------------------------------------------------------------------------------|----------------------------------------------------------------------------------|----------------------------------------------------------------------------------|
| Structure          |                                                                                  |                                                                                  |                                                                                  |
| Actual Endpoint    | Non-Irritant                                                                     | Irritant                                                                         | Irritant                                                                         |
| Predicted Endpoint | Irritant                                                                         | Irritant                                                                         | Irritant                                                                         |
| Similarity         | 0.370                                                                            | 0.370                                                                            | 0.370                                                                            |
| Reference          | In: Environ. and Human Safety of Major Surfactants; Talmage; S; 1994 Lewis Publi | In: Environ. and Human Safety of Major Surfactants; Talmage; S; 1994 Lewis Publi | In: Environ. and Human Safety of Major Surfactants; Talmage; S; 1994 Lewis Publi |

## Model Applicability

Missing features are fingerprint features in the query molecule not found in the training set.

- Missing Feature: ECFP\_10 1792159373 [\*]C(=C(C)[c](:[\*]):[\*])[\*]
- Missing Feature: ECFP\_10 -770854792 [\*]CC(=C([\*])[\*])C(=[\*])[\*]

## Feature Contribution

| Top features for Irritant |            |                  |       |                          |
|---------------------------|------------|------------------|-------|--------------------------|
| Fingerprint               | Bit        | Structure/Smiles | Score | Irritant in training set |
| ECFP_10                   | 2077607946 |                  | 0.195 | 14 out of 14             |

| ECFP_10                       | -560785749 | 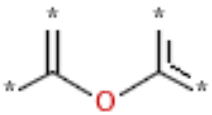   | 0.190  | 10 out of 10             |
|-------------------------------|------------|---------------------------------------------------------------------------------------|--------|--------------------------|
| ECFP_10                       | 1680623188 |    | 0.188  | 9 out of 9               |
| Top Features for Non-Irritant |            |                                                                                       |        |                          |
| Fingerprint                   | Bit        | Structure/Smiles                                                                      | Score  | Irritant in training set |
| ECFP_10                       | 2055803015 |    | -0.323 | 5 out of 9               |
| ECFP_10                       | -570915357 |  | -0.270 | 1 out of 2               |
| ECFP_10                       | 1573945311 |  | -0.270 | 1 out of 2               |


 $C_{25}H_{29}N_3O_4$ 

Molecular Weight: 435.51546

ALogP: 2.831

Rotatable Bonds: 8

Acceptors: 4

Donors: 2

## Model Prediction

**Prediction: Irritant**

Probability: 1.000

Enrichment: 1.175

Bayesian Score: 2.582

Prediction: Positive if the Bayesian score is above the estimated best cutoff value.

Probability: The estimated probability that the sample is in the category.

Enrichment: An estimate of enrichment, that is, the increased likelihood (versus random) of this sample being in the category.

Bayesian Score: The standard Laplacian-modified Bayesian score.

## Structural Similar Compounds

| Name               | ISOQUINOLINE; 1;2;3;4-TETRAHYDRO-2-OCTANOYL- | CARBAMIC ACID; METHYL-; 1-(5;6;7;8-TETRAHYDRO)NAPHTHYL ESTER | QUINOLINE; 1;2;3;4-TETRAHYDRO-1-(2-METHYL-1-OXOPENTYL)- |
|--------------------|----------------------------------------------|--------------------------------------------------------------|---------------------------------------------------------|
| Structure          |                                              |                                                              |                                                         |
| Actual Endpoint    | Irritant                                     | Irritant                                                     | Irritant                                                |
| Predicted Endpoint | Irritant                                     | Irritant                                                     | Irritant                                                |
| Similarity         | 0.358                                        | 0.291                                                        | 0.281                                                   |
| Reference          | NTIS** AD-A042-527                           | 28ZPAK-;163;72                                               | NTIS** AD-A056-106                                      |

## Model Applicability

Missing features are fingerprint features in the query molecule not found in the training set.

- Missing Feature: ECFP\_10 979542842 [\*]C[c]1:n:[\*]:[\*]:[c]:1[\*]

## Feature Contribution

### Top features for Irritant

| Fingerprint | Bit        | Structure/Smiles | Score | Irritant in training set |
|-------------|------------|------------------|-------|--------------------------|
| ECFP_10     | 2077607946 |                  | 0.195 | 14 out of 14             |



| ECFP_10                       | -1102925512 | 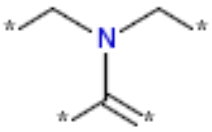   | 0.194  | 13 out of 13             |
|-------------------------------|-------------|---------------------------------------------------------------------------------------|--------|--------------------------|
| ECFP_10                       | 1680623188  |    | 0.188  | 9 out of 9               |
| Top Features for Non-Irritant |             |                                                                                       |        |                          |
| Fingerprint                   | Bit         | Structure/Smiles                                                                      | Score  | Irritant in training set |
| ECFP_10                       | -1789102870 |    | -0.422 | 48 out of 91             |
| ECFP_10                       | 497523368   |  | -0.134 | 2 out of 3               |
| ECFP_10                       | -1059365320 |  | -0.074 | 421 out of 560           |

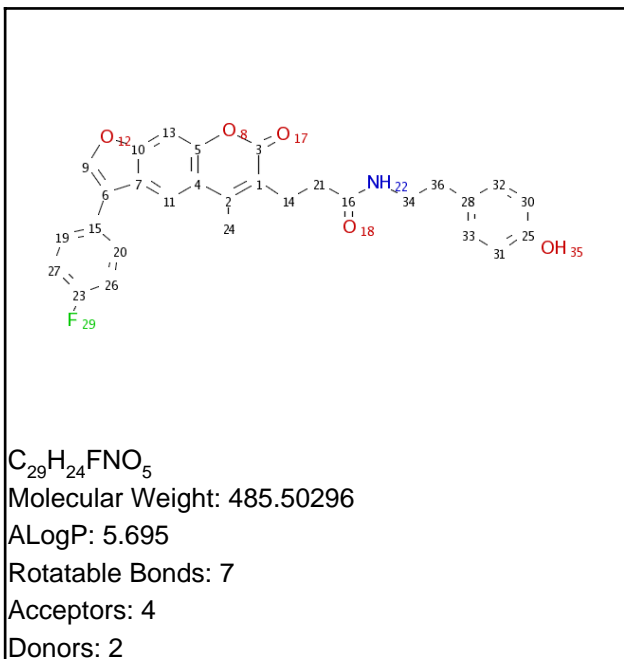

### Model Prediction

Prediction: Irritant

Probability: 0.999

Enrichment: 1.175

Bayesian Score: 1.400

Prediction: Positive if the Bayesian score is above the estimated best cutoff value.

Probability: The estimated probability that the sample is in the category.

Enrichment: An estimate of enrichment, that is, the increased likelihood (versus random) of this sample being in the category.

Bayesian Score: The standard Laplacian-modified Bayesian score.

### Structural Similar Compounds

| Name               | NONYLPHENOL                                                                         | ACETIC ACID; 2-CHLORO-5-NITROPHENYL ESTER                                           | CYCLOHEXENYL-4-PHENOL                                                               |
|--------------------|-------------------------------------------------------------------------------------|-------------------------------------------------------------------------------------|-------------------------------------------------------------------------------------|
| Structure          | 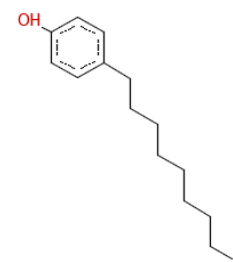 |  |  |
| Actual Endpoint    | Irritant                                                                            | Irritant                                                                            | Irritant                                                                            |
| Predicted Endpoint | Irritant                                                                            | Irritant                                                                            | Irritant                                                                            |
| Similarity         | 0.291                                                                               | 0.262                                                                               | 0.259                                                                               |
| Reference          | In: Environ. and Human Safety of Major Surfactants; Talmage; S; 1994 Lewis Publi    | 28ZPAK-;92;72                                                                       | AIHAAP 30;470;69                                                                    |

### Model Applicability

Missing features are fingerprint features in the query molecule not found in the training set.

- Missing Feature: ECFP\_10 -770854792 [\*]CC(=C([\*])([\*])C(=[\*])([\*])
- Missing Feature: ECFP\_10 1792159373 [\*]C(=C(C)[c]([\*])([\*])([\*])
- Missing Feature: ECFP\_10 -785659985 [\*][c]1:[\*]:[\*]:o:c:1

### Feature Contribution

| Top features for Irritant |             |                                                                                       |       |                          |
|---------------------------|-------------|---------------------------------------------------------------------------------------|-------|--------------------------|
| Fingerprint               | Bit         | Structure/Smiles                                                                      | Score | Irritant in training set |
| ECFP_10                   | -1046436026 | 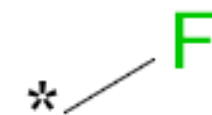 | 0.197 | 16 out of 16             |

| ECFP_10                       | -560785749  | 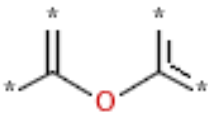   | 0.190  | 10 out of 10             |
|-------------------------------|-------------|---------------------------------------------------------------------------------------|--------|--------------------------|
| ECFP_10                       | 1731843802  |    | 0.182  | 7 out of 7               |
| Top Features for Non-Irritant |             |                                                                                       |        |                          |
| Fingerprint                   | Bit         | Structure/Smiles                                                                      | Score  | Irritant in training set |
| ECFP_10                       | -1789102870 |    | -0.422 | 48 out of 91             |
| ECFP_10                       | 1573945311  |  | -0.270 | 1 out of 2               |
| ECFP_10                       | -570915357  |  | -0.270 | 1 out of 2               |



$C_{22}H_{22}N_4O_3$

Molecular Weight: 390.43508

ALogP: 1.807

Rotatable Bonds: 6

Acceptors: 3

Donors: 4

## Model Prediction

**Prediction: Irritant**

Probability: 0.999

Enrichment: 1.174

Bayesian Score: 0.594

Prediction: Positive if the Bayesian score is above the estimated best cutoff value.

Probability: The estimated probability that the sample is in the category.

Enrichment: An estimate of enrichment, that is, the increased likelihood (versus random) of this sample being in the category.

Bayesian Score: The standard Laplacian-modified Bayesian score.

## Structural Similar Compounds

| Name               | ACETANILIDE; 4'-(2-HYDROXYETHYLSULFONYL)- | 2-NAPHTHALENE SULFONIC ACID;5-AMINO- | 1-AMINO-4-BENZOYLAMINO-ANTHRAQUINONE |
|--------------------|-------------------------------------------|--------------------------------------|--------------------------------------|
| Structure          |                                           |                                      |                                      |
| Actual Endpoint    | Irritant                                  | Irritant                             | Irritant                             |
| Predicted Endpoint | Irritant                                  | Irritant                             | Irritant                             |
| Similarity         | 0.288                                     | 0.280                                | 0.269                                |
| Reference          | 28ZPAK-;201;72                            | 28ZPAK-;187;72                       | 28ZPAK-;124;72                       |

## Model Applicability

Missing features are fingerprint features in the query molecule not found in the training set.

1. Missing Feature: ECFP\_10 -1693599735 [\*]C([\*])NC(=[\*])[\*]
2. Missing Feature: ECFP\_10 -867777309 [\*]NC(=O)C([\*])[\*]
3. Missing Feature: ECFP\_10 -410102202 [\*]C[C@H](N[\*])C(=[\*])[\*]
4. Missing Feature: ECFP\_10 -1020449580 [\*][c]1:[\*]:[\*]:n:c:1

## Feature Contribution

| Top features for Irritant |            |                  |       |                          |
|---------------------------|------------|------------------|-------|--------------------------|
| Fingerprint               | Bit        | Structure/Smiles | Score | Irritant in training set |
| ECFP_10                   | 1731843802 |                  | 0.182 | 7 out of 7               |

| ECFP_10                       | -2024509555 | 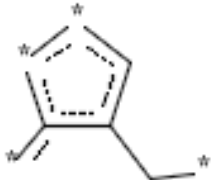   | 0.182  | 7 out of 7               |
|-------------------------------|-------------|---------------------------------------------------------------------------------------|--------|--------------------------|
| ECFP_10                       | -280629989  |    | 0.154  | 3 out of 3               |
| Top Features for Non-Irritant |             |                                                                                       |        |                          |
| Fingerprint                   | Bit         | Structure/Smiles                                                                      | Score  | Irritant in training set |
| ECFP_10                       | 1335833675  |    | -0.539 | 1 out of 3               |
| ECFP_10                       | -1789102870 |  | -0.422 | 48 out of 91             |
| ECFP_10                       | -1789838820 |  | -0.288 | 4 out of 7               |



$C_{19}H_{23}N_3O_4S$

Molecular Weight: 389.46862

ALogP: 1.461

Rotatable Bonds: 7

Acceptors: 5

Donors: 1

## Model Prediction

Prediction: Irritant

Probability: 1.000

Enrichment: 1.176

Bayesian Score: 3.189

Prediction: Positive if the Bayesian score is above the estimated best cutoff value.

Probability: The estimated probability that the sample is in the category.

Enrichment: An estimate of enrichment, that is, the increased likelihood (versus random) of this sample being in the category.

Bayesian Score: The standard Laplacian-modified Bayesian score.

## Structural Similar Compounds

| Name               | ISOQUINOLINE; 1;2;3;4-TETRAHYDRO-2-OCTANOYL- | NPE 4                                                                            | NPE 12                                                                           |
|--------------------|----------------------------------------------|----------------------------------------------------------------------------------|----------------------------------------------------------------------------------|
| Structure          |                                              |                                                                                  |                                                                                  |
| Actual Endpoint    | Irritant                                     | Irritant                                                                         | Irritant                                                                         |
| Predicted Endpoint | Irritant                                     | Irritant                                                                         | Irritant                                                                         |
| Similarity         | 0.340                                        | 0.327                                                                            | 0.327                                                                            |
| Reference          | NTIS** AD-A042-527                           | In: Environ. and Human Safety of Major Surfactants; Talmage; S; 1994 Lewis Publi | In: Environ. and Human Safety of Major Surfactants; Talmage; S; 1994 Lewis Publi |

## Model Applicability

Missing features are fingerprint features in the query molecule not found in the training set.

1. Missing Feature: ECFP\_10 -1596132236 [\*]N[c]1:n:[\*]:[\*]:s:1
2. Missing Feature: ECFP\_10 -81134287 [\*]NC(=O)C([\*])[\*]
3. Missing Feature: ECFP\_10 -1426923364 [\*][c]1:[\*]:[\*]:c:s:1
4. Missing Feature: ECFP\_10 -224638920 [\*][c]1:[\*]:[\*]:s:c:1

## Feature Contribution

| Top features for Irritant |           |                  |       |                          |
|---------------------------|-----------|------------------|-------|--------------------------|
| Fingerprint               | Bit       | Structure/Smiles | Score | Irritant in training set |
| ECFP_10                   | 834876373 |                  | 0.203 | 28 out of 28             |

| ECFP_10                       | 2077607946  | 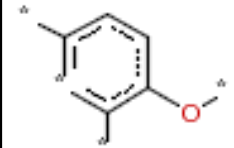   | 0.195  | 14 out of 14             |
|-------------------------------|-------------|---------------------------------------------------------------------------------------|--------|--------------------------|
| ECFP_10                       | 655739385   |    | 0.188  | 53 out of 54             |
| Top Features for Non-Irritant |             |                                                                                       |        |                          |
| Fingerprint                   | Bit         | Structure/Smiles                                                                      | Score  | Irritant in training set |
| ECFP_10                       | -1059365320 |    | -0.074 | 421 out of 560           |
| ECFP_10                       | 2099970318  |   | -0.072 | 297 out of 394           |
| ECFP_10                       | -1100000244 |  | -0.061 | 327 out of 429           |

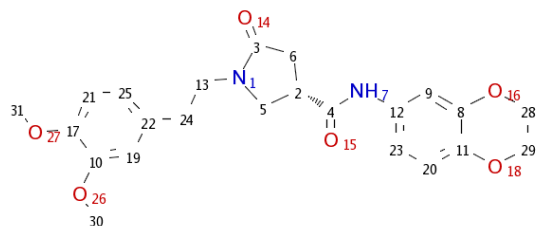

$C_{23}H_{26}N_2O_6$

Molecular Weight: 426.46234

ALogP: 1.967

Rotatable Bonds: 7

Acceptors: 6

Donors: 1

## Model Prediction

**Prediction: Irritant**

Probability: 1.000

Enrichment: 1.175

Bayesian Score: 2.220

Prediction: Positive if the Bayesian score is above the estimated best cutoff value.

Probability: The estimated probability that the sample is in the category.

Enrichment: An estimate of enrichment, that is, the increased likelihood (versus random) of this sample being in the category.

Bayesian Score: The standard Laplacian-modified Bayesian score.

## Structural Similar Compounds

| Name               | p-Acetophenetidine; 3'-(bis(2-hydroxyethyl)amino)-                    | P-ACETOPHENETIDIDE;3-NITRO- | ACETANILIDE; 3'-AMINO-4'-ETHOXY- |
|--------------------|-----------------------------------------------------------------------|-----------------------------|----------------------------------|
| Structure          |                                                                       |                             |                                  |
| Actual Endpoint    | Irritant                                                              | Irritant                    | Irritant                         |
| Predicted Endpoint | Irritant                                                              | Irritant                    | Irritant                         |
| Similarity         | 0.444                                                                 | 0.409                       | 0.395                            |
| Reference          | Prehled Prumyslove Toxikologie; Organicke Latky; Marhold; J. -;645;86 | 28ZPAK-;115;72              | 28ZPAK 115;72                    |

## Model Applicability

Missing features are fingerprint features in the query molecule not found in the training set.

- Missing Feature: ECFP\_10 -81134287 [\*]NC(=O)C([\*])[\*]

## Feature Contribution

| Top features for Irritant |            |                  |       |                          |
|---------------------------|------------|------------------|-------|--------------------------|
| Fingerprint               | Bit        | Structure/Smiles | Score | Irritant in training set |
| ECFP_10                   | 2077607946 |                  | 0.195 | 14 out of 14             |



| ECFP_10                       | 1680623188  | 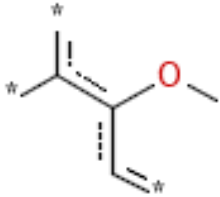   | 0.188  | 9 out of 9               |
|-------------------------------|-------------|---------------------------------------------------------------------------------------|--------|--------------------------|
| ECFP_10                       | -857146788  |    | 0.178  | 6 out of 6               |
| Top Features for Non-Irritant |             |                                                                                       |        |                          |
| Fingerprint                   | Bit         | Structure/Smiles                                                                      | Score  | Irritant in training set |
| ECFP_10                       | 561585423   |    | -0.593 | 0 out of 1               |
| ECFP_10                       | -1421422591 |  | -0.270 | 1 out of 2               |
| ECFP_10                       | -570915357  |  | -0.270 | 1 out of 2               |



$C_{24}H_{27}N_5O_4$

Molecular Weight: 449.50228

ALogP: 1.731

Rotatable Bonds: 9

Acceptors: 6

Donors: 1

## Model Prediction

**Prediction: Irritant**

Probability: 1.000

Enrichment: 1.176

Bayesian Score: 3.257

Prediction: Positive if the Bayesian score is above the estimated best cutoff value.

Probability: The estimated probability that the sample is in the category.

Enrichment: An estimate of enrichment, that is, the increased likelihood (versus random) of this sample being in the category.

Bayesian Score: The standard Laplacian-modified Bayesian score.

## Structural Similar Compounds

| Name               | p-Acetophenetidine; 3'-(bis(2-hydroxyethyl)amino)-                    | ISOQUINOLINE; 1;2;3;4-TETRAHYDRO-2-OCTANOYL- | O-ANISIDINE;ACETOACETYL |
|--------------------|-----------------------------------------------------------------------|----------------------------------------------|-------------------------|
| Structure          |                                                                       |                                              |                         |
| Actual Endpoint    | Irritant                                                              | Irritant                                     | Irritant                |
| Predicted Endpoint | Irritant                                                              | Irritant                                     | Irritant                |
| Similarity         | 0.316                                                                 | 0.315                                        | 0.315                   |
| Reference          | Prehled Prumyslove Toxikologie; Organicke Latky; Marhold; J. -;645;86 | NTIS** AD-A042-527                           | 28ZPAK-;116;72          |

## Model Applicability

Missing features are fingerprint features in the query molecule not found in the training set.

1. Missing Feature: ECFP\_10 -81134287 [\*]NC(=O)C([\*])[\*]
2. Missing Feature: ECFP\_10 -285549720 [\*]Cn1:c:[\*]:[\*]:n:1
3. Missing Feature: ECFP\_10 -676555381 [\*]n1:[\*]:[\*]:c:n:1
4. Missing Feature: ECFP\_10 -710237522 [\*]1:[\*]:n:c:n:1
5. Missing Feature: ECFP\_10 -708878603 [\*]n1:[\*]:[\*]:n:c:1
6. Missing Feature: ECFP\_10 772089587 [\*]:[c](:[\*])Cn(:[\*]):[\*]

## Feature Contribution

### Top features for Irritant

| Fingerprint | Bit | Structure/Smiles | Score | Irritant in training set |
|-------------|-----|------------------|-------|--------------------------|
|             |     |                  |       |                          |

| ECFP_10                       | 2077607946  | 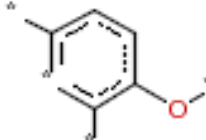   | 0.195  | 14 out of 14             |
|-------------------------------|-------------|---------------------------------------------------------------------------------------|--------|--------------------------|
| ECFP_10                       | 655739385   |    | 0.188  | 53 out of 54             |
| ECFP_10                       | 1680623188  |    | 0.188  | 9 out of 9               |
| Top Features for Non-Irritant |             |                                                                                       |        |                          |
| Fingerprint                   | Bit         | Structure/Smiles                                                                      | Score  | Irritant in training set |
| ECFP_10                       | -1059365320 |  | -0.074 | 421 out of 560           |
| ECFP_10                       | 2099970318  |  | -0.072 | 297 out of 394           |

ECFP\_10

-1100000244

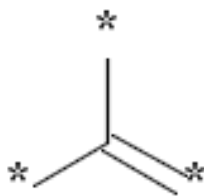

-0.061

327 out of 429

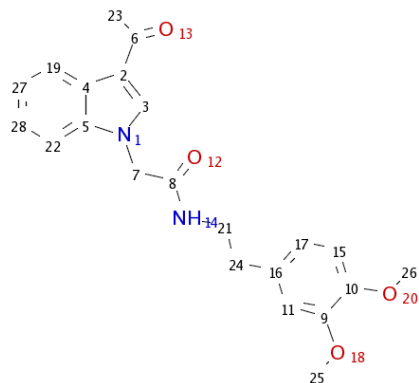

$C_{22}H_{24}N_2O_4$

Molecular Weight: 380.43696

ALogP: 3.001

Rotatable Bonds: 8

Acceptors: 4

Donors: 1

## Model Prediction

**Prediction: Irritant**

Probability: 0.999

Enrichment: 1.175

Bayesian Score: 1.059

Prediction: Positive if the Bayesian score is above the estimated best cutoff value.

Probability: The estimated probability that the sample is in the category.

Enrichment: An estimate of enrichment, that is, the increased likelihood (versus random) of this sample being in the category.

Bayesian Score: The standard Laplacian-modified Bayesian score.

## Structural Similar Compounds

| Name               | 7H-BENZIMIDAZO(2;1-a)BENZ(de)ISOQUINOLIN-7-ONE; 10-METHOXY- | CARBAMIC ACID; METHYL-; 1-(5;6;7;8-TETRAHYDRO)NAPHTHYL ESTER | ANTHRAQUINONE;1;5-DIMETHOXY |
|--------------------|-------------------------------------------------------------|--------------------------------------------------------------|-----------------------------|
| Structure          |                                                             |                                                              |                             |
| Actual Endpoint    | Irritant                                                    | Irritant                                                     | Irritant                    |
| Predicted Endpoint | Irritant                                                    | Irritant                                                     | Irritant                    |
| Similarity         | 0.333                                                       | 0.327                                                        | 0.311                       |
| Reference          | 28ZPAK 147;72                                               | 28ZPAK-;163;72                                               | 28ZPAK-;113;72              |

## Model Applicability

Missing features are fingerprint features in the query molecule not found in the training set.

- Missing Feature: ECFP\_10 -284945219 [\*]Cn1:c:[\*]:[\*]:[c]:1:[\*]
- Missing Feature: ECFP\_10 499043293 [\*]C(=[\*])Cn(:[\*]):[\*]

## Feature Contribution

| Top features for Irritant |            |                  |       |                          |
|---------------------------|------------|------------------|-------|--------------------------|
| Fingerprint               | Bit        | Structure/Smiles | Score | Irritant in training set |
| ECFP_10                   | 2077607946 |                  | 0.195 | 14 out of 14             |

| ECFP_10                       | 1680623188 | 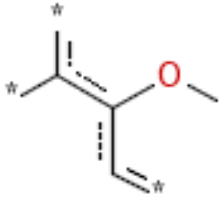   | 0.188  | 9 out of 9               |
|-------------------------------|------------|---------------------------------------------------------------------------------------|--------|--------------------------|
| ECFP_10                       | 1731843802 |    | 0.182  | 7 out of 7               |
| Top Features for Non-Irritant |            |                                                                                       |        |                          |
| Fingerprint                   | Bit        | Structure/Smiles                                                                      | Score  | Irritant in training set |
| ECFP_10                       | 129482634  |    | -0.346 | 2 out of 4               |
| ECFP_10                       | 1337040050 |   | -0.340 | 17 out of 30             |
| ECFP_10                       | 497523368  |  | -0.134 | 2 out of 3               |


 $C_{23}H_{26}N_4O_2$ 

Molecular Weight: 390.47814

ALogP: 2.702

Rotatable Bonds: 5

Acceptors: 2

Donors: 2

## Model Prediction

**Prediction: Irritant**

Probability: 1.000

Enrichment: 1.175

Bayesian Score: 2.326

Prediction: Positive if the Bayesian score is above the estimated best cutoff value.

Probability: The estimated probability that the sample is in the category.

Enrichment: An estimate of enrichment, that is, the increased likelihood (versus random) of this sample being in the category.

Bayesian Score: The standard Laplacian-modified Bayesian score.

## Structural Similar Compounds

| Name               | ISOQUINOLINE; 1;2;3;4-TETRAHYDRO-2-OCTANOYL- | ETHANOL; 2-(BENZYLOXY)- | 2-NAPHTHALENE SULFONIC ACID;5-AMINO- |
|--------------------|----------------------------------------------|-------------------------|--------------------------------------|
| Structure          |                                              |                         |                                      |
| Actual Endpoint    | Irritant                                     | Irritant                | Irritant                             |
| Predicted Endpoint | Irritant                                     | Irritant                | Irritant                             |
| Similarity         | 0.367                                        | 0.304                   | 0.286                                |
| Reference          | NTIS** AD-A042-527                           | AJOPAA 29;1363;46       | 28ZPAK-;187;72                       |

## Model Applicability

Missing features are fingerprint features in the query molecule not found in the training set.

- Missing Feature: ECFP\_10 979542842 [\*]C[c]1:n:[\*]:[\*]:[c]:1[\*]
- Missing Feature: ECFP\_10 1657836083 [\*]NC(=O)N([\*])[\*]

## Feature Contribution

| Top features for Irritant |           |                  |       |                          |
|---------------------------|-----------|------------------|-------|--------------------------|
| Fingerprint               | Bit       | Structure/Smiles | Score | Irritant in training set |
| ECFP_10                   | 865379614 |                  | 0.204 | 34 out of 34             |

| ECFP_10                       | -1102925512 | 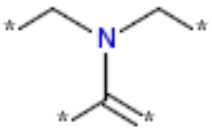   | 0.194  | 13 out of 13             |
|-------------------------------|-------------|---------------------------------------------------------------------------------------|--------|--------------------------|
| ECFP_10                       | -757679000  |    | 0.186  | 48 out of 49             |
| Top Features for Non-Irritant |             |                                                                                       |        |                          |
| Fingerprint                   | Bit         | Structure/Smiles                                                                      | Score  | Irritant in training set |
| ECFP_10                       | -1789102870 |    | -0.422 | 48 out of 91             |
| ECFP_10                       | 497523368   |  | -0.134 | 2 out of 3               |
| ECFP_10                       | 2099970318  |  | -0.072 | 297 out of 394           |





$C_{28}H_{34}N_5O_2$

Molecular Weight: 472.60186

ALogP: 1.567

Rotatable Bonds: 6

Acceptors: 2

Donors: 3

## Model Prediction

Prediction: Irritant

Probability: 0.999

Enrichment: 1.175

Bayesian Score: 0.971

Prediction: Positive if the Bayesian score is above the estimated best cutoff value.

Probability: The estimated probability that the sample is in the category.

Enrichment: An estimate of enrichment, that is, the increased likelihood (versus random) of this sample being in the category.

Bayesian Score: The standard Laplacian-modified Bayesian score.

## Structural Similar Compounds

| Name               | ISOQUINOLINE; 1;2;3;4-TETRAHYDRO-2-OCTANOYL- | CARBAMIC ACID; METHYL-; 1-(5;6;7;8-TETRAHYDRO)NAPHTHYL ESTER | ETHANOL; 2-(BENZYLOXY)- |
|--------------------|----------------------------------------------|--------------------------------------------------------------|-------------------------|
| Structure          |                                              |                                                              |                         |
| Actual Endpoint    | Irritant                                     | Irritant                                                     | Irritant                |
| Predicted Endpoint | Irritant                                     | Irritant                                                     | Irritant                |
| Similarity         | 0.283                                        | 0.246                                                        | 0.228                   |
| Reference          | NTIS** AD-A042-527                           | 28ZPAK-;163;72                                               | AJOPAA 29;1363;46       |

## Model Applicability

Missing features are fingerprint features in the query molecule not found in the training set.

1. Missing Feature: ECFP\_10 1976330679 [\*][NH+]([\*])[\*]
2. Missing Feature: ECFP\_10 979542842 [\*]C[c]1:n:[\*]:[\*]:[c]:1[\*]
3. Missing Feature: ECFP\_10 1657836083 [\*]NC(=O)N([\*])[\*]
4. Missing Feature: ECFP\_10 1133499173 [\*]C[NH+](C[\*])C[\*]
5. Missing Feature: ECFP\_10 -244159614 [\*]CC[NH+]([\*])[\*]
6. Missing Feature: ECFP\_10 474483418 [\*][NH+]([\*])CC=[\*]

## Feature Contribution

### Top features for Irritant

| Fingerprint | Bit | Structure/Smiles | Score | Irritant in training set |
|-------------|-----|------------------|-------|--------------------------|
|             |     |                  |       |                          |

| ECFP_10                       | -1102925512 | 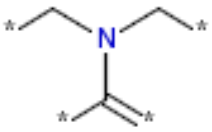   | 0.194  | 13 out of 13             |
|-------------------------------|-------------|---------------------------------------------------------------------------------------|--------|--------------------------|
| ECFP_10                       | -757679000  |    | 0.186  | 48 out of 49             |
| ECFP_10                       | 1341750291  |    | 0.178  | 6 out of 6               |
| Top Features for Non-Irritant |             |                                                                                       |        |                          |
| Fingerprint                   | Bit         | Structure/Smiles                                                                      | Score  | Irritant in training set |
| ECFP_10                       | 312779028   |   | -0.539 | 1 out of 3               |
| ECFP_10                       | -1789102870 |  | -0.422 | 48 out of 91             |

|         |           |                                                                                                           |        |              |
|---------|-----------|-----------------------------------------------------------------------------------------------------------|--------|--------------|
| ECFP_10 | -97048906 |  <chem>*C/C=C/C</chem> | -0.348 | 10 out of 18 |
|---------|-----------|-----------------------------------------------------------------------------------------------------------|--------|--------------|



$C_{25}H_{28}ClN_5O_2$

Molecular Weight: 465.97512

ALogP: 3.413

Rotatable Bonds: 4

Acceptors: 3

Donors: 2

## Model Prediction

**Prediction: Irritant**

Probability: 1.000

Enrichment: 1.176

Bayesian Score: 3.078

Prediction: Positive if the Bayesian score is above the estimated best cutoff value.

Probability: The estimated probability that the sample is in the category.

Enrichment: An estimate of enrichment, that is, the increased likelihood (versus random) of this sample being in the category.

Bayesian Score: The standard Laplacian-modified Bayesian score.

## Structural Similar Compounds

| Name               | ETHANOL;2-(P-CHLOROPHENOXY)- | ISOQUINOLINE; 1;2;3;4-TETRAHYDRO-2-OCTANOYL- | ETHANOL; 2;2'-(PHENYLIMINO)DI- |
|--------------------|------------------------------|----------------------------------------------|--------------------------------|
| Structure          |                              |                                              |                                |
| Actual Endpoint    | Irritant                     | Irritant                                     | Irritant                       |
| Predicted Endpoint | Irritant                     | Irritant                                     | Irritant                       |
| Similarity         | 0.268                        | 0.267                                        | 0.264                          |
| Reference          | 28ZPAK-;81;72                | NTIS** AD-A042-527                           | UCDS** 6/13/60                 |

## Model Applicability

Missing features are fingerprint features in the query molecule not found in the training set.

- Missing Feature: ECFP\_10 979542842 [\*]C[c]1:n:[\*]:[\*]:[c]:1[\*]
- Missing Feature: ECFP\_10 1657836083 [\*]NC(=O)N([\*])[\*]

## Feature Contribution

| Top features for Irritant |             |                  |       |                          |
|---------------------------|-------------|------------------|-------|--------------------------|
| Fingerprint               | Bit         | Structure/Smiles | Score | Irritant in training set |
| ECFP_10                   | -1102925512 |                  | 0.194 | 13 out of 13             |

| ECFP_10                       | -175021654  | 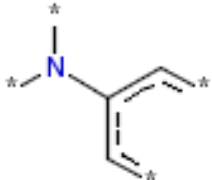   | 0.190  | 10 out of 10             |
|-------------------------------|-------------|---------------------------------------------------------------------------------------|--------|--------------------------|
| ECFP_10                       | -757679000  |    | 0.186  | 48 out of 49             |
| Top Features for Non-Irritant |             |                                                                                       |        |                          |
| Fingerprint                   | Bit         | Structure/Smiles                                                                      | Score  | Irritant in training set |
| ECFP_10                       | -1789102870 |    | -0.422 | 48 out of 91             |
| ECFP_10                       | 497523368   |  | -0.134 | 2 out of 3               |
| ECFP_10                       | 2099970318  |  | -0.072 | 297 out of 394           |

## MOST ACTIVE.mol

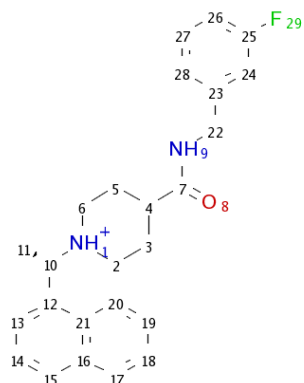

$C_{25}H_{28}FN_2O$

Molecular Weight: 391.50102

ALogP: 3.098

Rotatable Bonds: 5

Acceptors: 1

Donors: 2

## Model Prediction

**Prediction: Irritant**

Probability: 1.000

Enrichment: 1.175

Bayesian Score: 2.233

Prediction: Positive if the Bayesian score is above the estimated best cutoff value.

Probability: The estimated probability that the sample is in the category.

Enrichment: An estimate of enrichment, that is, the increased likelihood (versus random) of this sample being in the category.

Bayesian Score: The standard Laplacian-modified Bayesian score.

## TOPKAT\_Ocular\_Irritancy\_None\_vs\_Irritant

### Structural Similar Compounds

| Name               | 7H-Benz(de)anthracen-7-one; 3;9-dibromo-                               | Indole-2;3-dione; 5-bromo-                                            | SULFOXIDE; p-CHLOROPHENYL METHYL |
|--------------------|------------------------------------------------------------------------|-----------------------------------------------------------------------|----------------------------------|
| Structure          |                                                                        |                                                                       |                                  |
| Actual Endpoint    | Irritant                                                               | Irritant                                                              | Irritant                         |
| Predicted Endpoint | Irritant                                                               | Irritant                                                              | Irritant                         |
| Similarity         | 0.320                                                                  | 0.319                                                                 | 0.310                            |
| Reference          | Prehled Prumyslove Toxikologie; Organicke Latky; Marhold; J. pp 567;86 | Prehled Prumyslove Toxikologie; Organicke Latky; Marhold; J. -;821;86 | NTIS** AD-A082-824               |

### Model Applicability

Missing features are fingerprint features in the query molecule not found in the training set.

1. Missing Feature: ECFP\_10 1976330679 [\*][NH+]([\*])[\*]
2. Missing Feature: ECFP\_10 2070272975 [\*]C[NH+](C[\*])C([\*])[\*]
3. Missing Feature: ECFP\_10 -244159614 [\*]CC[NH+]([\*])[\*]
4. Missing Feature: ECFP\_10 -81134287 [\*]NC(=O)C([\*])[\*]
5. Missing Feature: ECFP\_10 -1670638661 [\*][NH+]([\*])[C@H](C)[c]([\*]):[\*]
6. Missing Feature: ECFP\_10 769925792 [\*]NC[c]([\*]):[\*]

### Feature Contribution

#### Top features for Irritant

| Fingerprint | Bit | Structure/Smiles | Score | Irritant in training set |
|-------------|-----|------------------|-------|--------------------------|
|             |     |                  |       |                          |

| ECFP_10                       | -1046436026 |    | 0.197  | 16 out of 16             |
|-------------------------------|-------------|---------------------------------------------------------------------------------------|--------|--------------------------|
| ECFP_10                       | -857146788  |    | 0.178  | 6 out of 6               |
| ECFP_10                       | 1335340087  |    | 0.165  | 4 out of 4               |
| Top Features for Non-Irritant |             |                                                                                       |        |                          |
| Fingerprint                   | Bit         | Structure/Smiles                                                                      | Score  | Irritant in training set |
| ECFP_10                       | 497523368   |  | -0.134 | 2 out of 3               |
| ECFP_10                       | 2099970318  |  | -0.072 | 297 out of 394           |
|                               |             |                                                                                       |        |                          |

ECFP\_10

-1100000244



-0.061

327 out of 429



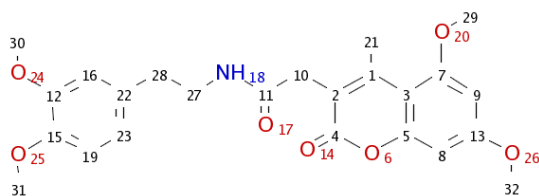

$C_{24}H_{27}NO_7$

Molecular Weight: 441.47368

ALogP: 3.388

Rotatable Bonds: 9

Acceptors: 7

Donors: 1

## Model Prediction

Prediction: Non-Carcinogen

Probability: 0.228

Enrichment: 0.707

Bayesian Score: -3.146

Prediction: Positive if the Bayesian score is above the estimated best cutoff value.

Probability: The estimated probability that the sample is in the category.

Enrichment: An estimate of enrichment, that is, the increased likelihood (versus random) of this sample being in the category.

Bayesian Score: The standard Laplacian-modified Bayesian score.

## Structural Similar Compounds

| Name               | Mesuprine                                                           | Nabumetone                                                          | Atenolol                                                            |
|--------------------|---------------------------------------------------------------------|---------------------------------------------------------------------|---------------------------------------------------------------------|
| Structure          |                                                                     |                                                                     |                                                                     |
| Actual Endpoint    | Carcinogen                                                          | Non-Carcinogen                                                      | Carcinogen                                                          |
| Predicted Endpoint | Carcinogen                                                          | Non-Carcinogen                                                      | Non-Carcinogen                                                      |
| Similarity         | 0.415                                                               | 0.395                                                               | 0.383                                                               |
| Reference          | US FDA (Centre for Drug Eval.& Res./Off. Testing & Res.) Sept. 1997 | US FDA (Centre for Drug Eval.& Res./Off. Testing & Res.) Sept. 1997 | US FDA (Centre for Drug Eval.& Res./Off. Testing & Res.) Sept. 1997 |

## Model Applicability

Missing features are fingerprint features in the query molecule not found in the training set.

1. All descriptors are in range.

## Feature Contribution

### Top features for Carcinogen

| Fingerprint | Bit         | Structure/Smiles | Score | Carcinogen in training set |
|-------------|-------------|------------------|-------|----------------------------|
| FCFP_10     | -1678275541 |                  | 0.799 | 4 out of 4                 |

| FCFP_10                         | 1985089045  | 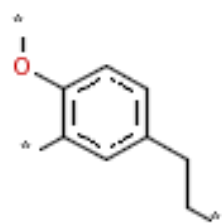    | 0.454  | 5 out of 9                 |
|---------------------------------|-------------|---------------------------------------------------------------------------------------|--------|----------------------------|
| FCFP_10                         | -922480536  |    | 0.422  | 1 out of 1                 |
| Top Features for Non-Carcinogen |             |                                                                                       |        |                            |
| Fingerprint                     | Bit         | Structure/Smiles                                                                      | Score  | Carcinogen in training set |
| FCFP_10                         | -1038421835 |    | -0.810 | 0 out of 4                 |
| FCFP_10                         | -1099193755 |  | -0.503 | 3 out of 18                |
| FCFP_10                         | -1405834164 |  | -0.485 | 0 out of 2                 |


 $C_{25}H_{29}N_3O_4$ 

Molecular Weight: 435.51546

ALogP: 2.831

Rotatable Bonds: 8

Acceptors: 4

Donors: 2

## Model Prediction

**Prediction: Carcinogen**

Probability: 0.265

Enrichment: 0.823

Bayesian Score: -0.369

Prediction: Positive if the Bayesian score is above the estimated best cutoff value.

Probability: The estimated probability that the sample is in the category.

Enrichment: An estimate of enrichment, that is, the increased likelihood (versus random) of this sample being in the category.

Bayesian Score: The standard Laplacian-modified Bayesian score.

## Structural Similar Compounds

| Name               | Deserpidine                                                         | Reserpine                                                           | Pergolide                                                           |
|--------------------|---------------------------------------------------------------------|---------------------------------------------------------------------|---------------------------------------------------------------------|
| Structure          |                                                                     |                                                                     |                                                                     |
| Actual Endpoint    | Carcinogen                                                          | Carcinogen                                                          | Carcinogen                                                          |
| Predicted Endpoint | Carcinogen                                                          | Carcinogen                                                          | Carcinogen                                                          |
| Similarity         | 0.377                                                               | 0.352                                                               | 0.303                                                               |
| Reference          | US FDA (Centre for Drug Eval.& Res./Off. Testing & Res.) Sept. 1997 | US FDA (Centre for Drug Eval.& Res./Off. Testing & Res.) Sept. 1997 | US FDA (Centre for Drug Eval.& Res./Off. Testing & Res.) Sept. 1997 |

## Model Applicability

Missing features are fingerprint features in the query molecule not found in the training set.

1. All descriptors are in range.

## Feature Contribution

### Top features for Carcinogen

| Fingerprint | Bit        | Structure/Smiles | Score | Carcinogen in training set |
|-------------|------------|------------------|-------|----------------------------|
| FCFP_10     | 2005402822 |                  | 0.461 | 9 out of 17                |

| FCFP_10                         | 1985089045 | 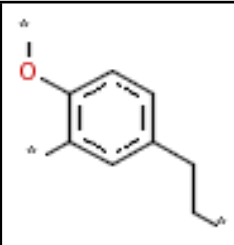    | 0.454  | 5 out of 9                 |
|---------------------------------|------------|---------------------------------------------------------------------------------------|--------|----------------------------|
| FCFP_10                         | 1673997923 |    | 0.451  | 4 out of 7                 |
| Top Features for Non-Carcinogen |            |                                                                                       |        |                            |
| Fingerprint                     | Bit        | Structure/Smiles                                                                      | Score  | Carcinogen in training set |
| FCFP_10                         | 1038421835 |    | -0.810 | 0 out of 4                 |
| FCFP_10                         | 907036844  |   | -0.503 | 3 out of 18                |
| FCFP_10                         | 206055935  |  | -0.485 | 0 out of 2                 |



$C_{29}H_{24}FNO_5$

Molecular Weight: 485.50296

ALogP: 5.695

Rotatable Bonds: 7

Acceptors: 4

Donors: 2

## Model Prediction

Prediction: Non-Carcinogen

Probability: 0.204

Enrichment: 0.635

Bayesian Score: -7.475

Prediction: Positive if the Bayesian score is above the estimated best cutoff value.

Probability: The estimated probability that the sample is in the category.

Enrichment: An estimate of enrichment, that is, the increased likelihood (versus random) of this sample being in the category.

Bayesian Score: The standard Laplacian-modified Bayesian score.

## Structural Similar Compounds

| Name               | Glyburide                                                           | Fluvastatin                                                         | Glimepiride                                                         |
|--------------------|---------------------------------------------------------------------|---------------------------------------------------------------------|---------------------------------------------------------------------|
| Structure          |                                                                     |                                                                     |                                                                     |
| Actual Endpoint    | Non-Carcinogen                                                      | Non-Carcinogen                                                      | Non-Carcinogen                                                      |
| Predicted Endpoint | Non-Carcinogen                                                      | Non-Carcinogen                                                      | Non-Carcinogen                                                      |
| Similarity         | 0.357                                                               | 0.324                                                               | 0.319                                                               |
| Reference          | US FDA (Centre for Drug Eval.& Res./Off. Testing & Res.) Sept. 1997 | US FDA (Centre for Drug Eval.& Res./Off. Testing & Res.) Sept. 1997 | US FDA (Centre for Drug Eval.& Res./Off. Testing & Res.) Sept. 1997 |

## Model Applicability

Missing features are fingerprint features in the query molecule not found in the training set.

1. All descriptors are in range.

## Feature Contribution

### Top features for Carcinogen

| Fingerprint | Bit         | Structure/Smiles | Score | Carcinogen in training set |
|-------------|-------------|------------------|-------|----------------------------|
| FCFP_10     | -1678275541 |                  | 0.799 | 4 out of 4                 |

| FCFP_10                         | -1066794953 | 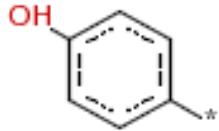   | 0.737  | 5 out of 6                 |
|---------------------------------|-------------|---------------------------------------------------------------------------------------|--------|----------------------------|
| FCFP_10                         | -922480536  |    | 0.422  | 1 out of 1                 |
| Top Features for Non-Carcinogen |             |                                                                                       |        |                            |
| Fingerprint                     | Bit         | Structure/Smiles                                                                      | Score  | Carcinogen in training set |
| FCFP_10                         | 1985639687  |    | -0.810 | 0 out of 4                 |
| FCFP_10                         | -1508180856 |  | -0.791 | 2 out of 18                |
| FCFP_10                         | 551850122   |  | -0.679 | 9 out of 60                |



$C_{22}H_{22}N_4O_3$

Molecular Weight: 390.43508

ALogP: 1.807

Rotatable Bonds: 6

Acceptors: 3

Donors: 4

## Model Prediction

**Prediction: Carcinogen**

Probability: 0.277

Enrichment: 0.860

Bayesian Score: 0.282

Prediction: Positive if the Bayesian score is above the estimated best cutoff value.

Probability: The estimated probability that the sample is in the category.

Enrichment: An estimate of enrichment, that is, the increased likelihood (versus random) of this sample being in the category.

Bayesian Score: The standard Laplacian-modified Bayesian score.

## Structural Similar Compounds

| Name               | Tryptophan                                                          | Prilocaine                                                          | Sumatriptan                                                         |
|--------------------|---------------------------------------------------------------------|---------------------------------------------------------------------|---------------------------------------------------------------------|
| Structure          |                                                                     |                                                                     |                                                                     |
| Actual Endpoint    | Non-Carcinogen                                                      | Carcinogen                                                          | Non-Carcinogen                                                      |
| Predicted Endpoint | Non-Carcinogen                                                      | Carcinogen                                                          | Non-Carcinogen                                                      |
| Similarity         | 0.440                                                               | 0.400                                                               | 0.375                                                               |
| Reference          | US FDA (Centre for Drug Eval.& Res./Off. Testing & Res.) Sept. 1997 | US FDA (Centre for Drug Eval.& Res./Off. Testing & Res.) Sept. 1997 | US FDA (Centre for Drug Eval.& Res./Off. Testing & Res.) Sept. 1997 |

## Model Applicability

Missing features are fingerprint features in the query molecule not found in the training set.

1. All descriptors are in range.

## Feature Contribution

### Top features for Carcinogen

| Fingerprint | Bit        | Structure/Smiles | Score | Carcinogen in training set |
|-------------|------------|------------------|-------|----------------------------|
| FCFP_10     | 2005402822 |                  | 0.461 | 9 out of 17                |







$C_{19}H_{23}N_3O_4S$

Molecular Weight: 389.46862

ALogP: 1.461

Rotatable Bonds: 7

Acceptors: 5

Donors: 1

## Model Prediction

Prediction: Carcinogen

Probability: 0.251

Enrichment: 0.778

Bayesian Score: -1.273

Prediction: Positive if the Bayesian score is above the estimated best cutoff value.

Probability: The estimated probability that the sample is in the category.

Enrichment: An estimate of enrichment, that is, the increased likelihood (versus random) of this sample being in the category.

Bayesian Score: The standard Laplacian-modified Bayesian score.

## Structural Similar Compounds

| Name               | Praziquantel                                                        | Sulfamethazine                                                      | Furothiazole                                                        |
|--------------------|---------------------------------------------------------------------|---------------------------------------------------------------------|---------------------------------------------------------------------|
| Structure          |                                                                     |                                                                     |                                                                     |
| Actual Endpoint    | Non-Carcinogen                                                      | Carcinogen                                                          | Carcinogen                                                          |
| Predicted Endpoint | Non-Carcinogen                                                      | Carcinogen                                                          | Carcinogen                                                          |
| Similarity         | 0.315                                                               | 0.314                                                               | 0.302                                                               |
| Reference          | US FDA (Centre for Drug Eval.& Res./Off. Testing & Res.) Sept. 1997 | US FDA (Centre for Drug Eval.& Res./Off. Testing & Res.) Sept. 1997 | US FDA (Centre for Drug Eval.& Res./Off. Testing & Res.) Sept. 1997 |

## Model Applicability

Missing features are fingerprint features in the query molecule not found in the training set.

1. All descriptors are in range.

## Feature Contribution

### Top features for Carcinogen

| Fingerprint | Bit         | Structure/Smiles | Score | Carcinogen in training set |
|-------------|-------------|------------------|-------|----------------------------|
| FCFP_10     | -1776076225 |                  | 0.576 | 3 out of 4                 |

| FCFP_10                         | 1985089045  | 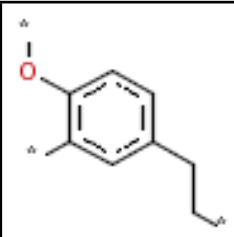           | 0.454  | 5 out of 9                 |
|---------------------------------|-------------|----------------------------------------------------------------------------------------------|--------|----------------------------|
| FCFP_10                         | -1773715875 |           | 0.438  | 2 out of 3                 |
| Top Features for Non-Carcinogen |             |                                                                                              |        |                            |
| Fingerprint                     | Bit         | Structure/Smiles                                                                             | Score  | Carcinogen in training set |
| FCFP_10                         | -2005207466 |           | -0.810 | 0 out of 4                 |
| FCFP_10                         | -1038421835 |          | -0.810 | 0 out of 4                 |
| FCFP_10                         | 1743817318  |  Chiral | -0.810 | 0 out of 4                 |



$C_{23}H_{26}N_2O_6$

Molecular Weight: 426.46234

ALogP: 1.967

Rotatable Bonds: 7

Acceptors: 6

Donors: 1

## Model Prediction

Prediction: Non-Carcinogen

Probability: 0.227

Enrichment: 0.706

Bayesian Score: -3.165

Prediction: Positive if the Bayesian score is above the estimated best cutoff value.

Probability: The estimated probability that the sample is in the category.

Enrichment: An estimate of enrichment, that is, the increased likelihood (versus random) of this sample being in the category.

Bayesian Score: The standard Laplacian-modified Bayesian score.

## Structural Similar Compounds

| Name               | Phenacetin                                                          | Nitroacetophenetide                                                 | Carteolol                                                           |
|--------------------|---------------------------------------------------------------------|---------------------------------------------------------------------|---------------------------------------------------------------------|
| Structure          |                                                                     |                                                                     |                                                                     |
| Actual Endpoint    | Carcinogen                                                          | Non-Carcinogen                                                      | Non-Carcinogen                                                      |
| Predicted Endpoint | Carcinogen                                                          | Carcinogen                                                          | Non-Carcinogen                                                      |
| Similarity         | 0.425                                                               | 0.409                                                               | 0.358                                                               |
| Reference          | US FDA (Centre for Drug Eval.& Res./Off. Testing & Res.) Sept. 1997 | US FDA (Centre for Drug Eval.& Res./Off. Testing & Res.) Sept. 1997 | US FDA (Centre for Drug Eval.& Res./Off. Testing & Res.) Sept. 1997 |

## Model Applicability

Missing features are fingerprint features in the query molecule not found in the training set.

1. All descriptors are in range.

## Feature Contribution

### Top features for Carcinogen

| Fingerprint | Bit         | Structure/Smiles | Score | Carcinogen in training set |
|-------------|-------------|------------------|-------|----------------------------|
| FCFP_10     | -1838187238 |                  | 0.454 | 5 out of 9                 |

| FCFP_10                         | 1985089045  | 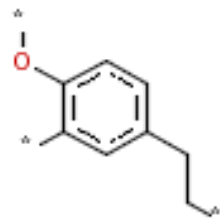          | 0.454  | 5 out of 9                 |
|---------------------------------|-------------|---------------------------------------------------------------------------------------------|--------|----------------------------|
| FCFP_10                         | 1908043702  |          | 0.422  | 1 out of 1                 |
| Top Features for Non-Carcinogen |             |                                                                                             |        |                            |
| Fingerprint                     | Bit         | Structure/Smiles                                                                            | Score  | Carcinogen in training set |
| FCFP_10                         | -1038421835 |          | -0.810 | 0 out of 4                 |
| FCFP_10                         | 1743817318  |  Chiral | -0.810 | 0 out of 4                 |
| FCFP_10                         | -2005207466 |        | -0.810 | 0 out of 4                 |

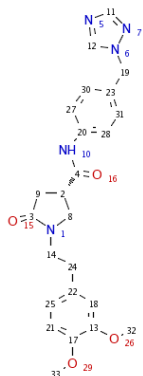

$C_{24}H_{27}N_5O_4$

Molecular Weight: 449.50228

ALogP: 1.731

Rotatable Bonds: 9

Acceptors: 6

Donors: 1

## Model Prediction

Prediction: Non-Carcinogen

Probability: 0.234

Enrichment: 0.727

Bayesian Score: -2.554

Prediction: Positive if the Bayesian score is above the estimated best cutoff value.

Probability: The estimated probability that the sample is in the category.

Enrichment: An estimate of enrichment, that is, the increased likelihood (versus random) of this sample being in the category.

Bayesian Score: The standard Laplacian-modified Bayesian score.

## Structural Similar Compounds

| Name               | Phenacetin                                                          | Nitroacetophenetide                                                 | Praziquantel                                                        |
|--------------------|---------------------------------------------------------------------|---------------------------------------------------------------------|---------------------------------------------------------------------|
| Structure          |                                                                     |                                                                     |                                                                     |
| Actual Endpoint    | Carcinogen                                                          | Non-Carcinogen                                                      | Non-Carcinogen                                                      |
| Predicted Endpoint | Carcinogen                                                          | Carcinogen                                                          | Non-Carcinogen                                                      |
| Similarity         | 0.314                                                               | 0.309                                                               | 0.293                                                               |
| Reference          | US FDA (Centre for Drug Eval.& Res./Off. Testing & Res.) Sept. 1997 | US FDA (Centre for Drug Eval.& Res./Off. Testing & Res.) Sept. 1997 | US FDA (Centre for Drug Eval.& Res./Off. Testing & Res.) Sept. 1997 |

## Model Applicability

Missing features are fingerprint features in the query molecule not found in the training set.

1. All descriptors are in range.

## Feature Contribution

### Top features for Carcinogen

| Fingerprint | Bit        | Structure/Smiles | Score | Carcinogen in training set |
|-------------|------------|------------------|-------|----------------------------|
| FCFP_10     | -451043714 |                  | 0.614 | 2 out of 2                 |

| FCFP_10                         | 1985089045  | 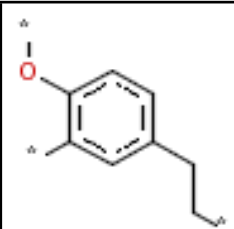         | 0.454  | 5 out of 9                 |
|---------------------------------|-------------|--------------------------------------------------------------------------------------------|--------|----------------------------|
| FCFP_10                         | -1838187238 |         | 0.454  | 5 out of 9                 |
| Top Features for Non-Carcinogen |             |                                                                                            |        |                            |
| Fingerprint                     | Bit         | Structure/Smiles                                                                           | Score  | Carcinogen in training set |
| FCFP_10                         | 1743817318  |  Chiral | -0.810 | 0 out of 4                 |
| FCFP_10                         | -1038421835 |        | -0.810 | 0 out of 4                 |
| FCFP_10                         | -2005207466 |       | -0.810 | 0 out of 4                 |

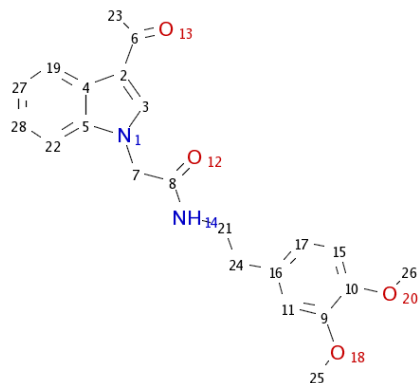

$C_{22}H_{24}N_2O_4$

Molecular Weight: 380.43696

ALogP: 3.001

Rotatable Bonds: 8

Acceptors: 4

Donors: 1

## Model Prediction

Prediction: Non-Carcinogen

Probability: 0.205

Enrichment: 0.636

Bayesian Score: -7.178

Prediction: Positive if the Bayesian score is above the estimated best cutoff value.

Probability: The estimated probability that the sample is in the category.

Enrichment: An estimate of enrichment, that is, the increased likelihood (versus random) of this sample being in the category.

Bayesian Score: The standard Laplacian-modified Bayesian score.

## Structural Similar Compounds

| Name               | Propafenone                                                         | Glyburide                                                           | Ondansetron                                                         |
|--------------------|---------------------------------------------------------------------|---------------------------------------------------------------------|---------------------------------------------------------------------|
| Structure          |                                                                     |                                                                     |                                                                     |
| Actual Endpoint    | Non-Carcinogen                                                      | Non-Carcinogen                                                      | Non-Carcinogen                                                      |
| Predicted Endpoint | Non-Carcinogen                                                      | Non-Carcinogen                                                      | Non-Carcinogen                                                      |
| Similarity         | 0.345                                                               | 0.344                                                               | 0.333                                                               |
| Reference          | US FDA (Centre for Drug Eval.& Res./Off. Testing & Res.) Sept. 1997 | US FDA (Centre for Drug Eval.& Res./Off. Testing & Res.) Sept. 1997 | US FDA (Centre for Drug Eval.& Res./Off. Testing & Res.) Sept. 1997 |

## Model Applicability

Missing features are fingerprint features in the query molecule not found in the training set.

1. All descriptors are in range.

## Feature Contribution

### Top features for Carcinogen

| Fingerprint | Bit        | Structure/Smiles | Score | Carcinogen in training set |
|-------------|------------|------------------|-------|----------------------------|
| FCFP_10     | 1985089045 |                  | 0.454 | 5 out of 9                 |

| FCFP_10                         | -387072142  | 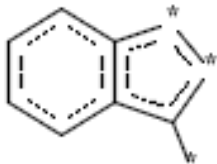   | 0.376  | 5 out of 10                |
|---------------------------------|-------------|---------------------------------------------------------------------------------------|--------|----------------------------|
| FCFP_10                         | 566058135   |    | 0.209  | 16 out of 41               |
| Top Features for Non-Carcinogen |             |                                                                                       |        |                            |
| Fingerprint                     | Bit         | Structure/Smiles                                                                      | Score  | Carcinogen in training set |
| FCFP_10                         | -1038421835 |    | -0.810 | 0 out of 4                 |
| FCFP_10                         | 956098679   |   | -0.810 | 0 out of 4                 |
| FCFP_10                         | -898059030  |  | -0.661 | 0 out of 3                 |





$C_{23}H_{26}N_4O_2$

Molecular Weight: 390.47814

ALogP: 2.702

Rotatable Bonds: 5

Acceptors: 2

Donors: 2

## Model Prediction

Prediction: Carcinogen

Probability: 0.338

Enrichment: 1.049

Bayesian Score: 2.853

Prediction: Positive if the Bayesian score is above the estimated best cutoff value.

Probability: The estimated probability that the sample is in the category.

Enrichment: An estimate of enrichment, that is, the increased likelihood (versus random) of this sample being in the category.

Bayesian Score: The standard Laplacian-modified Bayesian score.

## Structural Similar Compounds

| Name               | Etodolac                                                            | Tryptophan                                                          | Deserpidine                                                         |
|--------------------|---------------------------------------------------------------------|---------------------------------------------------------------------|---------------------------------------------------------------------|
| Structure          |                                                                     |                                                                     |                                                                     |
| Actual Endpoint    | Non-Carcinogen                                                      | Non-Carcinogen                                                      | Carcinogen                                                          |
| Predicted Endpoint | Non-Carcinogen                                                      | Non-Carcinogen                                                      | Carcinogen                                                          |
| Similarity         | 0.368                                                               | 0.340                                                               | 0.304                                                               |
| Reference          | US FDA (Centre for Drug Eval.& Res./Off. Testing & Res.) Sept. 1997 | US FDA (Centre for Drug Eval.& Res./Off. Testing & Res.) Sept. 1997 | US FDA (Centre for Drug Eval.& Res./Off. Testing & Res.) Sept. 1997 |

## Model Applicability

Missing features are fingerprint features in the query molecule not found in the training set.

1. All descriptors are in range.

## Feature Contribution

### Top features for Carcinogen

| Fingerprint | Bit         | Structure/Smiles | Score | Carcinogen in training set |
|-------------|-------------|------------------|-------|----------------------------|
| FCFP_10     | -2051315385 |                  | 0.614 | 2 out of 2                 |

| FCFP_10                         | -1986098826 | 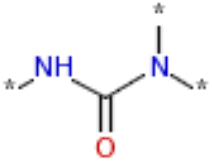   | 0.576  | 8 out of 13                |
|---------------------------------|-------------|---------------------------------------------------------------------------------------|--------|----------------------------|
| FCFP_10                         | 2005402822  |    | 0.461  | 9 out of 17                |
| Top Features for Non-Carcinogen |             |                                                                                       |        |                            |
| Fingerprint                     | Bit         | Structure/Smiles                                                                      | Score  | Carcinogen in training set |
| FCFP_10                         | -2005207466 |    | -0.810 | 0 out of 4                 |
| FCFP_10                         | -2093839777 |  | -0.558 | 11 out of 64               |
| FCFP_10                         | 907036844   |  | -0.503 | 3 out of 18                |



$C_{28}H_{34}N_5O_2$

Molecular Weight: 472.60186

ALogP: 1.567

Rotatable Bonds: 6

Acceptors: 2

Donors: 3

## Model Prediction

**Prediction: Carcinogen**

Probability: 0.290

Enrichment: 0.899

Bayesian Score: 0.897

Prediction: Positive if the Bayesian score is above the estimated best cutoff value.

Probability: The estimated probability that the sample is in the category.

Enrichment: An estimate of enrichment, that is, the increased likelihood (versus random) of this sample being in the category.

Bayesian Score: The standard Laplacian-modified Bayesian score.

## Structural Similar Compounds

| Name               | Etodolac                                                            | Tryptophan                                                          | Bromocriptine                                                       |
|--------------------|---------------------------------------------------------------------|---------------------------------------------------------------------|---------------------------------------------------------------------|
| Structure          |                                                                     |                                                                     |                                                                     |
| Actual Endpoint    | Non-Carcinogen                                                      | Non-Carcinogen                                                      | Carcinogen                                                          |
| Predicted Endpoint | Non-Carcinogen                                                      | Non-Carcinogen                                                      | Carcinogen                                                          |
| Similarity         | 0.333                                                               | 0.286                                                               | 0.272                                                               |
| Reference          | US FDA (Centre for Drug Eval.& Res./Off. Testing & Res.) Sept. 1997 | US FDA (Centre for Drug Eval.& Res./Off. Testing & Res.) Sept. 1997 | US FDA (Centre for Drug Eval.& Res./Off. Testing & Res.) Sept. 1997 |

## Model Applicability

Missing features are fingerprint features in the query molecule not found in the training set.

1. Missing Feature: FCFP\_10 10 [\*][NH+]([\*])([\*])
2. Missing Feature: FCFP\_10 -1853714334 [\*]C[NH+](C[\*])C[\*]
3. Missing Feature: FCFP\_10 1155241219 [\*]CC[NH+]([\*])([\*])

## Feature Contribution

| Top features for Carcinogen |             |                  |       |                            |
|-----------------------------|-------------|------------------|-------|----------------------------|
| Fingerprint                 | Bit         | Structure/Smiles | Score | Carcinogen in training set |
| FCFP_10                     | -2051315385 |                  | 0.614 | 2 out of 2                 |

| FCFP_10                         | -1986098826 | 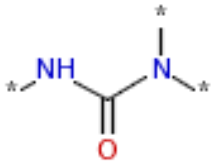        | 0.576  | 8 out of 13                |
|---------------------------------|-------------|--------------------------------------------------------------------------------------------|--------|----------------------------|
| FCFP_10                         | 2005402822  |         | 0.461  | 9 out of 17                |
| Top Features for Non-Carcinogen |             |                                                                                            |        |                            |
| Fingerprint                     | Bit         | Structure/Smiles                                                                           | Score  | Carcinogen in training set |
| FCFP_10                         | 1743817318  |  Chiral | -0.810 | 0 out of 4                 |
| FCFP_10                         | -2005207466 |       | -0.810 | 0 out of 4                 |
| FCFP_10                         | -2093839777 |       | -0.558 | 11 out of 64               |



$C_{25}H_{28}ClN_5O_2$

Molecular Weight: 465.97512

ALogP: 3.413

Rotatable Bonds: 4

Acceptors: 3

Donors: 2

## Model Prediction

Prediction: Non-Carcinogen

Probability: 0.238

Enrichment: 0.738

Bayesian Score: -2.246

Prediction: Positive if the Bayesian score is above the estimated best cutoff value.

Probability: The estimated probability that the sample is in the category.

Enrichment: An estimate of enrichment, that is, the increased likelihood (versus random) of this sample being in the category.

Bayesian Score: The standard Laplacian-modified Bayesian score.

## Structural Similar Compounds

| Name               | Temazepam                                                           | Doxefazepam                                                         | Amoxapine                                                           |
|--------------------|---------------------------------------------------------------------|---------------------------------------------------------------------|---------------------------------------------------------------------|
| Structure          |                                                                     |                                                                     |                                                                     |
| Actual Endpoint    | Non-Carcinogen                                                      | Carcinogen                                                          | Carcinogen                                                          |
| Predicted Endpoint | Non-Carcinogen                                                      | Non-Carcinogen                                                      | Carcinogen                                                          |
| Similarity         | 0.339                                                               | 0.338                                                               | 0.333                                                               |
| Reference          | US FDA (Centre for Drug Eval.& Res./Off. Testing & Res.) Sept. 1997 | US FDA (Centre for Drug Eval.& Res./Off. Testing & Res.) Sept. 1997 | US FDA (Centre for Drug Eval.& Res./Off. Testing & Res.) Sept. 1997 |

## Model Applicability

Missing features are fingerprint features in the query molecule not found in the training set.

1. All descriptors are in range.

## Feature Contribution

| Top features for Carcinogen |             |                  |       |                            |
|-----------------------------|-------------|------------------|-------|----------------------------|
| Fingerprint                 | Bit         | Structure/Smiles | Score | Carcinogen in training set |
| FCFP_10                     | -2051315385 |                  | 0.614 | 2 out of 2                 |

| FCFP_10                         | -1986098826 | 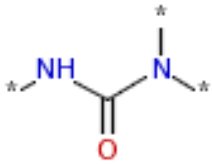          | 0.576  | 8 out of 13                |
|---------------------------------|-------------|----------------------------------------------------------------------------------------------|--------|----------------------------|
| FCFP_10                         | 2005402822  |           | 0.461  | 9 out of 17                |
| Top Features for Non-Carcinogen |             |                                                                                              |        |                            |
| Fingerprint                     | Bit         | Structure/Smiles                                                                             | Score  | Carcinogen in training set |
| FCFP_10                         | 1546024460  |           | -1.055 | 0 out of 6                 |
| FCFP_10                         | -2005207466 |         | -0.810 | 0 out of 4                 |
| FCFP_10                         | 1743817318  |  Chiral | -0.810 | 0 out of 4                 |

## MOST ACTIVE.mol



C<sub>25</sub>H<sub>28</sub>FN<sub>2</sub>O

Molecular Weight: 391.50102

ALogP: 3.098

Rotatable Bonds: 5

Acceptors: 1

Donors: 2

### Model Prediction

Prediction: Non-Carcinogen

Probability: 0.221

Enrichment: 0.686

Bayesian Score: -3.898

Prediction: Positive if the Bayesian score is above the estimated best cutoff value.

Probability: The estimated probability that the sample is in the category.

Enrichment: An estimate of enrichment, that is, the increased likelihood (versus random) of this sample being in the category.

Bayesian Score: The standard Laplacian-modified Bayesian score.

## TOPKAT\_Rat\_Female\_FDA\_None\_vs\_Carcinogen

### Structural Similar Compounds

| Name               | Bupropion                                                           | Chlorpropamide                                                      | Phenobarbital                                                       |
|--------------------|---------------------------------------------------------------------|---------------------------------------------------------------------|---------------------------------------------------------------------|
| Structure          |                                                                     |                                                                     |                                                                     |
| Actual Endpoint    | Non-Carcinogen                                                      | Non-Carcinogen                                                      | Carcinogen                                                          |
| Predicted Endpoint | Non-Carcinogen                                                      | Non-Carcinogen                                                      | Carcinogen                                                          |
| Similarity         | 0.362                                                               | 0.327                                                               | 0.311                                                               |
| Reference          | US FDA (Centre for Drug Eval.& Res./Off. Testing & Res.) Sept. 1997 | US FDA (Centre for Drug Eval.& Res./Off. Testing & Res.) Sept. 1997 | US FDA (Centre for Drug Eval.& Res./Off. Testing & Res.) Sept. 1997 |

### Model Applicability

Missing features are fingerprint features in the query molecule not found in the training set.

1. Missing Feature: FCFP\_10 10 [\*][NH+]([\*])[\*]
2. Missing Feature: FCFP\_10 -1853714334 [\*]C[NH+](C[\*])C[\*]
3. Missing Feature: FCFP\_10 1155241219 [\*]CC[NH+]([\*])[\*]
4. Missing Feature: FCFP\_10 -680623486 [\*][NH+]([\*])[C@H](C)[c](:[\*]):[\*]

### Feature Contribution

| Top features for Carcinogen |            |                  |       |                            |
|-----------------------------|------------|------------------|-------|----------------------------|
| Fingerprint                 | Bit        | Structure/Smiles | Score | Carcinogen in training set |
| FCFP_10                     | -387072142 |                  | 0.376 | 5 out of 10                |

| FCFP_10                         | 907096426   | 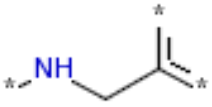   | 0.331  | 3 out of 6                 |
|---------------------------------|-------------|---------------------------------------------------------------------------------------|--------|----------------------------|
| FCFP_10                         | -1043339860 |    | 0.284  | 31 out of 74               |
| Top Features for Non-Carcinogen |             |                                                                                       |        |                            |
| Fingerprint                     | Bit         | Structure/Smiles                                                                      | Score  | Carcinogen in training set |
| FCFP_10                         | 551850122   |    | -0.679 | 9 out of 60                |
| FCFP_10                         | -384723139  |  | -0.661 | 0 out of 3                 |
| FCFP_10                         | -745491832  |  | -0.652 | 7 out of 46                |





$C_{25}H_{29}N_3O_4$

Molecular Weight: 435.51546

ALogP: 2.831

Rotatable Bonds: 8

Acceptors: 4

Donors: 2

## Model Prediction

Prediction: Single-Carcinogen

Probability: 0.324

Enrichment: 0.866

Bayesian Score: -5.468

Prediction: Positive if the Bayesian score is above the estimated best cutoff value.

Probability: The estimated probability that the sample is in the category.

Enrichment: An estimate of enrichment, that is, the increased likelihood (versus random) of this sample being in the category.

Bayesian Score: The standard Laplacian-modified Bayesian score.

## Structural Similar Compounds

| Name               | Deserpidine                                                         | Reserpine                                                           | Mesuprine                                                           |
|--------------------|---------------------------------------------------------------------|---------------------------------------------------------------------|---------------------------------------------------------------------|
| Structure          |                                                                     |                                                                     |                                                                     |
| Actual Endpoint    | Single-Carcinogen                                                   | Single-Carcinogen                                                   | Single-Carcinogen                                                   |
| Predicted Endpoint | Single-Carcinogen                                                   | Single-Carcinogen                                                   | Single-Carcinogen                                                   |
| Similarity         | 0.377                                                               | 0.352                                                               | 0.303                                                               |
| Reference          | US FDA (Centre for Drug Eval.& Res./Off. Testing & Res.) Sept. 1997 | US FDA (Centre for Drug Eval.& Res./Off. Testing & Res.) Sept. 1997 | US FDA (Centre for Drug Eval.& Res./Off. Testing & Res.) Sept. 1997 |

## Model Applicability

Missing features are fingerprint features in the query molecule not found in the training set.

- Missing Feature: SCFP\_4 -587479743 [\*]N([\*])C[c](:[\*]):[\*]

## Feature Contribution

### Top features for Multiple-Carcinogen

| Fingerprint | Bit        | Structure/Smiles | Score | Multiple-Carcinogen in training set |
|-------------|------------|------------------|-------|-------------------------------------|
| SCFP_4      | -111024397 |                  | 0.351 | 4 out of 8                          |

| SCFP_4                             | 1256995004  | 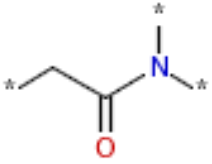   | 0.327  | 10 out of 22                        |
|------------------------------------|-------------|---------------------------------------------------------------------------------------|--------|-------------------------------------|
| SCFP_4                             | -1374800107 |    | 0.288  | 10 out of 23                        |
| Top Features for Single-Carcinogen |             |                                                                                       |        |                                     |
| Fingerprint                        | Bit         | Structure/Smiles                                                                      | Score  | Multiple-Carcinogen in training set |
| SCFP_4                             | -1272709286 |    | -1.157 | 1 out of 17                         |
| SCFP_4                             | -1211866396 |  | -1.062 | 0 out of 6                          |
| SCFP_4                             | -1343150366 |  | -0.946 | 0 out of 5                          |





$C_{22}H_{22}N_4O_3$

Molecular Weight: 390.43508

ALogP: 1.807

Rotatable Bonds: 6

Acceptors: 3

Donors: 4

## Model Prediction

Prediction: Single-Carcinogen

Probability: 0.443

Enrichment: 1.185

Bayesian Score: -1.750

Prediction: Positive if the Bayesian score is above the estimated best cutoff value.

Probability: The estimated probability that the sample is in the category.

Enrichment: An estimate of enrichment, that is, the increased likelihood (versus random) of this sample being in the category.

Bayesian Score: The standard Laplacian-modified Bayesian score.

## Structural Similar Compounds

| Name               | Prilocaine                                                          | Pergolide                                                           | Aminogluthethimide                                                  |
|--------------------|---------------------------------------------------------------------|---------------------------------------------------------------------|---------------------------------------------------------------------|
| Structure          |                                                                     |                                                                     |                                                                     |
| Actual Endpoint    | Multiple-Carcinogen                                                 | Single-Carcinogen                                                   | Multiple-Carcinogen                                                 |
| Predicted Endpoint | Multiple-Carcinogen                                                 | Single-Carcinogen                                                   | Multiple-Carcinogen                                                 |
| Similarity         | 0.400                                                               | 0.344                                                               | 0.283                                                               |
| Reference          | US FDA (Centre for Drug Eval.& Res./Off. Testing & Res.) Sept. 1997 | US FDA (Centre for Drug Eval.& Res./Off. Testing & Res.) Sept. 1997 | US FDA (Centre for Drug Eval.& Res./Off. Testing & Res.) Sept. 1997 |

## Model Applicability

Missing features are fingerprint features in the query molecule not found in the training set.

1. All descriptors are in range.

## Feature Contribution

### Top features for Multiple-Carcinogen

| Fingerprint | Bit        | Structure/Smiles | Score | Multiple-Carcinogen in training set |
|-------------|------------|------------------|-------|-------------------------------------|
| SCFP_4      | 2097618059 |                  | 0.730 | 5 out of 6                          |

| SCFP_4                             | 1631845520  | 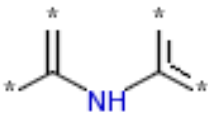   | 0.601  | 6 out of 9                          |
|------------------------------------|-------------|---------------------------------------------------------------------------------------|--------|-------------------------------------|
| SCFP_4                             | -1375926917 |    | 0.522  | 6 out of 10                         |
| Top Features for Single-Carcinogen |             |                                                                                       |        |                                     |
| Fingerprint                        | Bit         | Structure/Smiles                                                                      | Score  | Multiple-Carcinogen in training set |
| SCFP_4                             | -1272709286 |    | -1.157 | 1 out of 17                         |
| SCFP_4                             | -1946889102 |  | -0.816 | 0 out of 4                          |
| SCFP_4                             | 622342378   |  | -0.816 | 0 out of 4                          |





$C_{19}H_{23}N_3O_4S$

Molecular Weight: 389.46862

ALogP: 1.461

Rotatable Bonds: 7

Acceptors: 5

Donors: 1

## Model Prediction

Prediction: Single-Carcinogen

Probability: 0.405

Enrichment: 1.083

Bayesian Score: -3.161

Prediction: Positive if the Bayesian score is above the estimated best cutoff value.

Probability: The estimated probability that the sample is in the category.

Enrichment: An estimate of enrichment, that is, the increased likelihood (versus random) of this sample being in the category.

Bayesian Score: The standard Laplacian-modified Bayesian score.

## Structural Similar Compounds

| Name               | Sulfamethazine                                                      | Furothiazole                                                        | Omeprazole                                                          |
|--------------------|---------------------------------------------------------------------|---------------------------------------------------------------------|---------------------------------------------------------------------|
| Structure          |                                                                     |                                                                     |                                                                     |
| Actual Endpoint    | Single-Carcinogen                                                   | Single-Carcinogen                                                   | Multiple-Carcinogen                                                 |
| Predicted Endpoint | Single-Carcinogen                                                   | Multiple-Carcinogen                                                 | Multiple-Carcinogen                                                 |
| Similarity         | 0.314                                                               | 0.302                                                               | 0.290                                                               |
| Reference          | US FDA (Centre for Drug Eval.& Res./Off. Testing & Res.) Sept. 1997 | US FDA (Centre for Drug Eval.& Res./Off. Testing & Res.) Sept. 1997 | US FDA (Centre for Drug Eval.& Res./Off. Testing & Res.) Sept. 1997 |

## Model Applicability

Missing features are fingerprint features in the query molecule not found in the training set.

1. All descriptors are in range.

## Feature Contribution

### Top features for Multiple-Carcinogen

| Fingerprint | Bit        | Structure/Smiles | Score | Multiple-Carcinogen in training set |
|-------------|------------|------------------|-------|-------------------------------------|
| SCFP_4      | 1631845520 |                  | 0.601 | 6 out of 9                          |

|                                    |             |                                                                                       |        |                                     |
|------------------------------------|-------------|---------------------------------------------------------------------------------------|--------|-------------------------------------|
| SCFP_4                             | 17          |    | 0.548  | 10 out of 17                        |
| SCFP_4                             | 1310748454  |    | 0.444  | 4 out of 7                          |
| Top Features for Single-Carcinogen |             |                                                                                       |        |                                     |
| Fingerprint                        | Bit         | Structure/Smiles                                                                      | Score  | Multiple-Carcinogen in training set |
| SCFP_4                             | -1272709286 |    | -1.157 | 1 out of 17                         |
| SCFP_4                             | -1211866396 |  | -1.062 | 0 out of 6                          |
| SCFP_4                             | -1343150366 |  | -0.946 | 0 out of 5                          |







$C_{23}H_{26}N_4O_2$

Molecular Weight: 390.47814

ALogP: 2.702

Rotatable Bonds: 5

Acceptors: 2

Donors: 2

## Model Prediction

Prediction: Single-Carcinogen

Probability: 0.387

Enrichment: 1.034

Bayesian Score: -3.730

Prediction: Positive if the Bayesian score is above the estimated best cutoff value.

Probability: The estimated probability that the sample is in the category.

Enrichment: An estimate of enrichment, that is, the increased likelihood (versus random) of this sample being in the category.

Bayesian Score: The standard Laplacian-modified Bayesian score.

## Structural Similar Compounds

| Name               | Deserpidine                                                         | Pergolide                                                           | Bromocriptine                                                       |
|--------------------|---------------------------------------------------------------------|---------------------------------------------------------------------|---------------------------------------------------------------------|
| Structure          |                                                                     |                                                                     |                                                                     |
| Actual Endpoint    | Single-Carcinogen                                                   | Single-Carcinogen                                                   | Single-Carcinogen                                                   |
| Predicted Endpoint | Single-Carcinogen                                                   | Single-Carcinogen                                                   | Single-Carcinogen                                                   |
| Similarity         | 0.304                                                               | 0.286                                                               | 0.274                                                               |
| Reference          | US FDA (Centre for Drug Eval.& Res./Off. Testing & Res.) Sept. 1997 | US FDA (Centre for Drug Eval.& Res./Off. Testing & Res.) Sept. 1997 | US FDA (Centre for Drug Eval.& Res./Off. Testing & Res.) Sept. 1997 |

## Model Applicability

Missing features are fingerprint features in the query molecule not found in the training set.

- Missing Feature: SCFP\_4 -587479743 [\*]N[\*]C[c](:[\*]):[\*]

## Feature Contribution

### Top features for Multiple-Carcinogen

| Fingerprint | Bit         | Structure/Smiles | Score | Multiple-Carcinogen in training set |
|-------------|-------------|------------------|-------|-------------------------------------|
| SCFP_4      | -1629661413 |                  | 0.433 | 2 out of 3                          |

| SCFP_4                             | -111024397  | 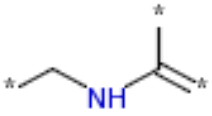   | 0.351  | 4 out of 8                          |
|------------------------------------|-------------|---------------------------------------------------------------------------------------|--------|-------------------------------------|
| SCFP_4                             | 1256995004  |    | 0.327  | 10 out of 22                        |
| Top Features for Single-Carcinogen |             |                                                                                       |        |                                     |
| Fingerprint                        | Bit         | Structure/Smiles                                                                      | Score  | Multiple-Carcinogen in training set |
| SCFP_4                             | -1272709286 |    | -1.157 | 1 out of 17                         |
| SCFP_4                             | -1343150366 |  | -0.946 | 0 out of 5                          |
| SCFP_4                             | 622342378   |  | -0.816 | 0 out of 4                          |





$C_{28}H_{34}N_5O_2$

Molecular Weight: 472.60186

ALogP: 1.567

Rotatable Bonds: 6

Acceptors: 2

Donors: 3

## Model Prediction

Prediction: Single-Carcinogen

Probability: 0.362

Enrichment: 0.968

Bayesian Score: -4.447

Prediction: Positive if the Bayesian score is above the estimated best cutoff value.

Probability: The estimated probability that the sample is in the category.

Enrichment: An estimate of enrichment, that is, the increased likelihood (versus random) of this sample being in the category.

Bayesian Score: The standard Laplacian-modified Bayesian score.

## Structural Similar Compounds

| Name               | Bromocriptine                                                       | Deserpidine                                                         | Pergolide                                                           |
|--------------------|---------------------------------------------------------------------|---------------------------------------------------------------------|---------------------------------------------------------------------|
| Structure          |                                                                     |                                                                     |                                                                     |
| Actual Endpoint    | Single-Carcinogen                                                   | Single-Carcinogen                                                   | Single-Carcinogen                                                   |
| Predicted Endpoint | Single-Carcinogen                                                   | Single-Carcinogen                                                   | Single-Carcinogen                                                   |
| Similarity         | 0.272                                                               | 0.266                                                               | 0.247                                                               |
| Reference          | US FDA (Centre for Drug Eval.& Res./Off. Testing & Res.) Sept. 1997 | US FDA (Centre for Drug Eval.& Res./Off. Testing & Res.) Sept. 1997 | US FDA (Centre for Drug Eval.& Res./Off. Testing & Res.) Sept. 1997 |

## Model Applicability

Missing features are fingerprint features in the query molecule not found in the training set.

1. Missing Feature: SCFP\_4 11 [\*][NH+]([\*])([\*])
2. Missing Feature: SCFP\_4 -587479743 [\*]N([\*])C[c](:[\*]):[\*]
3. Missing Feature: SCFP\_4 1930718785 [\*]C[NH+](C[\*])C[\*]
4. Missing Feature: SCFP\_4 -1396915742 [\*]CC[NH+]([\*])([\*])
5. Missing Feature: SCFP\_4 -1396885951 [\*][NH+]([\*])CC=[\*]

## Feature Contribution

| Top features for Multiple-Carcinogen |           |                  |       |                                     |
|--------------------------------------|-----------|------------------|-------|-------------------------------------|
| Fingerprint                          | Bit       | Structure/Smiles | Score | Multiple-Carcinogen in training set |
| SCFP_4                               | 387787917 |                  | 0.449 | 6 out of 11                         |

| SCFP_4                             | -1629661413 | 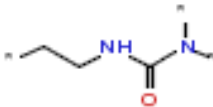   | 0.433  | 2 out of 3                          |
|------------------------------------|-------------|---------------------------------------------------------------------------------------|--------|-------------------------------------|
| SCFP_4                             | -111024397  |    | 0.351  | 4 out of 8                          |
| Top Features for Single-Carcinogen |             |                                                                                       |        |                                     |
| Fingerprint                        | Bit         | Structure/Smiles                                                                      | Score  | Multiple-Carcinogen in training set |
| SCFP_4                             | -1272709286 |    | -1.157 | 1 out of 17                         |
| SCFP_4                             | -1343150366 |  | -0.946 | 0 out of 5                          |
| SCFP_4                             | 622342378   |  | -0.816 | 0 out of 4                          |





$C_{24}H_{27}NO_7$

Molecular Weight: 441.47368

ALogP: 3.388

Rotatable Bonds: 9

Acceptors: 7

Donors: 1

## Model Prediction

Prediction: Non-Carcinogen

Probability: 0.231

Enrichment: 0.692

Bayesian Score: -6.420

Prediction: Positive if the Bayesian score is above the estimated best cutoff value.

Probability: The estimated probability that the sample is in the category.

Enrichment: An estimate of enrichment, that is, the increased likelihood (versus random) of this sample being in the category.

Bayesian Score: The standard Laplacian-modified Bayesian score.

## Structural Similar Compounds

| Name               | Mesuprine                                                           | Nabumetone                                                          | Atenolol                                                            |
|--------------------|---------------------------------------------------------------------|---------------------------------------------------------------------|---------------------------------------------------------------------|
| Structure          |                                                                     |                                                                     |                                                                     |
| Actual Endpoint    | Non-Carcinogen                                                      | Non-Carcinogen                                                      | Carcinogen                                                          |
| Predicted Endpoint | Non-Carcinogen                                                      | Non-Carcinogen                                                      | Non-Carcinogen                                                      |
| Similarity         | 0.415                                                               | 0.395                                                               | 0.383                                                               |
| Reference          | US FDA (Centre for Drug Eval.& Res./Off. Testing & Res.) Sept. 1997 | US FDA (Centre for Drug Eval.& Res./Off. Testing & Res.) Sept. 1997 | US FDA (Centre for Drug Eval.& Res./Off. Testing & Res.) Sept. 1997 |

## Model Applicability

Missing features are fingerprint features in the query molecule not found in the training set.

1. All descriptors are in range.

## Feature Contribution

### Top features for Carcinogen

| Fingerprint | Bit        | Structure/Smiles | Score | Carcinogen in training set |
|-------------|------------|------------------|-------|----------------------------|
| SCFP_12     | -392286499 |                  | 0.610 | 2 out of 2                 |



| SCFP_12                         | 470041467   | 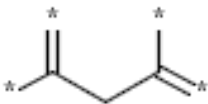   | 0.433  | 2 out of 3                 |
|---------------------------------|-------------|---------------------------------------------------------------------------------------|--------|----------------------------|
| SCFP_12                         | 55523958    |    | 0.433  | 2 out of 3                 |
| Top Features for Non-Carcinogen |             |                                                                                       |        |                            |
| Fingerprint                     | Bit         | Structure/Smiles                                                                      | Score  | Carcinogen in training set |
| SCFP_12                         | -1642341584 |    | -1.258 | 0 out of 8                 |
| SCFP_12                         | -1211866396 |  | -1.084 | 2 out of 25                |
| SCFP_12                         | -1849236245 |  | -0.815 | 0 out of 4                 |


 $C_{25}H_{29}N_3O_4$ 

Molecular Weight: 435.51546

ALogP: 2.831

Rotatable Bonds: 8

Acceptors: 4

Donors: 2

## Model Prediction

Prediction: Non-Carcinogen

Probability: 0.229

Enrichment: 0.684

Bayesian Score: -7.143

Prediction: Positive if the Bayesian score is above the estimated best cutoff value.

Probability: The estimated probability that the sample is in the category.

Enrichment: An estimate of enrichment, that is, the increased likelihood (versus random) of this sample being in the category.

Bayesian Score: The standard Laplacian-modified Bayesian score.

## Structural Similar Compounds

| Name               | Deserpidine                                                         | Reserpine                                                           | Pergolide                                                           |
|--------------------|---------------------------------------------------------------------|---------------------------------------------------------------------|---------------------------------------------------------------------|
| Structure          |                                                                     |                                                                     |                                                                     |
| Actual Endpoint    | Carcinogen                                                          | Carcinogen                                                          | Non-Carcinogen                                                      |
| Predicted Endpoint | Carcinogen                                                          | Carcinogen                                                          | Non-Carcinogen                                                      |
| Similarity         | 0.377                                                               | 0.352                                                               | 0.303                                                               |
| Reference          | US FDA (Centre for Drug Eval.& Res./Off. Testing & Res.) Sept. 1997 | US FDA (Centre for Drug Eval.& Res./Off. Testing & Res.) Sept. 1997 | US FDA (Centre for Drug Eval.& Res./Off. Testing & Res.) Sept. 1997 |

## Model Applicability

Missing features are fingerprint features in the query molecule not found in the training set.

1. All descriptors are in range.

## Feature Contribution

### Top features for Carcinogen

| Fingerprint | Bit        | Structure/Smiles | Score | Carcinogen in training set |
|-------------|------------|------------------|-------|----------------------------|
| SCFP_12     | 1651620003 |                  | 0.657 | 7 out of 10                |

| SCFP_12                         | -1379673609 | 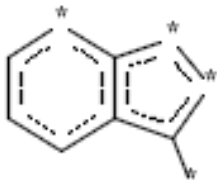   | 0.541  | 11 out of 19               |
|---------------------------------|-------------|---------------------------------------------------------------------------------------|--------|----------------------------|
| SCFP_12                         | 1655199790  |    | 0.533  | 5 out of 8                 |
| Top Features for Non-Carcinogen |             |                                                                                       |        |                            |
| Fingerprint                     | Bit         | Structure/Smiles                                                                      | Score  | Carcinogen in training set |
| SCFP_12                         | -1642341584 |    | -1.258 | 0 out of 8                 |
| SCFP_12                         | -1211866396 |  | -1.084 | 2 out of 25                |
| SCFP_12                         | -1849236245 |  | -0.815 | 0 out of 4                 |



$C_{29}H_{24}FNO_5$

Molecular Weight: 485.50296

ALogP: 5.695

Rotatable Bonds: 7

Acceptors: 4

Donors: 2

## Model Prediction

Prediction: Non-Carcinogen

Probability: 0.278

Enrichment: 0.832

Bayesian Score: -1.052

Prediction: Positive if the Bayesian score is above the estimated best cutoff value.

Probability: The estimated probability that the sample is in the category.

Enrichment: An estimate of enrichment, that is, the increased likelihood (versus random) of this sample being in the category.

Bayesian Score: The standard Laplacian-modified Bayesian score.

## Structural Similar Compounds

| Name               | Glyburide                                                           | Fluvastatin                                                         | Glimepride                                                          |
|--------------------|---------------------------------------------------------------------|---------------------------------------------------------------------|---------------------------------------------------------------------|
| Structure          |                                                                     |                                                                     |                                                                     |
| Actual Endpoint    | Non-Carcinogen                                                      | Carcinogen                                                          | Non-Carcinogen                                                      |
| Predicted Endpoint | Non-Carcinogen                                                      | Carcinogen                                                          | Non-Carcinogen                                                      |
| Similarity         | 0.357                                                               | 0.324                                                               | 0.319                                                               |
| Reference          | US FDA (Centre for Drug Eval.& Res./Off. Testing & Res.) Sept. 1997 | US FDA (Centre for Drug Eval.& Res./Off. Testing & Res.) Sept. 1997 | US FDA (Centre for Drug Eval.& Res./Off. Testing & Res.) Sept. 1997 |

## Model Applicability

Missing features are fingerprint features in the query molecule not found in the training set.

1. All descriptors are in range.

## Feature Contribution

### Top features for Carcinogen

| Fingerprint | Bit       | Structure/Smiles | Score | Carcinogen in training set |
|-------------|-----------|------------------|-------|----------------------------|
| SCFP_12     | 112644006 |                  | 0.721 | 3 out of 3                 |

| SCFP_12                         | 794417578   | 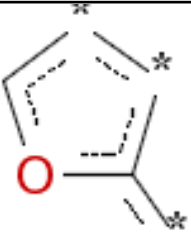    | 0.615  | 9 out of 14                |
|---------------------------------|-------------|---------------------------------------------------------------------------------------|--------|----------------------------|
| SCFP_12                         | -392286499  |    | 0.610  | 2 out of 2                 |
| Top Features for Non-Carcinogen |             |                                                                                       |        |                            |
| Fingerprint                     | Bit         | Structure/Smiles                                                                      | Score  | Carcinogen in training set |
| SCFP_12                         | -1642341584 |    | -1.258 | 0 out of 8                 |
| SCFP_12                         | -1211866396 |  | -1.084 | 2 out of 25                |
| SCFP_12                         | -1849236245 |  | -0.815 | 0 out of 4                 |



$C_{22}H_{22}N_4O_3$

Molecular Weight: 390.43508

ALogP: 1.807

Rotatable Bonds: 6

Acceptors: 3

Donors: 4

## Model Prediction

Prediction: Non-Carcinogen

Probability: 0.242

Enrichment: 0.725

Bayesian Score: -4.493

Prediction: Positive if the Bayesian score is above the estimated best cutoff value.

Probability: The estimated probability that the sample is in the category.

Enrichment: An estimate of enrichment, that is, the increased likelihood (versus random) of this sample being in the category.

Bayesian Score: The standard Laplacian-modified Bayesian score.

## Structural Similar Compounds

| Name               | Tryptophan                                                          | Prilocaine                                                          | Sumatriptan                                                         |
|--------------------|---------------------------------------------------------------------|---------------------------------------------------------------------|---------------------------------------------------------------------|
| Structure          |                                                                     |                                                                     |                                                                     |
| Actual Endpoint    | Non-Carcinogen                                                      | Carcinogen                                                          | Non-Carcinogen                                                      |
| Predicted Endpoint | Non-Carcinogen                                                      | Carcinogen                                                          | Non-Carcinogen                                                      |
| Similarity         | 0.440                                                               | 0.400                                                               | 0.375                                                               |
| Reference          | US FDA (Centre for Drug Eval.& Res./Off. Testing & Res.) Sept. 1997 | US FDA (Centre for Drug Eval.& Res./Off. Testing & Res.) Sept. 1997 | US FDA (Centre for Drug Eval.& Res./Off. Testing & Res.) Sept. 1997 |

## Model Applicability

Missing features are fingerprint features in the query molecule not found in the training set.

1. All descriptors are in range.

## Feature Contribution

### Top features for Carcinogen

| Fingerprint | Bit        | Structure/Smiles | Score | Carcinogen in training set |
|-------------|------------|------------------|-------|----------------------------|
| SCFP_12     | 1651620003 |                  | 0.657 | 7 out of 10                |

| SCFP_12                         | -1379673609 | 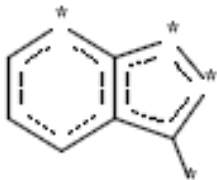   | 0.541  | 11 out of 19               |
|---------------------------------|-------------|---------------------------------------------------------------------------------------|--------|----------------------------|
| SCFP_12                         | 1655199790  |    | 0.533  | 5 out of 8                 |
| Top Features for Non-Carcinogen |             |                                                                                       |        |                            |
| Fingerprint                     | Bit         | Structure/Smiles                                                                      | Score  | Carcinogen in training set |
| SCFP_12                         | -1946889102 |    | -0.871 | 1 out of 12                |
| SCFP_12                         | -1849236245 |  | -0.815 | 0 out of 4                 |
| SCFP_12                         | -1770674960 |  | -0.665 | 0 out of 3                 |



$C_{19}H_{23}N_3O_4S$

Molecular Weight: 389.46862

ALogP: 1.461

Rotatable Bonds: 7

Acceptors: 5

Donors: 1

## Model Prediction

Prediction: Non-Carcinogen

Probability: 0.244

Enrichment: 0.730

Bayesian Score: -4.294

Prediction: Positive if the Bayesian score is above the estimated best cutoff value.

Probability: The estimated probability that the sample is in the category.

Enrichment: An estimate of enrichment, that is, the increased likelihood (versus random) of this sample being in the category.

Bayesian Score: The standard Laplacian-modified Bayesian score.

## Structural Similar Compounds

| Name               | Praziquantel                                                        | Sulfamethazine                                                      | Furothiazole                                                        |
|--------------------|---------------------------------------------------------------------|---------------------------------------------------------------------|---------------------------------------------------------------------|
| Structure          |                                                                     |                                                                     |                                                                     |
| Actual Endpoint    | Non-Carcinogen                                                      | Carcinogen                                                          | Carcinogen                                                          |
| Predicted Endpoint | Non-Carcinogen                                                      | Carcinogen                                                          | Carcinogen                                                          |
| Similarity         | 0.315                                                               | 0.314                                                               | 0.302                                                               |
| Reference          | US FDA (Centre for Drug Eval.& Res./Off. Testing & Res.) Sept. 1997 | US FDA (Centre for Drug Eval.& Res./Off. Testing & Res.) Sept. 1997 | US FDA (Centre for Drug Eval.& Res./Off. Testing & Res.) Sept. 1997 |

## Model Applicability

Missing features are fingerprint features in the query molecule not found in the training set.

1. All descriptors are in range.

## Feature Contribution

### Top features for Carcinogen

| Fingerprint | Bit        | Structure/Smiles | Score | Carcinogen in training set |
|-------------|------------|------------------|-------|----------------------------|
| SCFP_12     | -100019659 |                  | 0.610 | 2 out of 2                 |



| SCFP_12                         | 1310748454  | 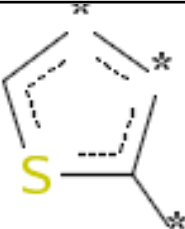    | 0.451  | 7 out of 13                |
|---------------------------------|-------------|---------------------------------------------------------------------------------------|--------|----------------------------|
| SCFP_12                         | -614089895  |    | 0.419  | 1 out of 1                 |
| Top Features for Non-Carcinogen |             |                                                                                       |        |                            |
| Fingerprint                     | Bit         | Structure/Smiles                                                                      | Score  | Carcinogen in training set |
| SCFP_12                         | -1642341584 |    | -1.258 | 0 out of 8                 |
| SCFP_12                         | -1211866396 |  | -1.084 | 2 out of 25                |
| SCFP_12                         | -1849236245 |  | -0.815 | 0 out of 4                 |



$C_{23}H_{26}N_2O_6$

Molecular Weight: 426.46234

ALogP: 1.967

Rotatable Bonds: 7

Acceptors: 6

Donors: 1

## Model Prediction

Prediction: Non-Carcinogen

Probability: 0.235

Enrichment: 0.703

Bayesian Score: -5.668

Prediction: Positive if the Bayesian score is above the estimated best cutoff value.

Probability: The estimated probability that the sample is in the category.

Enrichment: An estimate of enrichment, that is, the increased likelihood (versus random) of this sample being in the category.

Bayesian Score: The standard Laplacian-modified Bayesian score.

## Structural Similar Compounds

| Name               | Phenacetin                                                          | Nitroacetophenetide                                                 | Carteolol                                                           |
|--------------------|---------------------------------------------------------------------|---------------------------------------------------------------------|---------------------------------------------------------------------|
| Structure          |                                                                     |                                                                     |                                                                     |
| Actual Endpoint    | Carcinogen                                                          | Non-Carcinogen                                                      | Non-Carcinogen                                                      |
| Predicted Endpoint | Carcinogen                                                          | Carcinogen                                                          | Non-Carcinogen                                                      |
| Similarity         | 0.425                                                               | 0.409                                                               | 0.358                                                               |
| Reference          | US FDA (Centre for Drug Eval.& Res./Off. Testing & Res.) Sept. 1997 | US FDA (Centre for Drug Eval.& Res./Off. Testing & Res.) Sept. 1997 | US FDA (Centre for Drug Eval.& Res./Off. Testing & Res.) Sept. 1997 |

## Model Applicability

Missing features are fingerprint features in the query molecule not found in the training set.

1. All descriptors are in range.

## Feature Contribution

### Top features for Carcinogen

| Fingerprint | Bit        | Structure/Smiles | Score | Carcinogen in training set |
|-------------|------------|------------------|-------|----------------------------|
| SCFP_12     | -347048986 |                  | 0.627 | 5 out of 7                 |

| SCFP_12                         | 2097618059  | 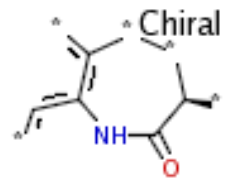   | 0.451  | 7 out of 13                |
|---------------------------------|-------------|---------------------------------------------------------------------------------------|--------|----------------------------|
| SCFP_12                         | -1329734318 |    | 0.419  | 1 out of 1                 |
| Top Features for Non-Carcinogen |             |                                                                                       |        |                            |
| Fingerprint                     | Bit         | Structure/Smiles                                                                      | Score  | Carcinogen in training set |
| SCFP_12                         | -1642341584 |    | -1.258 | 0 out of 8                 |
| SCFP_12                         | -1211866396 |  | -1.084 | 2 out of 25                |
| SCFP_12                         | -1849236245 |  | -0.815 | 0 out of 4                 |



$C_{24}H_{27}N_5O_4$

Molecular Weight: 449.50228

ALogP: 1.731

Rotatable Bonds: 9

Acceptors: 6

Donors: 1

## Model Prediction

Prediction: Non-Carcinogen

Probability: 0.284

Enrichment: 0.851

Bayesian Score: -0.599

Prediction: Positive if the Bayesian score is above the estimated best cutoff value.

Probability: The estimated probability that the sample is in the category.

Enrichment: An estimate of enrichment, that is, the increased likelihood (versus random) of this sample being in the category.

Bayesian Score: The standard Laplacian-modified Bayesian score.

## Structural Similar Compounds

| Name               | Phenacetin                                                          | Nitroacetophenetide                                                 | Praziquantel                                                        |
|--------------------|---------------------------------------------------------------------|---------------------------------------------------------------------|---------------------------------------------------------------------|
| Structure          |                                                                     |                                                                     |                                                                     |
| Actual Endpoint    | Carcinogen                                                          | Non-Carcinogen                                                      | Non-Carcinogen                                                      |
| Predicted Endpoint | Carcinogen                                                          | Carcinogen                                                          | Non-Carcinogen                                                      |
| Similarity         | 0.314                                                               | 0.309                                                               | 0.293                                                               |
| Reference          | US FDA (Centre for Drug Eval.& Res./Off. Testing & Res.) Sept. 1997 | US FDA (Centre for Drug Eval.& Res./Off. Testing & Res.) Sept. 1997 | US FDA (Centre for Drug Eval.& Res./Off. Testing & Res.) Sept. 1997 |

## Model Applicability

Missing features are fingerprint features in the query molecule not found in the training set.

1. All descriptors are in range.

## Feature Contribution

### Top features for Carcinogen

| Fingerprint | Bit       | Structure/Smiles | Score | Carcinogen in training set |
|-------------|-----------|------------------|-------|----------------------------|
| SCFP_12     | 599957850 |                  | 0.721 | 3 out of 3                 |

| SCFP_12                         | -443296553  | 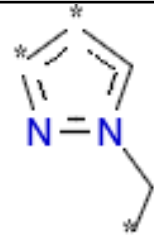    | 0.664  | 4 out of 5                 |
|---------------------------------|-------------|---------------------------------------------------------------------------------------|--------|----------------------------|
| SCFP_12                         | -347048986  |    | 0.627  | 5 out of 7                 |
| Top Features for Non-Carcinogen |             |                                                                                       |        |                            |
| Fingerprint                     | Bit         | Structure/Smiles                                                                      | Score  | Carcinogen in training set |
| SCFP_12                         | -1642341584 |    | -1.258 | 0 out of 8                 |
| SCFP_12                         | -1211866396 |  | -1.084 | 2 out of 25                |
| SCFP_12                         | -1849236245 |  | -0.815 | 0 out of 4                 |



$C_{22}H_{24}N_2O_4$

Molecular Weight: 380.43696

ALogP: 3.001

Rotatable Bonds: 8

Acceptors: 4

Donors: 1

## Model Prediction

Prediction: Non-Carcinogen

Probability: 0.227

Enrichment: 0.679

Bayesian Score: -7.695

Prediction: Positive if the Bayesian score is above the estimated best cutoff value.

Probability: The estimated probability that the sample is in the category.

Enrichment: An estimate of enrichment, that is, the increased likelihood (versus random) of this sample being in the category.

Bayesian Score: The standard Laplacian-modified Bayesian score.

## Structural Similar Compounds

| Name               | Propafenone                                                         | Glyburide                                                           | Mesuprine                                                           |
|--------------------|---------------------------------------------------------------------|---------------------------------------------------------------------|---------------------------------------------------------------------|
| Structure          |                                                                     |                                                                     |                                                                     |
| Actual Endpoint    | Non-Carcinogen                                                      | Non-Carcinogen                                                      | Non-Carcinogen                                                      |
| Predicted Endpoint | Non-Carcinogen                                                      | Non-Carcinogen                                                      | Non-Carcinogen                                                      |
| Similarity         | 0.345                                                               | 0.344                                                               | 0.333                                                               |
| Reference          | US FDA (Centre for Drug Eval.& Res./Off. Testing & Res.) Sept. 1997 | US FDA (Centre for Drug Eval.& Res./Off. Testing & Res.) Sept. 1997 | US FDA (Centre for Drug Eval.& Res./Off. Testing & Res.) Sept. 1997 |

## Model Applicability

Missing features are fingerprint features in the query molecule not found in the training set.

- Missing Feature: SCFP\_12 1964617636 [\*]C(=[\*])Cn(:[\*]):[\*]

## Feature Contribution

### Top features for Carcinogen

| Fingerprint | Bit        | Structure/Smiles | Score | Carcinogen in training set |
|-------------|------------|------------------|-------|----------------------------|
| SCFP_12     | 1651620003 |                  | 0.657 | 7 out of 10                |

| SCFP_12                         | -1379673609 | 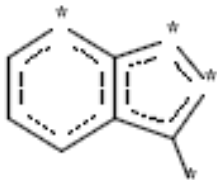   | 0.541  | 11 out of 19               |
|---------------------------------|-------------|---------------------------------------------------------------------------------------|--------|----------------------------|
| SCFP_12                         | 1655199790  |    | 0.533  | 5 out of 8                 |
| Top Features for Non-Carcinogen |             |                                                                                       |        |                            |
| Fingerprint                     | Bit         | Structure/Smiles                                                                      | Score  | Carcinogen in training set |
| SCFP_12                         | -1642341584 |    | -1.258 | 0 out of 8                 |
| SCFP_12                         | -1211866396 |  | -1.084 | 2 out of 25                |
| SCFP_12                         | -1849236245 |  | -0.815 | 0 out of 4                 |



$C_{23}H_{26}N_4O_2$

Molecular Weight: 390.47814

ALogP: 2.702

Rotatable Bonds: 5

Acceptors: 2

Donors: 2

## Model Prediction

Prediction: Carcinogen

Probability: 0.293

Enrichment: 0.876

Bayesian Score: -0.042

Prediction: Positive if the Bayesian score is above the estimated best cutoff value.

Probability: The estimated probability that the sample is in the category.

Enrichment: An estimate of enrichment, that is, the increased likelihood (versus random) of this sample being in the category.

Bayesian Score: The standard Laplacian-modified Bayesian score.

## Structural Similar Compounds

| Name               | Etodolac                                                            | Tryptophan                                                          | Deserpidine                                                         |
|--------------------|---------------------------------------------------------------------|---------------------------------------------------------------------|---------------------------------------------------------------------|
| Structure          |                                                                     |                                                                     |                                                                     |
| Actual Endpoint    | Non-Carcinogen                                                      | Non-Carcinogen                                                      | Carcinogen                                                          |
| Predicted Endpoint | Non-Carcinogen                                                      | Non-Carcinogen                                                      | Carcinogen                                                          |
| Similarity         | 0.368                                                               | 0.340                                                               | 0.304                                                               |
| Reference          | US FDA (Centre for Drug Eval.& Res./Off. Testing & Res.) Sept. 1997 | US FDA (Centre for Drug Eval.& Res./Off. Testing & Res.) Sept. 1997 | US FDA (Centre for Drug Eval.& Res./Off. Testing & Res.) Sept. 1997 |

## Model Applicability

Missing features are fingerprint features in the query molecule not found in the training set.

1. All descriptors are in range.

## Feature Contribution

### Top features for Carcinogen

| Fingerprint | Bit        | Structure/Smiles | Score | Carcinogen in training set |
|-------------|------------|------------------|-------|----------------------------|
| SCFP_12     | 1651620003 |                  | 0.657 | 7 out of 10                |



| SCFP_12                         | 1962031760  | 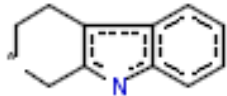   | 0.610  | 2 out of 2                 |
|---------------------------------|-------------|---------------------------------------------------------------------------------------|--------|----------------------------|
| SCFP_12                         | -1379673609 |    | 0.541  | 11 out of 19               |
| Top Features for Non-Carcinogen |             |                                                                                       |        |                            |
| Fingerprint                     | Bit         | Structure/Smiles                                                                      | Score  | Carcinogen in training set |
| SCFP_12                         | -1849236245 |    | -0.815 | 0 out of 4                 |
| SCFP_12                         | -1343150366 |  | -0.644 | 3 out of 21                |
| SCFP_12                         | 1653911926  |  | -0.487 | 12 out of 64               |

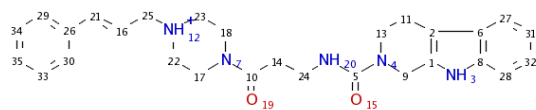

$C_{28}H_{34}N_5O_2$

Molecular Weight: 472.60186

ALogP: 1.567

Rotatable Bonds: 6

Acceptors: 2

Donors: 3

## Model Prediction

Prediction: Carcinogen

Probability: 0.302

Enrichment: 0.903

Bayesian Score: 0.504

Prediction: Positive if the Bayesian score is above the estimated best cutoff value.

Probability: The estimated probability that the sample is in the category.

Enrichment: An estimate of enrichment, that is, the increased likelihood (versus random) of this sample being in the category.

Bayesian Score: The standard Laplacian-modified Bayesian score.

## Structural Similar Compounds

| Name               | Etodolac                                                            | Tryptophan                                                          | Bromocriptine                                                       |
|--------------------|---------------------------------------------------------------------|---------------------------------------------------------------------|---------------------------------------------------------------------|
| Structure          |                                                                     |                                                                     |                                                                     |
| Actual Endpoint    | Non-Carcinogen                                                      | Non-Carcinogen                                                      | Non-Carcinogen                                                      |
| Predicted Endpoint | Non-Carcinogen                                                      | Non-Carcinogen                                                      | Non-Carcinogen                                                      |
| Similarity         | 0.333                                                               | 0.286                                                               | 0.272                                                               |
| Reference          | US FDA (Centre for Drug Eval.& Res./Off. Testing & Res.) Sept. 1997 | US FDA (Centre for Drug Eval.& Res./Off. Testing & Res.) Sept. 1997 | US FDA (Centre for Drug Eval.& Res./Off. Testing & Res.) Sept. 1997 |

## Model Applicability

Missing features are fingerprint features in the query molecule not found in the training set.

1. Missing Feature: SCFP\_12 1930718785 [\*]C[NH+](C[\*])C[\*]
2. Missing Feature: SCFP\_12 -1396915742 [\*]CC[NH+]([\*])[\*]
3. Missing Feature: SCFP\_12 -1396885951 [\*][NH+]([\*])CC=[\*]

## Feature Contribution

| Top features for Carcinogen |            |                  |       |                            |
|-----------------------------|------------|------------------|-------|----------------------------|
| Fingerprint                 | Bit        | Structure/Smiles | Score | Carcinogen in training set |
| SCFP_12                     | 1651620003 |                  | 0.657 | 7 out of 10                |

| SCFP_12                         | 1962031760  |    | 0.610  | 2 out of 2                 |
|---------------------------------|-------------|---------------------------------------------------------------------------------------|--------|----------------------------|
| SCFP_12                         | -1379673609 |    | 0.541  | 11 out of 19               |
| Top Features for Non-Carcinogen |             |                                                                                       |        |                            |
| Fingerprint                     | Bit         | Structure/Smiles                                                                      | Score  | Carcinogen in training set |
| SCFP_12                         | -1849236245 |    | -0.815 | 0 out of 4                 |
| SCFP_12                         | -1343150366 |  | -0.644 | 3 out of 21                |
| SCFP_12                         | 1653911926  |  | -0.487 | 12 out of 64               |



$C_{25}H_{28}ClN_5O_2$

Molecular Weight: 465.97512

ALogP: 3.413

Rotatable Bonds: 4

Acceptors: 3

Donors: 2

## Model Prediction

Prediction: Non-Carcinogen

Probability: 0.252

Enrichment: 0.754

Bayesian Score: -3.348

Prediction: Positive if the Bayesian score is above the estimated best cutoff value.

Probability: The estimated probability that the sample is in the category.

Enrichment: An estimate of enrichment, that is, the increased likelihood (versus random) of this sample being in the category.

Bayesian Score: The standard Laplacian-modified Bayesian score.

## Structural Similar Compounds

| Name               | Temazepam                                                           | Doxefazepam                                                         | Amoxapine                                                           |
|--------------------|---------------------------------------------------------------------|---------------------------------------------------------------------|---------------------------------------------------------------------|
| Structure          |                                                                     |                                                                     |                                                                     |
| Actual Endpoint    | Non-Carcinogen                                                      | Carcinogen                                                          | Carcinogen                                                          |
| Predicted Endpoint | Non-Carcinogen                                                      | Carcinogen                                                          | Carcinogen                                                          |
| Similarity         | 0.339                                                               | 0.338                                                               | 0.333                                                               |
| Reference          | US FDA (Centre for Drug Eval.& Res./Off. Testing & Res.) Sept. 1997 | US FDA (Centre for Drug Eval.& Res./Off. Testing & Res.) Sept. 1997 | US FDA (Centre for Drug Eval.& Res./Off. Testing & Res.) Sept. 1997 |

## Model Applicability

Missing features are fingerprint features in the query molecule not found in the training set.

1. All descriptors are in range.

## Feature Contribution

### Top features for Carcinogen

| Fingerprint | Bit        | Structure/Smiles | Score | Carcinogen in training set |
|-------------|------------|------------------|-------|----------------------------|
| SCFP_12     | 1651620003 |                  | 0.657 | 7 out of 10                |

| SCFP_12                         | 1962031760  | 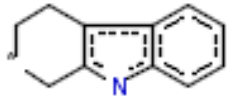   | 0.610  | 2 out of 2                 |
|---------------------------------|-------------|---------------------------------------------------------------------------------------|--------|----------------------------|
| SCFP_12                         | -1379673609 |    | 0.541  | 11 out of 19               |
| Top Features for Non-Carcinogen |             |                                                                                       |        |                            |
| Fingerprint                     | Bit         | Structure/Smiles                                                                      | Score  | Carcinogen in training set |
| SCFP_12                         | -1849236245 |    | -0.815 | 0 out of 4                 |
| SCFP_12                         | 52043406    |  | -0.665 | 0 out of 3                 |
| SCFP_12                         | -1343150366 |  | -0.644 | 3 out of 21                |

## MOST ACTIVE.mol



$C_{25}H_{28}FN_2O$

Molecular Weight: 391.50102

ALogP: 3.098

Rotatable Bonds: 5

Acceptors: 1

Donors: 2

## Model Prediction

**Prediction: Carcinogen**

Probability: 0.356

Enrichment: 1.064

Bayesian Score: 3.163

Prediction: Positive if the Bayesian score is above the estimated best cutoff value.

Probability: The estimated probability that the sample is in the category.

Enrichment: An estimate of enrichment, that is, the increased likelihood (versus random) of this sample being in the category.

Bayesian Score: The standard Laplacian-modified Bayesian score.

## TOPKAT\_Rat\_Male\_FDA\_None\_vs\_Carcinogen

### Structural Similar Compounds

| Name               | Bupropion                                                           | Chlorpropamide                                                      | Phenobarbital                                                       |
|--------------------|---------------------------------------------------------------------|---------------------------------------------------------------------|---------------------------------------------------------------------|
| Structure          |                                                                     |                                                                     |                                                                     |
| Actual Endpoint    | Non-Carcinogen                                                      | Non-Carcinogen                                                      | Carcinogen                                                          |
| Predicted Endpoint | Non-Carcinogen                                                      | Non-Carcinogen                                                      | Carcinogen                                                          |
| Similarity         | 0.362                                                               | 0.327                                                               | 0.311                                                               |
| Reference          | US FDA (Centre for Drug Eval.& Res./Off. Testing & Res.) Sept. 1997 | US FDA (Centre for Drug Eval.& Res./Off. Testing & Res.) Sept. 1997 | US FDA (Centre for Drug Eval.& Res./Off. Testing & Res.) Sept. 1997 |

### Model Applicability

Missing features are fingerprint features in the query molecule not found in the training set.

1. Missing Feature: SCFP\_12 1930718785 [\*]C[NH+](C[\*])C[\*]
2. Missing Feature: SCFP\_12 -1396915742 [\*]CC[NH+](C[\*])C[\*]
3. Missing Feature: SCFP\_12 -1688664082 [\*][NH+](C[\*])C@H](C)[c]([\*]):[\*]

### Feature Contribution

| Top features for Carcinogen |            |                  |       |                            |
|-----------------------------|------------|------------------|-------|----------------------------|
| Fingerprint                 | Bit        | Structure/Smiles | Score | Carcinogen in training set |
| SCFP_12                     | 1651620003 |                  | 0.657 | 7 out of 10                |

| SCFP_12                         | -1379673609 | 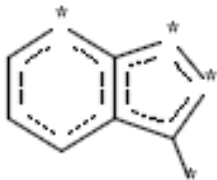   | 0.541  | 11 out of 19               |
|---------------------------------|-------------|---------------------------------------------------------------------------------------|--------|----------------------------|
| SCFP_12                         | 2098257782  |    | 0.433  | 2 out of 3                 |
| Top Features for Non-Carcinogen |             |                                                                                       |        |                            |
| Fingerprint                     | Bit         | Structure/Smiles                                                                      | Score  | Carcinogen in training set |
| SCFP_12                         | 11          |    | -0.274 | 0 out of 1                 |
| SCFP_12                         | -971326317  |  | -0.274 | 0 out of 1                 |
| SCFP_12                         | -587479743  |  | -0.274 | 0 out of 1                 |



$C_{23}H_{26}N_4O_2$

Molecular Weight: 390.47814

ALogP: 2.702

Rotatable Bonds: 5

Acceptors: 2

Donors: 2

## Model Prediction

Prediction: Single-Carcinogen

Probability: 0.513

Enrichment: 1.240

Bayesian Score: -2.039

Prediction: Positive if the Bayesian score is above the estimated best cutoff value.

Probability: The estimated probability that the sample is in the category.

Enrichment: An estimate of enrichment, that is, the increased likelihood (versus random) of this sample being in the category.

Bayesian Score: The standard Laplacian-modified Bayesian score.

## Structural Similar Compounds

| Name               | Deserpidine                                                         | Reserpine                                                           | Prilocaine                                                          |
|--------------------|---------------------------------------------------------------------|---------------------------------------------------------------------|---------------------------------------------------------------------|
| Structure          |                                                                     |                                                                     |                                                                     |
| Actual Endpoint    | Single-Carcinogen                                                   | Multiple-Carcinogen                                                 | Multiple-Carcinogen                                                 |
| Predicted Endpoint | Multiple-Carcinogen                                                 | Multiple-Carcinogen                                                 | Multiple-Carcinogen                                                 |
| Similarity         | 0.304                                                               | 0.264                                                               | 0.255                                                               |
| Reference          | US FDA (Centre for Drug Eval.& Res./Off. Testing & Res.) Sept. 1997 | US FDA (Centre for Drug Eval.& Res./Off. Testing & Res.) Sept. 1997 | US FDA (Centre for Drug Eval.& Res./Off. Testing & Res.) Sept. 1997 |

## Model Applicability

Missing features are fingerprint features in the query molecule not found in the training set.

- Missing Feature: SCFP\_8 -587479743 [\*]N[\*]C[c](:[\*]):[\*]

## Feature Contribution

### Top features for Multiple-Carcinogen

| Fingerprint | Bit        | Structure/Smiles | Score | Multiple-Carcinogen in training set |
|-------------|------------|------------------|-------|-------------------------------------|
| SCFP_8      | -111024397 |                  | 0.345 | 4 out of 7                          |



|        |            |                                                                                     |       |              |
|--------|------------|-------------------------------------------------------------------------------------|-------|--------------|
| SCFP_8 | 1256786467 | 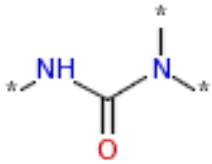 | 0.340 | 5 out of 9   |
| SCFP_8 | 1256995004 |  | 0.331 | 10 out of 19 |

### Top Features for Single-Carcinogen

| Fingerprint | Bit         | Structure/Smiles                                                                      | Score  | Multiple-Carcinogen in training set |
|-------------|-------------|---------------------------------------------------------------------------------------|--------|-------------------------------------|
| SCFP_8      | 1653911926  | 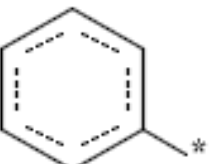   | -0.985 | 1 out of 12                         |
| SCFP_8      | -1381862798 |  | -0.572 | 1 out of 7                          |
| SCFP_8      | 1655199790  |  | -0.342 | 1 out of 5                          |





$C_{28}H_{34}N_5O_2$

Molecular Weight: 472.60186

ALogP: 1.567

Rotatable Bonds: 6

Acceptors: 2

Donors: 3

## Model Prediction

Prediction: Single-Carcinogen

Probability: 0.514

Enrichment: 1.241

Bayesian Score: -1.983

Prediction: Positive if the Bayesian score is above the estimated best cutoff value.

Probability: The estimated probability that the sample is in the category.

Enrichment: An estimate of enrichment, that is, the increased likelihood (versus random) of this sample being in the category.

Bayesian Score: The standard Laplacian-modified Bayesian score.

## Structural Similar Compounds

| Name               | Deserpidine                                                         | Reserpine                                                           | Prilocaine                                                          |
|--------------------|---------------------------------------------------------------------|---------------------------------------------------------------------|---------------------------------------------------------------------|
| Structure          |                                                                     |                                                                     |                                                                     |
| Actual Endpoint    | Single-Carcinogen                                                   | Multiple-Carcinogen                                                 | Multiple-Carcinogen                                                 |
| Predicted Endpoint | Multiple-Carcinogen                                                 | Multiple-Carcinogen                                                 | Multiple-Carcinogen                                                 |
| Similarity         | 0.266                                                               | 0.232                                                               | 0.215                                                               |
| Reference          | US FDA (Centre for Drug Eval.& Res./Off. Testing & Res.) Sept. 1997 | US FDA (Centre for Drug Eval.& Res./Off. Testing & Res.) Sept. 1997 | US FDA (Centre for Drug Eval.& Res./Off. Testing & Res.) Sept. 1997 |

## Model Applicability

Missing features are fingerprint features in the query molecule not found in the training set.

1. Missing Feature: SCFP\_8 11 [\*][NH+]([\*])[\*]
2. Missing Feature: SCFP\_8 -587479743 [\*]N([\*])C[c](:[\*]):[\*]
3. Missing Feature: SCFP\_8 1930718785 [\*]C[NH+](C[\*])C[\*]
4. Missing Feature: SCFP\_8 -1396915742 [\*]CC[NH+]([\*])[\*]
5. Missing Feature: SCFP\_8 -1396885951 [\*][NH+]([\*])CC=[\*]

## Feature Contribution

| Top features for Multiple-Carcinogen |             |                  |       |                                     |
|--------------------------------------|-------------|------------------|-------|-------------------------------------|
| Fingerprint                          | Bit         | Structure/Smiles | Score | Multiple-Carcinogen in training set |
| SCFP_8                               | -1971137145 |                  | 0.351 | 3 out of 5                          |

|        |            |                                                                                     |       |            |
|--------|------------|-------------------------------------------------------------------------------------|-------|------------|
| SCFP_8 | -111024397 | 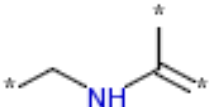 | 0.345 | 4 out of 7 |
| SCFP_8 | 1256786467 |  | 0.340 | 5 out of 9 |

### Top Features for Single-Carcinogen

| Fingerprint | Bit         | Structure/Smiles                                                                      | Score  | Multiple-Carcinogen in training set |
|-------------|-------------|---------------------------------------------------------------------------------------|--------|-------------------------------------|
| SCFP_8      | 1653911926  |    | -0.985 | 1 out of 12                         |
| SCFP_8      | -1381862798 |  | -0.572 | 1 out of 7                          |
| SCFP_8      | 1655199790  |  | -0.342 | 1 out of 5                          |



## MOST ACTIVE.mol



C<sub>25</sub>H<sub>28</sub>FN<sub>2</sub>O

Molecular Weight: 391.50102

ALogP: 3.098

Rotatable Bonds: 5

Acceptors: 1

Donors: 2

## Model Prediction

**Prediction: Multiple-Carcinogen**

Probability: 0.531

Enrichment: 1.282

Bayesian Score: 0.663

Prediction: Positive if the Bayesian score is above the estimated best cutoff value.

Probability: The estimated probability that the sample is in the category.

Enrichment: An estimate of enrichment, that is, the increased likelihood (versus random) of this sample being in the category.

Bayesian Score: The standard Laplacian-modified Bayesian score.

## TOPKAT\_Rat\_Male\_FDA\_Single\_vs\_Multiple

### Structural Similar Compounds

| Name               | Phenobarbital                                                       | Sertraline                                                          | Oxazepam                                                            |
|--------------------|---------------------------------------------------------------------|---------------------------------------------------------------------|---------------------------------------------------------------------|
| Structure          |                                                                     |                                                                     |                                                                     |
| Actual Endpoint    | Single-Carcinogen                                                   | Single-Carcinogen                                                   | Single-Carcinogen                                                   |
| Predicted Endpoint | Single-Carcinogen                                                   | Single-Carcinogen                                                   | Single-Carcinogen                                                   |
| Similarity         | 0.311                                                               | 0.306                                                               | 0.296                                                               |
| Reference          | US FDA (Centre for Drug Eval.& Res./Off. Testing & Res.) Sept. 1997 | US FDA (Centre for Drug Eval.& Res./Off. Testing & Res.) Sept. 1997 | US FDA (Centre for Drug Eval.& Res./Off. Testing & Res.) Sept. 1997 |

### Model Applicability

Missing features are fingerprint features in the query molecule not found in the training set.

1. Missing Feature: SCFP\_8 11 [\*][NH+]([\*])[\*]
2. Missing Feature: SCFP\_8 1930718785 [\*]C[NH+](C[\*])C[\*]
3. Missing Feature: SCFP\_8 -1396915742 [\*]CC[NH+]([\*])[\*]
4. Missing Feature: SCFP\_8 -1688664082 [\*][NH+]([\*])[C@H](C)[c]([\*]):[\*]
5. Missing Feature: SCFP\_8 -587479743 [\*]N[\*]C[c]([\*]):[\*]

### Feature Contribution

| Top features for Multiple-Carcinogen |             |                  |       |                                     |
|--------------------------------------|-------------|------------------|-------|-------------------------------------|
| Fingerprint                          | Bit         | Structure/Smiles | Score | Multiple-Carcinogen in training set |
| SCFP_8                               | -1633424324 |                  | 0.383 | 1 out of 1                          |

| SCFP_8                             | -168480298  | 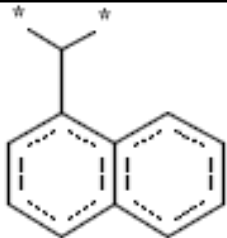    | 0.383  | 1 out of 1                          |
|------------------------------------|-------------|---------------------------------------------------------------------------------------|--------|-------------------------------------|
| SCFP_8                             | 2094857464  |    | 0.383  | 1 out of 1                          |
| Top Features for Single-Carcinogen |             |                                                                                       |        |                                     |
| Fingerprint                        | Bit         | Structure/Smiles                                                                      | Score  | Multiple-Carcinogen in training set |
| SCFP_8                             | -730654023  |    | -0.463 | 1 out of 6                          |
| SCFP_8                             | -1794884847 |  | -0.463 | 1 out of 6                          |
| SCFP_8                             | -1381307546 |  | -0.463 | 1 out of 6                          |







$C_{28}H_{34}N_4O_2$

Molecular Weight: 472.60186

ALogP: 1.567

Rotatable Bonds: 6

Acceptors: 2

Donors: 3

## Model Prediction

Prediction: Mild

Probability: 0.041

Enrichment: 0.112

Bayesian Score: -13.395

Prediction: Positive if the Bayesian score is above the estimated best cutoff value.

Probability: The estimated probability that the sample is in the category.

Enrichment: An estimate of enrichment, that is, the increased likelihood (versus random) of this sample being in the category.

Bayesian Score: The standard Laplacian-modified Bayesian score.

## Structural Similar Compounds

| Name               | Isoquinoline, 1,2,3,4-tetrahydro-2-octanoyl-                                                                                                                                    | Cinnamic acid, phenethyl ester                                                                                                                  | Cinnamyl alcohol, propionate                                                                                                                    |
|--------------------|---------------------------------------------------------------------------------------------------------------------------------------------------------------------------------|-------------------------------------------------------------------------------------------------------------------------------------------------|-------------------------------------------------------------------------------------------------------------------------------------------------|
| Structure          |                                                                                                                                                                                 |                                                                                                                                                 |                                                                                                                                                 |
| Actual Endpoint    | Moderate_Severe                                                                                                                                                                 | Mild                                                                                                                                            | Mild                                                                                                                                            |
| Predicted Endpoint | Moderate_Severe                                                                                                                                                                 | Mild                                                                                                                                            | Mild                                                                                                                                            |
| Similarity         | 0.283                                                                                                                                                                           | 0.281                                                                                                                                           | 0.259                                                                                                                                           |
| Reference          | NTIS** National Technical Information Service. (Springfield, VA 22161) Formerly U.S. Clearinghouse for Scientific & Technical Information. Volume(issue)/page/year: AD-A042-527 | FCTXAV Food and Cosmetics Toxicology. (London, UK) V.1-19, 1963-81. For publisher information, see FCTOD7. Volume(issue)/page/year: 16,845,1978 | FCTXAV Food and Cosmetics Toxicology. (London, UK) V.1-19, 1963-81. For publisher information, see FCTOD7. Volume(issue)/page/year: 12,859,1974 |

## Model Applicability

Missing features are fingerprint features in the query molecule not found in the training set.

1. Missing Feature: FCFP\_10 10 [\*][NH+]([\*])[\*]
2. Missing Feature: FCFP\_10 203707511 [\*]C[c]1:n:[\*]:[\*]:[c]:1[\*]
3. Missing Feature: FCFP\_10 -1853714334 [\*]C[NH+](C[\*])C[\*]
4. Missing Feature: FCFP\_10 1155241219 [\*]CC[NH+]([\*])[\*]

## Feature Contribution

### Top features for Moderate\_Severe

| Fingerprint | Bit | Structure/Smiles | Score | Moderate_Severe in training set |
|-------------|-----|------------------|-------|---------------------------------|
|             |     |                  |       |                                 |

| FCFP_10               | 206055935  | 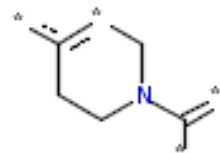   | 0.385  | 1 out of 1                         |
|-----------------------|------------|---------------------------------------------------------------------------------------|--------|------------------------------------|
| FCFP_10               | 451847724  |    | 0.255  | 101 out of 216                     |
| FCFP_10               | 907007053  |    | 0.243  | 27 out of 58                       |
| Top Features for Mild |            |                                                                                       |        |                                    |
| Fingerprint           | Bit        | Structure/Smiles                                                                      | Score  | Moderate_Severe<br>in training set |
| FCFP_10               | -885550502 |  | -1.052 | 2 out of 21                        |
| FCFP_10               | 307419094  |  | -0.917 | 2 out of 18                        |
|                       |            |                                                                                       |        |                                    |

|         |             |                                                                                     |        |             |
|---------|-------------|-------------------------------------------------------------------------------------|--------|-------------|
| FCFP_10 | -1320007763 | 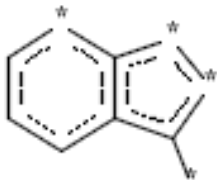 | -0.761 | 2 out of 15 |
|---------|-------------|-------------------------------------------------------------------------------------|--------|-------------|



$C_{24}H_{27}NO_7$

Molecular Weight: 441.47368

ALogP: 3.388

Rotatable Bonds: 9

Acceptors: 7

Donors: 1

## Model Prediction

Prediction: Non-Irritant

Probability: 0.963

Enrichment: 1.046

Bayesian Score: -1.257

Prediction: Positive if the Bayesian score is above the estimated best cutoff value.

Probability: The estimated probability that the sample is in the category.

Enrichment: An estimate of enrichment, that is, the increased likelihood (versus random) of this sample being in the category.

Bayesian Score: The standard Laplacian-modified Bayesian score.

## Structural Similar Compounds

| Name               | Phenol, 4-allyl-2-methoxy-, acetate                                                                                                             | Acetic acid, phenyl-, 4-allyl-2-methoxyphenyl ester                                                                                             | 2-Propanone, 1-(p-methoxyphenyl)-                                                                                                               |
|--------------------|-------------------------------------------------------------------------------------------------------------------------------------------------|-------------------------------------------------------------------------------------------------------------------------------------------------|-------------------------------------------------------------------------------------------------------------------------------------------------|
| Structure          |                                                                                                                                                 |                                                                                                                                                 |                                                                                                                                                 |
| Actual Endpoint    | Irritant                                                                                                                                        | Irritant                                                                                                                                        | Irritant                                                                                                                                        |
| Predicted Endpoint | Irritant                                                                                                                                        | Irritant                                                                                                                                        | Non-Irritant                                                                                                                                    |
| Similarity         | 0.463                                                                                                                                           | 0.419                                                                                                                                           | 0.410                                                                                                                                           |
| Reference          | FCTXAV Food and Cosmetics Toxicology. (London, UK) V.1-19, 1963-81. For publisher information, see FCTOD7. Volume(issue)/page/year: 12,877,1974 | FCTXAV Food and Cosmetics Toxicology. (London, UK) V.1-19, 1963-81. For publisher information, see FCTOD7. Volume(issue)/page/year: 16,753,1978 | FCTXAV Food and Cosmetics Toxicology. (London, UK) V.1-19, 1963-81. For publisher information, see FCTOD7. Volume(issue)/page/year: 17,857,1979 |

## Model Applicability

Missing features are fingerprint features in the query molecule not found in the training set.

1. All descriptors are in range.

## Feature Contribution

| Top features for Irritant |             |                  |       |                          |
|---------------------------|-------------|------------------|-------|--------------------------|
| Fingerprint               | Bit         | Structure/Smiles | Score | Irritant in training set |
| FCFP_12                   | -1979033238 |                  | 0.084 | 19 out of 19             |

| FCFP_12                       | 436886043   | 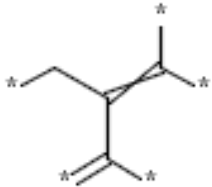   | 0.080  | 129 out of 130           |
|-------------------------------|-------------|---------------------------------------------------------------------------------------|--------|--------------------------|
| FCFP_12                       | -1038421835 |    | 0.079  | 9 out of 9               |
| Top Features for Non-Irritant |             |                                                                                       |        |                          |
| Fingerprint                   | Bit         | Structure/Smiles                                                                      | Score  | Irritant in training set |
| FCFP_12                       | -2002900105 |    | -0.650 | 0 out of 1               |
| FCFP_12                       | 566058135   |  | -0.367 | 13 out of 21             |
| FCFP_12                       | -547731249  |  | -0.222 | 2 out of 3               |



$C_{25}H_{29}N_3O_4$

Molecular Weight: 435.51546

ALogP: 2.831

Rotatable Bonds: 8

Acceptors: 4

Donors: 2

## Model Prediction

Prediction: Non-Irritant

Probability: 0.952

Enrichment: 1.033

Bayesian Score: -1.727

Prediction: Positive if the Bayesian score is above the estimated best cutoff value.

Probability: The estimated probability that the sample is in the category.

Enrichment: An estimate of enrichment, that is, the increased likelihood (versus random) of this sample being in the category.

Bayesian Score: The standard Laplacian-modified Bayesian score.

## Structural Similar Compounds

| Name               | Isoquinoline, 1,2,3,4-tetrahydro-2-octanoyl-                                                                                                                                    | Acetic acid, phenyl-, 4-allyl-2-methoxyphenyl ester                                                                                             | Acetic acid, phenyl-, p-methoxybenzyl ester                                                                                                     |
|--------------------|---------------------------------------------------------------------------------------------------------------------------------------------------------------------------------|-------------------------------------------------------------------------------------------------------------------------------------------------|-------------------------------------------------------------------------------------------------------------------------------------------------|
| Structure          |                                                                                                                                                                                 |                                                                                                                                                 |                                                                                                                                                 |
| Actual Endpoint    | Irritant                                                                                                                                                                        | Irritant                                                                                                                                        | Irritant                                                                                                                                        |
| Predicted Endpoint | Irritant                                                                                                                                                                        | Irritant                                                                                                                                        | Irritant                                                                                                                                        |
| Similarity         | 0.358                                                                                                                                                                           | 0.333                                                                                                                                           | 0.321                                                                                                                                           |
| Reference          | NTIS** National Technical Information Service. (Springfield, VA 22161) Formerly U.S. Clearinghouse for Scientific & Technical Information. Volume(issue)/page/year: AD-A042-527 | FCTXAV Food and Cosmetics Toxicology. (London, UK) V.1-19, 1963-81. For publisher information, see FCTOD7. Volume(issue)/page/year: 16,753,1978 | FCTXAV Food and Cosmetics Toxicology. (London, UK) V.1-19, 1963-81. For publisher information, see FCTOD7. Volume(issue)/page/year: 18,651,1980 |

## Model Applicability

Missing features are fingerprint features in the query molecule not found in the training set.

- Missing Feature: FCFP\_12 203707511 [\*]C[c]1:n:[\*]:[\*]:[c]:1[\*]

## Feature Contribution

### Top features for Irritant

| Fingerprint | Bit | Structure/Smiles | Score | Irritant in training set |
|-------------|-----|------------------|-------|--------------------------|
|             |     |                  |       |                          |

| FCFP_12                       | -1038421835 | 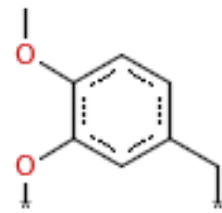   | 0.079  | 9 out of 9               |
|-------------------------------|-------------|---------------------------------------------------------------------------------------|--------|--------------------------|
| FCFP_12                       | 1985089045  |    | 0.078  | 8 out of 8               |
| FCFP_12                       | -917072037  |    | 0.073  | 5 out of 5               |
| Top Features for Non-Irritant |             |                                                                                       |        |                          |
| Fingerprint                   | Bit         | Structure/Smiles                                                                      | Score  | Irritant in training set |
| FCFP_12                       | -2002900105 |  | -0.650 | 0 out of 1               |
| FCFP_12                       | 566058135   |  | -0.367 | 13 out of 21             |

|         |            |                                                                                     |        |            |
|---------|------------|-------------------------------------------------------------------------------------|--------|------------|
| FCFP_12 | -357825883 | 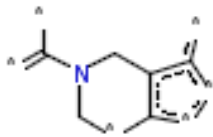 | -0.347 | 1 out of 2 |
|---------|------------|-------------------------------------------------------------------------------------|--------|------------|





$C_{29}H_{24}FNO_5$

Molecular Weight: 485.50296

ALogP: 5.695

Rotatable Bonds: 7

Acceptors: 4

Donors: 2

## Model Prediction

Prediction: Non-Irritant

Probability: 0.891

Enrichment: 0.967

Bayesian Score: -2.818

Prediction: Positive if the Bayesian score is above the estimated best cutoff value.

Probability: The estimated probability that the sample is in the category.

Enrichment: An estimate of enrichment, that is, the increased likelihood (versus random) of this sample being in the category.

Bayesian Score: The standard Laplacian-modified Bayesian score.

## Structural Similar Compounds

| Name               | 2-Butanone, 4-(4-hydroxy-3-methoxyphenyl)-                                                                                                                     | Phenol, 2-methoxy-4-propyl-                                                                                                                                    | Acetic acid, 2-chloro-5-nitrophenyl ester |
|--------------------|----------------------------------------------------------------------------------------------------------------------------------------------------------------|----------------------------------------------------------------------------------------------------------------------------------------------------------------|-------------------------------------------|
| Structure          |                                                                                                                                                                |                                                                                                                                                                |                                           |
| Actual Endpoint    | Irritant                                                                                                                                                       | Irritant                                                                                                                                                       | Irritant                                  |
| Predicted Endpoint | Irritant                                                                                                                                                       | Irritant                                                                                                                                                       | Non-Irritant                              |
| Similarity         | 0.274                                                                                                                                                          | 0.267                                                                                                                                                          | 0.262                                     |
| Reference          | FCTOD7 Food and Chemical Toxicology. (Pergamon Press Inc., Maxwell House, Fairview Park, Elmsford, NY 10523) V.20- 1982- Volume(issue)/page/year: 20,851 ,1982 | FCTOD7 Food and Chemical Toxicology. (Pergamon Press Inc., Maxwell House, Fairview Park, Elmsford, NY 10523) V.20- 1982- Volume(issue)/page/year: 20,671 ,1982 | 28ZPAK -,92,72                            |

## Model Applicability

Missing features are fingerprint features in the query molecule not found in the training set.

1. All descriptors are in range.

## Feature Contribution

| Top features for Irritant |             |                  |       |                          |
|---------------------------|-------------|------------------|-------|--------------------------|
| Fingerprint               | Bit         | Structure/Smiles | Score | Irritant in training set |
| FCFP_12                   | -2083883923 |                  | 0.087 | 51 out of 51             |

| FCFP_12                       | -1979033238 | 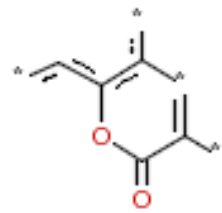   | 0.084  | 19 out of 19             |
|-------------------------------|-------------|---------------------------------------------------------------------------------------|--------|--------------------------|
| FCFP_12                       | -124655670  |    | 0.082  | 13 out of 13             |
| Top Features for Non-Irritant |             |                                                                                       |        |                          |
| Fingerprint                   | Bit         | Structure/Smiles                                                                      | Score  | Irritant in training set |
| FCFP_12                       | -2002900105 |    | -0.650 | 0 out of 1               |
| FCFP_12                       | 566058135   |  | -0.367 | 13 out of 21             |
| FCFP_12                       | -547731249  |  | -0.222 | 2 out of 3               |



$C_{22}H_{22}N_4O_3$

Molecular Weight: 390.43508

ALogP: 1.807

Rotatable Bonds: 6

Acceptors: 3

Donors: 4

## Model Prediction

Prediction: Non-Irritant

Probability: 0.457

Enrichment: 0.496

Bayesian Score: -4.734

Prediction: Positive if the Bayesian score is above the estimated best cutoff value.

Probability: The estimated probability that the sample is in the category.

Enrichment: An estimate of enrichment, that is, the increased likelihood (versus random) of this sample being in the category.

Bayesian Score: The standard Laplacian-modified Bayesian score.

## Structural Similar Compounds

| Name               | Glutamic acid, N-(p-(methylamino)benzoyl)-, sodium salt                                                                                                         | Acetanilide, 4'-(2-hydroxyethylsulfonyl)- | 8-Methylamino-4-hydroxy-2-naphthalene sulfonic acid |
|--------------------|-----------------------------------------------------------------------------------------------------------------------------------------------------------------|-------------------------------------------|-----------------------------------------------------|
| Structure          |                                                                                                                                                                 |                                           |                                                     |
| Actual Endpoint    | Irritant                                                                                                                                                        | Non-Irritant                              | Non-Irritant                                        |
| Predicted Endpoint | Non-Irritant                                                                                                                                                    | Non-Irritant                              | Non-Irritant                                        |
| Similarity         | 0.316                                                                                                                                                           | 0.288                                     | 0.273                                               |
| Reference          | FCTOD7 Food and Chemical Toxicology. (Pergamon Press Inc., Maxwell House, Fa irview Park, Elmsford, NY 10523) V.20- 1982- Volume(issue)/page/year: 20,563 ,1982 | 28ZPAK -,533,72                           | 28ZPAK -,190,72                                     |

## Model Applicability

Missing features are fingerprint features in the query molecule not found in the training set.

- Missing Feature: FCFP\_12 1618184456 [\*][c]1:[\*]:[\*]:n:c:1

## Feature Contribution

| Top features for Irritant |             |                  |       |                          |
|---------------------------|-------------|------------------|-------|--------------------------|
| Fingerprint               | Bit         | Structure/Smiles | Score | Irritant in training set |
| FCFP_12                   | -1549103449 |                  | 0.073 | 5 out of 5               |

| FCFP_12                       | 307448885   | 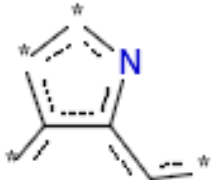   | 0.066  | 3 out of 3               |
|-------------------------------|-------------|---------------------------------------------------------------------------------------|--------|--------------------------|
| FCFP_12                       | 2005402822  |    | 0.066  | 3 out of 3               |
| Top Features for Non-Irritant |             |                                                                                       |        |                          |
| Fingerprint                   | Bit         | Structure/Smiles                                                                      | Score  | Irritant in training set |
| FCFP_12                       | 1175665944  |    | -1.020 | 2 out of 8               |
| FCFP_12                       | -2002900105 |  | -0.650 | 0 out of 1               |
| FCFP_12                       | 1294255210  |  | -0.486 | 12 out of 22             |



$C_{19}H_{23}N_3O_4S$

Molecular Weight: 389.46862

ALogP: 1.461

Rotatable Bonds: 7

Acceptors: 5

Donors: 1

## Model Prediction

Prediction: Non-Irritant

Probability: 0.969

Enrichment: 1.052

Bayesian Score: -0.907

Prediction: Positive if the Bayesian score is above the estimated best cutoff value.

Probability: The estimated probability that the sample is in the category.

Enrichment: An estimate of enrichment, that is, the increased likelihood (versus random) of this sample being in the category.

Bayesian Score: The standard Laplacian-modified Bayesian score.

## Structural Similar Compounds

| Name               | Phenol, 4-allyl-2-methoxy-, acetate                                                                                                             | Isoquinoline, 1,2,3,4-tetrahydro-2-octanoyl-                                                                                                                                    | Acetic acid, phenyl-, 4-allyl-2-methoxyphenyl ester                                                                                             |
|--------------------|-------------------------------------------------------------------------------------------------------------------------------------------------|---------------------------------------------------------------------------------------------------------------------------------------------------------------------------------|-------------------------------------------------------------------------------------------------------------------------------------------------|
| Structure          |                                                                                                                                                 |                                                                                                                                                                                 |                                                                                                                                                 |
| Actual Endpoint    | Irritant                                                                                                                                        | Irritant                                                                                                                                                                        | Irritant                                                                                                                                        |
| Predicted Endpoint | Irritant                                                                                                                                        | Irritant                                                                                                                                                                        | Irritant                                                                                                                                        |
| Similarity         | 0.347                                                                                                                                           | 0.340                                                                                                                                                                           | 0.340                                                                                                                                           |
| Reference          | FCTXAV Food and Cosmetics Toxicology. (London, UK) V.1-19, 1963-81. For publisher information, see FCTOD7. Volume(issue)/page/year: 12,877,1974 | NTIS** National Technical Information Service. (Springfield, VA 22161) Formerly U.S. Clearinghouse for Scientific & Technical Information. Volume(issue)/page/year: AD-A042-527 | FCTXAV Food and Cosmetics Toxicology. (London, UK) V.1-19, 1963-81. For publisher information, see FCTOD7. Volume(issue)/page/year: 16,753,1978 |

## Model Applicability

Missing features are fingerprint features in the query molecule not found in the training set.

1. All descriptors are in range.

## Feature Contribution

### Top features for Irritant

| Fingerprint | Bit | Structure/Smiles | Score | Irritant in training set |
|-------------|-----|------------------|-------|--------------------------|
|             |     |                  |       |                          |

| FCFP_12                       | -124655670  | 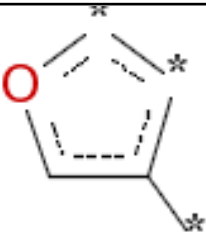    | 0.082  | 13 out of 13             |
|-------------------------------|-------------|---------------------------------------------------------------------------------------|--------|--------------------------|
| FCFP_12                       | 262046847   |    | 0.082  | 13 out of 13             |
| FCFP_12                       | -1539132615 |    | 0.079  | 9 out of 9               |
| Top Features for Non-Irritant |             |                                                                                       |        |                          |
| Fingerprint                   | Bit         | Structure/Smiles                                                                      | Score  | Irritant in training set |
| FCFP_12                       | 1294255210  |  | -0.486 | 12 out of 22             |
| FCFP_12                       | 566058135   |  | -0.367 | 13 out of 21             |

|         |             |                                                                                                                                                                                                                                                                                                                                                                                                                                                                                                                                                                        |        |            |
|---------|-------------|------------------------------------------------------------------------------------------------------------------------------------------------------------------------------------------------------------------------------------------------------------------------------------------------------------------------------------------------------------------------------------------------------------------------------------------------------------------------------------------------------------------------------------------------------------------------|--------|------------|
| FCFP_12 | -1151914249 | 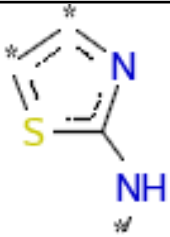 <p>The image shows the chemical structure of 2-thiazolethione, a five-membered aromatic heterocycle. It consists of a ring with a sulfur atom (S) at the bottom-left position and a nitrogen atom (N) at the top-right position. A double bond is located between the sulfur and the carbon atom to its right. The nitrogen atom is bonded to a hydrogen atom (H). There are two asterisks (*) in the structure: one above the top carbon atom and one below the nitrogen atom.</p> | -0.109 | 4 out of 5 |
|---------|-------------|------------------------------------------------------------------------------------------------------------------------------------------------------------------------------------------------------------------------------------------------------------------------------------------------------------------------------------------------------------------------------------------------------------------------------------------------------------------------------------------------------------------------------------------------------------------------|--------|------------|



$C_{23}H_{26}N_2O_6$

Molecular Weight: 426.46234

ALogP: 1.967

Rotatable Bonds: 7

Acceptors: 6

Donors: 1

## Model Prediction

Prediction: Non-Irritant

Probability: 0.001

Enrichment: 0.001

Bayesian Score: -8.229

Prediction: Positive if the Bayesian score is above the estimated best cutoff value.

Probability: The estimated probability that the sample is in the category.

Enrichment: An estimate of enrichment, that is, the increased likelihood (versus random) of this sample being in the category.

Bayesian Score: The standard Laplacian-modified Bayesian score.

## Structural Similar Compounds

| Name               | p-Acetophenetidine, 3'-(bis(2-hydroxyethyl)amino)- | p-Acetophenetidine, 3'-nitro- | Acetanilide, 3'-amino-4'-ethoxy- |
|--------------------|----------------------------------------------------|-------------------------------|----------------------------------|
| Structure          |                                                    |                               |                                  |
| Actual Endpoint    | Non-Irritant                                       | Non-Irritant                  | Non-Irritant                     |
| Predicted Endpoint | Non-Irritant                                       | Non-Irritant                  | Non-Irritant                     |
| Similarity         | 0.444                                              | 0.409                         | 0.395                            |
| Reference          | 28ZPAK -,100,72                                    | 28ZPAK -,115,72               | 28ZPAK -,115,72                  |

## Model Applicability

Missing features are fingerprint features in the query molecule not found in the training set.

1. All descriptors are in range.

## Feature Contribution

| Top features for Irritant |           |                  |       |                          |
|---------------------------|-----------|------------------|-------|--------------------------|
| Fingerprint               | Bit       | Structure/Smiles | Score | Irritant in training set |
| FCFP_12                   | 262046847 |                  | 0.082 | 13 out of 13             |



| FCFP_12                       | -1038421835 | 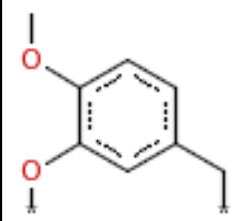   | 0.079  | 9 out of 9               |
|-------------------------------|-------------|---------------------------------------------------------------------------------------|--------|--------------------------|
| FCFP_12                       | 1985089045  |    | 0.078  | 8 out of 8               |
| Top Features for Non-Irritant |             |                                                                                       |        |                          |
| Fingerprint                   | Bit         | Structure/Smiles                                                                      | Score  | Irritant in training set |
| FCFP_12                       | -789307649  |    | -1.539 | 0 out of 4               |
| FCFP_12                       | 1175665944  |   | -1.020 | 2 out of 8               |
| FCFP_12                       | -1838187238 |  | -0.692 | 5 out of 12              |



$C_{24}H_{27}N_5O_4$

Molecular Weight: 449.50228

ALogP: 1.731

Rotatable Bonds: 9

Acceptors: 6

Donors: 1

## Model Prediction

Prediction: Non-Irritant

Probability: 0.648

Enrichment: 0.704

Bayesian Score: -4.154

Prediction: Positive if the Bayesian score is above the estimated best cutoff value.

Probability: The estimated probability that the sample is in the category.

Enrichment: An estimate of enrichment, that is, the increased likelihood (versus random) of this sample being in the category.

Bayesian Score: The standard Laplacian-modified Bayesian score.

## Structural Similar Compounds

| Name               | Phenol, 4-allyl-2-methoxy-, acetate                                                                                                             | Benzenesulfonamide, 4-amino-N-(5,6-dimethoxy-4-pyrimidinyl)- | p-Acetophenetidine, 3'-(bis(2-hydroxyethyl)amino)- |
|--------------------|-------------------------------------------------------------------------------------------------------------------------------------------------|--------------------------------------------------------------|----------------------------------------------------|
| Structure          |                                                                                                                                                 |                                                              |                                                    |
| Actual Endpoint    | Irritant                                                                                                                                        | Irritant                                                     | Non-Irritant                                       |
| Predicted Endpoint | Irritant                                                                                                                                        | Non-Irritant                                                 | Non-Irritant                                       |
| Similarity         | 0.321                                                                                                                                           | 0.317                                                        | 0.316                                              |
| Reference          | FCTXAV Food and Cosmetics Toxicology. (London, UK) V.1-19, 1963-81. For publisher information, see FCTOD7. Volume(issue)/page/year: 12,877,1974 | FCTXAV 14,307,76                                             | 28ZPAK -,100,72                                    |

## Model Applicability

Missing features are fingerprint features in the query molecule not found in the training set.

- Missing Feature: FCFP\_12 906560188 [\*]:[c](:[\*])Cn(:[\*]):[\*]

## Feature Contribution

| Top features for Irritant |           |                  |       |                          |
|---------------------------|-----------|------------------|-------|--------------------------|
| Fingerprint               | Bit       | Structure/Smiles | Score | Irritant in training set |
| FCFP_12                   | 262046847 |                  | 0.082 | 13 out of 13             |

| FCFP_12                       | -1038421835 | 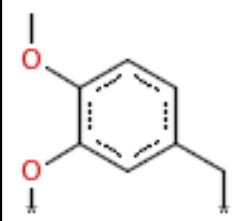   | 0.079  | 9 out of 9               |
|-------------------------------|-------------|---------------------------------------------------------------------------------------|--------|--------------------------|
| FCFP_12                       | 1985089045  |    | 0.078  | 8 out of 8               |
| Top Features for Non-Irritant |             |                                                                                       |        |                          |
| Fingerprint                   | Bit         | Structure/Smiles                                                                      | Score  | Irritant in training set |
| FCFP_12                       | 1175665944  |    | -1.020 | 2 out of 8               |
| FCFP_12                       | -1838187238 |   | -0.692 | 5 out of 12              |
| FCFP_12                       | -451043714  |  | -0.650 | 0 out of 1               |



$C_{22}H_{24}N_2O_4$

Molecular Weight: 380.43696

ALogP: 3.001

Rotatable Bonds: 8

Acceptors: 4

Donors: 1

## Model Prediction

Prediction: Non-Irritant

Probability: 0.954

Enrichment: 1.036

Bayesian Score: -1.641

Prediction: Positive if the Bayesian score is above the estimated best cutoff value.

Probability: The estimated probability that the sample is in the category.

Enrichment: An estimate of enrichment, that is, the increased likelihood (versus random) of this sample being in the category.

Bayesian Score: The standard Laplacian-modified Bayesian score.

## Structural Similar Compounds

| Name               | Acetophenone, 4'-methoxy-                                                                                                                       | Phenol, 4-allyl-2-methoxy-, acetate                                                                                                             | Acetic acid, phenyl-, 4-allyl-2-methoxyphenyl ester                                                                                             |
|--------------------|-------------------------------------------------------------------------------------------------------------------------------------------------|-------------------------------------------------------------------------------------------------------------------------------------------------|-------------------------------------------------------------------------------------------------------------------------------------------------|
| Structure          |                                                                                                                                                 |                                                                                                                                                 |                                                                                                                                                 |
| Actual Endpoint    | Irritant                                                                                                                                        | Irritant                                                                                                                                        | Irritant                                                                                                                                        |
| Predicted Endpoint | Irritant                                                                                                                                        | Irritant                                                                                                                                        | Irritant                                                                                                                                        |
| Similarity         | 0.381                                                                                                                                           | 0.354                                                                                                                                           | 0.347                                                                                                                                           |
| Reference          | FCTXAV Food and Cosmetics Toxicology. (London, UK) V.1-19, 1963-81. For publisher information, see FCTOD7. Volume(issue)/page/year: 12,927,1974 | FCTXAV Food and Cosmetics Toxicology. (London, UK) V.1-19, 1963-81. For publisher information, see FCTOD7. Volume(issue)/page/year: 12,877,1974 | FCTXAV Food and Cosmetics Toxicology. (London, UK) V.1-19, 1963-81. For publisher information, see FCTOD7. Volume(issue)/page/year: 16,753,1978 |

## Model Applicability

Missing features are fingerprint features in the query molecule not found in the training set.

1. All descriptors are in range.

## Feature Contribution

| Top features for Irritant |            |                  |       |                          |
|---------------------------|------------|------------------|-------|--------------------------|
| Fingerprint               | Bit        | Structure/Smiles | Score | Irritant in training set |
| FCFP_12                   | -124655670 |                  | 0.082 | 13 out of 13             |

| FCFP_12                       | -1038421835 | 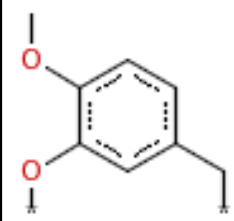   | 0.079  | 9 out of 9               |
|-------------------------------|-------------|---------------------------------------------------------------------------------------|--------|--------------------------|
| FCFP_12                       | 1985089045  |    | 0.078  | 8 out of 8               |
| Top Features for Non-Irritant |             |                                                                                       |        |                          |
| Fingerprint                   | Bit         | Structure/Smiles                                                                      | Score  | Irritant in training set |
| FCFP_12                       | -2002900105 |    | -0.650 | 0 out of 1               |
| FCFP_12                       | 566058135   |  | -0.367 | 13 out of 21             |
| FCFP_12                       | -547731249  |  | -0.222 | 2 out of 3               |



$C_{23}H_{26}N_4O_2$

Molecular Weight: 390.47814

ALogP: 2.702

Rotatable Bonds: 5

Acceptors: 2

Donors: 2

## Model Prediction

Prediction: Non-Irritant

Probability: 0.957

Enrichment: 1.039

Bayesian Score: -1.535

Prediction: Positive if the Bayesian score is above the estimated best cutoff value.

Probability: The estimated probability that the sample is in the category.

Enrichment: An estimate of enrichment, that is, the increased likelihood (versus random) of this sample being in the category.

Bayesian Score: The standard Laplacian-modified Bayesian score.

## Structural Similar Compounds

| Name               | Isoquinoline, 1,2,3,4-tetrahydro-2-octanoyl-                                                                                                                                                | N-Benzyl-N-acetyl-o-methyl cyclohexylamine | Methyl 2-hydroxy-4-phenyl butyrate |
|--------------------|---------------------------------------------------------------------------------------------------------------------------------------------------------------------------------------------|--------------------------------------------|------------------------------------|
| Structure          |                                                                                                                                                                                             |                                            |                                    |
| Actual Endpoint    | Irritant                                                                                                                                                                                    | Non-Irritant                               | Non-Irritant                       |
| Predicted Endpoint | Irritant                                                                                                                                                                                    | Non-Irritant                               | Non-Irritant                       |
| Similarity         | 0.367                                                                                                                                                                                       | 0.294                                      | 0.292                              |
| Reference          | NTIS** National Technical Information Service.<br>(Springfield, VA 22161)<br>Formerly U.S. Clearinghouse for Scientific & Technical Information.<br>Volume(issue)/page/year:<br>AD-A042-527 | US ARMY                                    | US ARMY                            |

## Model Applicability

Missing features are fingerprint features in the query molecule not found in the training set.

- Missing Feature: FCFP\_12 203707511 [\*]C[c]1:n:[\*]:[\*]:[c]:1[\*]

## Feature Contribution

| Top features for Irritant |            |                  |       |                          |
|---------------------------|------------|------------------|-------|--------------------------|
| Fingerprint               | Bit        | Structure/Smiles | Score | Irritant in training set |
| FCFP_12                   | 2005402822 |                  | 0.066 | 3 out of 3               |

| FCFP_12                       | 19          | 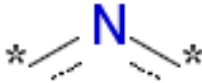   | 0.066  | 3 out of 3               |
|-------------------------------|-------------|---------------------------------------------------------------------------------------|--------|--------------------------|
| FCFP_12                       | 307448885   |    | 0.066  | 3 out of 3               |
| Top Features for Non-Irritant |             |                                                                                       |        |                          |
| Fingerprint                   | Bit         | Structure/Smiles                                                                      | Score  | Irritant in training set |
| FCFP_12                       | 1910745113  |    | -0.650 | 0 out of 1               |
| FCFP_12                       | -357825883  |  | -0.347 | 1 out of 2               |
| FCFP_12                       | -1320007763 |  | -0.089 | 20 out of 24             |



$C_{28}H_{34}N_4O_2$

Molecular Weight: 472.60186

ALogP: 1.567

Rotatable Bonds: 6

Acceptors: 2

Donors: 3

## Model Prediction

Prediction: Irritant

Probability: 0.977

Enrichment: 1.061

Bayesian Score: -0.071

Prediction: Positive if the Bayesian score is above the estimated best cutoff value.

Probability: The estimated probability that the sample is in the category.

Enrichment: An estimate of enrichment, that is, the increased likelihood (versus random) of this sample being in the category.

Bayesian Score: The standard Laplacian-modified Bayesian score.

## Structural Similar Compounds

| Name               | Isoquinoline, 1,2,3,4-tetrahydro-2-octanoyl-                                                                                                                                    | Cinnamic acid, phenethyl ester                                                                                                                  | Cinnamyl alcohol, propionate                                                                                                                    |
|--------------------|---------------------------------------------------------------------------------------------------------------------------------------------------------------------------------|-------------------------------------------------------------------------------------------------------------------------------------------------|-------------------------------------------------------------------------------------------------------------------------------------------------|
| Structure          |                                                                                                                                                                                 |                                                                                                                                                 |                                                                                                                                                 |
| Actual Endpoint    | Irritant                                                                                                                                                                        | Irritant                                                                                                                                        | Irritant                                                                                                                                        |
| Predicted Endpoint | Irritant                                                                                                                                                                        | Irritant                                                                                                                                        | Irritant                                                                                                                                        |
| Similarity         | 0.283                                                                                                                                                                           | 0.281                                                                                                                                           | 0.259                                                                                                                                           |
| Reference          | NTIS** National Technical Information Service. (Springfield, VA 22161) Formerly U.S. Clearinghouse for Scientific & Technical Information. Volume(issue)/page/year: AD-A042-527 | FCTXAV Food and Cosmetics Toxicology. (London, UK) V.1-19, 1963-81. For publisher information, see FCTOD7. Volume(issue)/page/year: 16,845,1978 | FCTXAV Food and Cosmetics Toxicology. (London, UK) V.1-19, 1963-81. For publisher information, see FCTOD7. Volume(issue)/page/year: 12,859,1974 |

## Model Applicability

Missing features are fingerprint features in the query molecule not found in the training set.

1. Missing Feature: FCFP\_12 203707511 [\*]C[c]1:n:[\*]:[\*]:[c]:1[\*]
2. Missing Feature: FCFP\_12 -1853714334 [\*]C[NH+](C[\*])C[\*]
3. Missing Feature: FCFP\_12 1155241219 [\*]CC[NH+]([\*])[\*]

## Feature Contribution

### Top features for Irritant

| Fingerprint | Bit | Structure/Smiles | Score | Irritant in training set |
|-------------|-----|------------------|-------|--------------------------|
|             |     |                  |       |                          |



| FCFP_12                       | -146015125  | 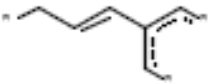   | 0.085  | 24 out of 24             |
|-------------------------------|-------------|---------------------------------------------------------------------------------------|--------|--------------------------|
| FCFP_12                       | 2011169140  |    | 0.083  | 15 out of 15             |
| FCFP_12                       | 451847724   |    | 0.074  | 270 out of 274           |
| Top Features for Non-Irritant |             |                                                                                       |        |                          |
| Fingerprint                   | Bit         | Structure/Smiles                                                                      | Score  | Irritant in training set |
| FCFP_12                       | -1320007763 |  | -0.089 | 20 out of 24             |
| FCFP_12                       | 1618154665  |  | -0.084 | 412 out of 490           |
|                               |             |                                                                                       |        |                          |

FCFP\_12

16

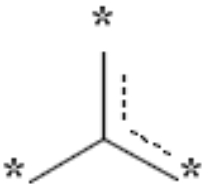

-0.084

423 out of 503

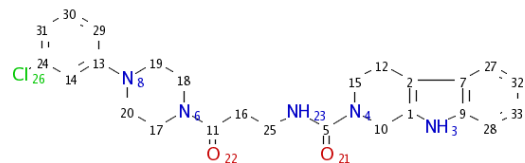

$C_{25}H_{28}ClN_5O_2$

Molecular Weight: 465.97512

ALogP: 3.413

Rotatable Bonds: 4

Acceptors: 3

Donors: 2

## Model Prediction

Prediction: Non-Irritant

Probability: 0.962

Enrichment: 1.044

Bayesian Score: -1.329

Prediction: Positive if the Bayesian score is above the estimated best cutoff value.

Probability: The estimated probability that the sample is in the category.

Enrichment: An estimate of enrichment, that is, the increased likelihood (versus random) of this sample being in the category.

Bayesian Score: The standard Laplacian-modified Bayesian score.

## Structural Similar Compounds

| Name               | Maleimide, N-(p-chlorophenyl)-                                                                                                   | C.I. Fluorescent Brightening Agent 24                                                                     | Piperazine, 1-phenyl-                                                                                                                             |
|--------------------|----------------------------------------------------------------------------------------------------------------------------------|-----------------------------------------------------------------------------------------------------------|---------------------------------------------------------------------------------------------------------------------------------------------------|
| Structure          |                                                                                                                                  |                                                                                                           |                                                                                                                                                   |
| Actual Endpoint    | Irritant                                                                                                                         | Irritant                                                                                                  | Irritant                                                                                                                                          |
| Predicted Endpoint | Non-Irritant                                                                                                                     | Non-Irritant                                                                                              | Irritant                                                                                                                                          |
| Similarity         | 0.296                                                                                                                            | 0.281                                                                                                     | 0.278                                                                                                                                             |
| Reference          | SCCUR* Shell Chemical Company. Unpublished Report. (2401 Crow Canyon Rd., San Romon, CA 94583) Volume(issue)/page/year: -,7,1961 | MVCRB3 MVC-Report. (Stockholm, Sweden) No.1-2, 1972-73. Discontinued. Volume(issue)/page/year: 2,193,1973 | 85JCAE "Prehled Prumyslove Toxikologie; Organické Latky," Marhold, J., Prague, Czechoslovakia, Avicenum, 1986 Volume(issue)/page/year: -,868,1986 |

## Model Applicability

Missing features are fingerprint features in the query molecule not found in the training set.

- Missing Feature: FCFP\_12 203707511 [\*]C[c]1:n:[\*]:[\*]:[c]:1[\*]

## Feature Contribution

| Top features for Irritant |            |                  |       |                          |
|---------------------------|------------|------------------|-------|--------------------------|
| Fingerprint               | Bit        | Structure/Smiles | Score | Irritant in training set |
| FCFP_12                   | 1604677718 |                  | 0.078 | 8 out of 8               |

| FCFP_12                       | -1428172766 | 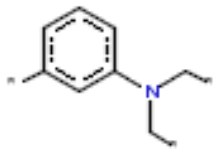   | 0.077  | 7 out of 7               |
|-------------------------------|-------------|---------------------------------------------------------------------------------------|--------|--------------------------|
| FCFP_12                       | 19          |    | 0.066  | 3 out of 3               |
| Top Features for Non-Irritant |             |                                                                                       |        |                          |
| Fingerprint                   | Bit         | Structure/Smiles                                                                      | Score  | Irritant in training set |
| FCFP_12                       | 2134556787  |    | -0.347 | 1 out of 2               |
| FCFP_12                       | 367998008   |  | -0.129 | 61 out of 76             |
| FCFP_12                       | 71476542    |  | -0.120 | 64 out of 79             |

## MOST ACTIVE.mol

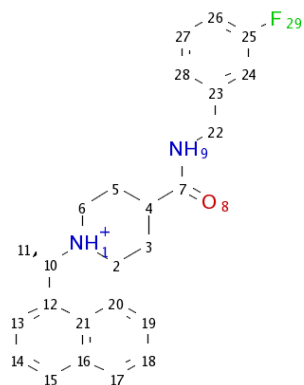

$C_{25}H_{28}FN_2O$

Molecular Weight: 391.50102

ALogP: 3.098

Rotatable Bonds: 5

Acceptors: 1

Donors: 2

### Model Prediction

Prediction: Non-Irritant

Probability: 0.913

Enrichment: 0.991

Bayesian Score: -2.543

Prediction: Positive if the Bayesian score is above the estimated best cutoff value.

Probability: The estimated probability that the sample is in the category.

Enrichment: An estimate of enrichment, that is, the increased likelihood (versus random) of this sample being in the category.

Bayesian Score: The standard Laplacian-modified Bayesian score.

## TOPKAT\_Skin\_Irritancy\_None\_vs\_Irritant

### Structural Similar Compounds

| Name               | 1'-Acetonaphthone                                                                                                                                              | Sulfone, p-chlorophenyl methyl                                                                                                                                                  | Sulfoxide, p-chlorophenyl methyl |
|--------------------|----------------------------------------------------------------------------------------------------------------------------------------------------------------|---------------------------------------------------------------------------------------------------------------------------------------------------------------------------------|----------------------------------|
| Structure          |                                                                                                                                                                |                                                                                                                                                                                 |                                  |
| Actual Endpoint    | Irritant                                                                                                                                                       | Irritant                                                                                                                                                                        | Irritant                         |
| Predicted Endpoint | Non-Irritant                                                                                                                                                   | Non-Irritant                                                                                                                                                                    | Non-Irritant                     |
| Similarity         | 0.310                                                                                                                                                          | 0.310                                                                                                                                                                           | 0.310                            |
| Reference          | FCTOD7 Food and Chemical Toxicology. (Pergamon Press Inc., Maxwell House, Fairview Park, Elmsford, NY 10523) V.20- 1982- Volume(issue)/page/year: 20,755 ,1982 | NTIS** National Technical Information Service. (Springfield, VA 22161) Formerly U.S. Clearinghouse for Scientific & Technical Information. Volume(issue)/page/year: AD-A082-824 | NTIS** AD-A082-824               |

### Model Applicability

Missing features are fingerprint features in the query molecule not found in the training set.

1. Missing Feature: FCFP\_12 -1853714334 [\*]C[NH+](C[\*])C[\*]
2. Missing Feature: FCFP\_12 1155241219 [\*]CC[NH+](C[\*])C[\*]
3. Missing Feature: FCFP\_12 -680623486 [\*][NH+](C[\*])[C@H](C)[c]([\*]):[\*]

### Feature Contribution

#### Top features for Irritant

| Fingerprint | Bit | Structure/Smiles | Score | Irritant in training set |
|-------------|-----|------------------|-------|--------------------------|
|             |     |                  |       |                          |

| FCFP_12                       | 907096426   | 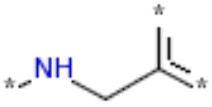   | 0.077  | 7 out of 7               |
|-------------------------------|-------------|---------------------------------------------------------------------------------------|--------|--------------------------|
| FCFP_12                       | 427906732   |    | 0.076  | 6 out of 6               |
| FCFP_12                       | 1390854130  |    | 0.058  | 2 out of 2               |
| Top Features for Non-Irritant |             |                                                                                       |        |                          |
| Fingerprint                   | Bit         | Structure/Smiles                                                                      | Score  | Irritant in training set |
| FCFP_12                       | -1700637232 |  | -0.846 | 1 out of 4               |
| FCFP_12                       | 566058135   |  | -0.367 | 13 out of 21             |
|                               |             |                                                                                       |        |                          |

|         |           |                                                                                    |        |            |
|---------|-----------|------------------------------------------------------------------------------------|--------|------------|
| FCFP_12 | 460148824 | 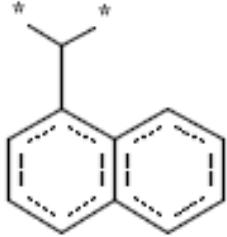 | -0.222 | 2 out of 3 |
|---------|-----------|------------------------------------------------------------------------------------|--------|------------|

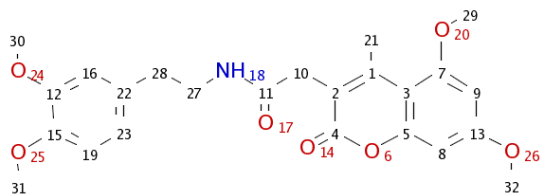

$C_{24}H_{27}NO_7$

Molecular Weight: 441.47368

ALogP: 3.388

Rotatable Bonds: 9

Acceptors: 7

Donors: 1

### Model Prediction

Prediction: 120.939

Unit: mg/kg\_body\_weight/day

### Model Applicability

Missing features are fingerprint features in the query molecule not found in the training set.

1. All properties and OPS components are within expected ranges.



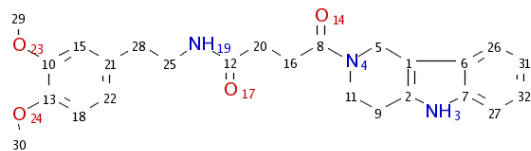

$C_{25}H_{29}N_3O_4$

Molecular Weight: 435.51546

ALogP: 2.831

Rotatable Bonds: 8

Acceptors: 4

Donors: 2

### Model Prediction

Prediction: 35.731

Unit: mg/kg\_body\_weight/day

### Model Applicability

Missing features are fingerprint features in the query molecule not found in the training set.

1. OPS PC26 out of range. Value: -3.5465. Training min, max, SD, explained variance: -3.2331, 3.4098, 1.011, 0.0124.



C<sub>29</sub>H<sub>24</sub>FNO<sub>5</sub>

Molecular Weight: 485.50296

ALogP: 5.695

Rotatable Bonds: 7

Acceptors: 4

Donors: 2

### Model Prediction

Prediction: 11.423

Unit: mg/kg\_body\_weight/day

### Model Applicability

Missing features are fingerprint features in the query molecule not found in the training set.

1. All properties and OPS components are within expected ranges.



C<sub>22</sub>H<sub>22</sub>N<sub>4</sub>O<sub>3</sub>

Molecular Weight: 390.43508

ALogP: 1.807

Rotatable Bonds: 6

Acceptors: 3

Donors: 4

### Model Applicability

Missing features are fingerprint features in the query molecule not found in the training set.

1. All properties and OPS components are within expected ranges.

### Model Prediction

Prediction: 14.541

Unit: mg/kg\_body\_weight/day



C<sub>19</sub>H<sub>23</sub>N<sub>3</sub>O<sub>4</sub>S

Molecular Weight: 389.46862

ALogP: 1.461

Rotatable Bonds: 7

Acceptors: 5

Donors: 1

### Model Applicability

Missing features are fingerprint features in the query molecule not found in the training set.

1. OPS PC17 out of range. Value: 3.8215. Training min, max, SD, explained variance: -3.0124, 3.3948, 1.24, 0.0187.

### Model Prediction

Prediction: 123.376

Unit: mg/kg\_body\_weight/day

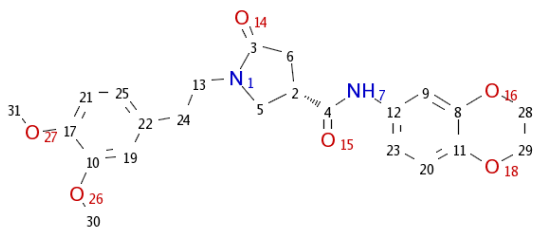

C<sub>23</sub>H<sub>26</sub>N<sub>2</sub>O<sub>6</sub>

Molecular Weight: 426.46234

ALogP: 1.967

Rotatable Bonds: 7

Acceptors: 6

Donors: 1

### Model Prediction

Prediction: 49.533

Unit: mg/kg\_body\_weight/day

### Model Applicability

Missing features are fingerprint features in the query molecule not found in the training set.

1. All properties and OPS components are within expected ranges.

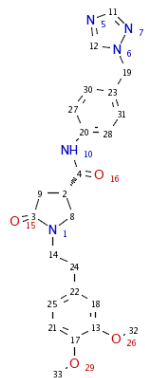

$C_{24}H_{27}N_5O_4$

Molecular Weight: 449.50228

ALogP: 1.731

Rotatable Bonds: 9

Acceptors: 6

Donors: 1

### Model Applicability

Missing features are fingerprint features in the query molecule not found in the training set.

- OPS PC17 out of range. Value: 3.4025. Training min, max, SD, explained variance: -3.0124, 3.3948, 1.24, 0.0187.  
Unknown FCFP\_2 feature: 906560188: [\*]:[c](:[\*])Cn(:[\*]):[\*]

### Model Prediction

Prediction: 52.595

Unit: mg/kg\_body\_weight/day



$C_{22}H_{24}N_2O_4$

Molecular Weight: 380.43696

ALogP: 3.001

Rotatable Bonds: 8

Acceptors: 4

Donors: 1

### Model Prediction

Prediction: 174.770

Unit: mg/kg\_body\_weight/day

### Model Applicability

Missing features are fingerprint features in the query molecule not found in the training set.

1. All properties and OPS components are within expected ranges.



$C_{23}H_{26}N_4O_2$

Molecular Weight: 390.47814

ALogP: 2.702

Rotatable Bonds: 5

Acceptors: 2

Donors: 2

### Model Prediction

Prediction: 3.760

Unit: mg/kg\_body\_weight/day

### Model Applicability

Missing features are fingerprint features in the query molecule not found in the training set.

1. All properties and OPS components are within expected ranges.



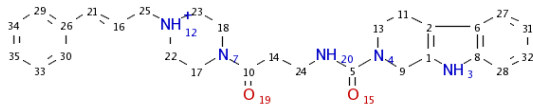

$C_{28}H_{34}N_5O_2$

Molecular Weight: 472.60186

ALogP: 1.567

Rotatable Bonds: 6

Acceptors: 2

Donors: 3

### Model Prediction

Prediction: 3.296

Unit: mg/kg\_body\_weight/day

### Model Applicability

Missing features are fingerprint features in the query molecule not found in the training set.

1. All properties and OPS components are within expected ranges.

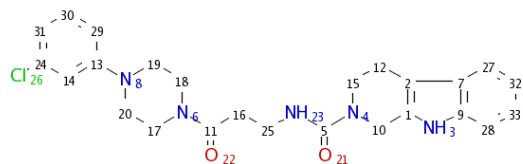

$C_{25}H_{28}ClN_5O_2$

Molecular Weight: 465.97512

ALogP: 3.413

Rotatable Bonds: 4

Acceptors: 3

Donors: 2

### Model Applicability

Missing features are fingerprint features in the query molecule not found in the training set.

1. OPS PC23 out of range. Value: 3.0294. Training min, max, SD, explained variance: -2.8229, 2.9945, 1.071, 0.0140.  
OPS PC26 out of range. Value: -3.9141. Training min, max, SD, explained variance: -3.2331, 3.4098, 1.011, 0.0124.

### Model Prediction

Prediction: 6.786

Unit: mg/kg\_body\_weight/day

## MOST ACTIVE.mol

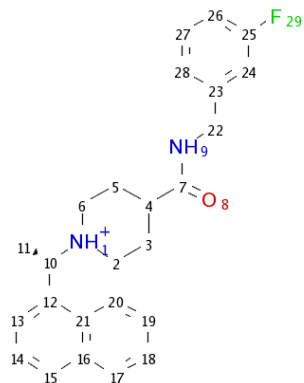

C<sub>25</sub>H<sub>28</sub>FN<sub>2</sub>O

Molecular Weight: 391.50102

ALogP: 3.098

Rotatable Bonds: 5

Acceptors: 1

Donors: 2

## Model Prediction

Prediction: 9.368

Unit: mg/kg\_body\_weight/day

## TOPKAT\_Carcinogenic\_Potency\_TD50\_Mouse

### Model Applicability

Missing features are fingerprint features in the query molecule not found in the training set.

1. All properties and OPS components are within expected ranges.  
Unknown FCFP\_2 feature: -680623486: [\*][NH+]([\*])[C@H](C)[c]([\*]):[\*]:[\*]

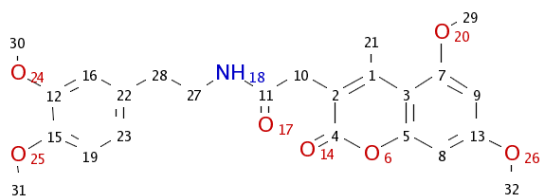

C<sub>24</sub>H<sub>27</sub>NO<sub>7</sub>

Molecular Weight: 441.47368

ALogP: 3.388

Rotatable Bonds: 9

Acceptors: 7

Donors: 1

### Model Prediction

Prediction: 5.578

Unit: mg/kg\_body\_weight/day

### Model Applicability

Missing features are fingerprint features in the query molecule not found in the training set.

1. All properties and OPS components are within expected ranges.



$C_{25}H_{29}N_3O_4$

Molecular Weight: 435.51546

ALogP: 2.831

Rotatable Bonds: 8

Acceptors: 4

Donors: 2

### Model Prediction

Prediction: 1.199

Unit: mg/kg\_body\_weight/day

### Model Applicability

Missing features are fingerprint features in the query molecule not found in the training set.

1. OPS PC11 out of range. Value: 6.1833. Training min, max, SD, explained variance: -6.3567, 5.7241, 1.635, 0.0252.



$C_{29}H_{24}FNO_5$

Molecular Weight: 485.50296

ALogP: 5.695

Rotatable Bonds: 7

Acceptors: 4

Donors: 2

### Model Prediction

Prediction: 5.324

Unit: mg/kg\_body\_weight/day

### Model Applicability

Missing features are fingerprint features in the query molecule not found in the training set.

1. All properties and OPS components are within expected ranges.



C<sub>22</sub>H<sub>22</sub>N<sub>4</sub>O<sub>3</sub>

Molecular Weight: 390.43508

ALogP: 1.807

Rotatable Bonds: 6

Acceptors: 3

Donors: 4

### Model Prediction

Prediction: 0.827

Unit: mg/kg\_body\_weight/day

### Model Applicability

Missing features are fingerprint features in the query molecule not found in the training set.

1. All properties and OPS components are within expected ranges.

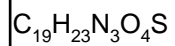

ALogP: 1.461

Rotatable Bonds: 7

Acceptors: 5

Donors: 1

Prediction: 10.310

Unit: mg/kg\_body\_weight/day

Missing features are fingerprint features in the query molecule not found in the training set.

1. All properties and OPS components are within expected ranges.





$C_{23}H_{26}N_2O_6$

Molecular Weight: 426.46234

ALogP: 1.967

Rotatable Bonds: 7

Acceptors: 6

Donors: 1

### Model Prediction

Prediction: 1.163

Unit: mg/kg\_body\_weight/day

### Model Applicability

Missing features are fingerprint features in the query molecule not found in the training set.

1. All properties and OPS components are within expected ranges.



$C_{24}H_{27}N_5O_4$

Molecular Weight: 449.50228

ALogP: 1.731

Rotatable Bonds: 9

Acceptors: 6

Donors: 1

### Model Applicability

Missing features are fingerprint features in the query molecule not found in the training set.

1. All properties and OPS components are within expected ranges.  
Unknown FCFP\_2 feature: 906560188: [\*]:[c](:[\*])Cn(:[\*]):[\*]

### Model Prediction

Prediction: 1.861

Unit: mg/kg\_body\_weight/day



$C_{22}H_{24}N_2O_4$

Molecular Weight: 380.43696

ALogP: 3.001

Rotatable Bonds: 8

Acceptors: 4

Donors: 1

### Model Applicability

Missing features are fingerprint features in the query molecule not found in the training set.

1. OPS PC11 out of range. Value: 5.9062. Training min, max, SD, explained variance: -6.3567, 5.7241, 1.635, 0.0252.  
OPS PC17 out of range. Value: 5.2117. Training min, max, SD, explained variance: -3.7756, 5.087, 1.368, 0.0176.

### Model Prediction

Prediction: 14.544

Unit: mg/kg\_body\_weight/day



$C_{23}H_{26}N_4O_2$

Molecular Weight: 390.47814

ALogP: 2.702

Rotatable Bonds: 5

Acceptors: 2

Donors: 2

### Model Prediction

Prediction: 0.325

Unit: mg/kg\_body\_weight/day

### Model Applicability

Missing features are fingerprint features in the query molecule not found in the training set.

1. All properties and OPS components are within expected ranges.



$C_{28}H_{34}N_5O_2$

Molecular Weight: 472.60186

ALogP: 1.567

Rotatable Bonds: 6

Acceptors: 2

Donors: 3

### Model Prediction

Prediction: 1.726

Unit: mg/kg\_body\_weight/day

### Model Applicability

Missing features are fingerprint features in the query molecule not found in the training set.

1. All properties and OPS components are within expected ranges.



$C_{25}H_{28}ClN_5O_2$

Molecular Weight: 465.97512

ALogP: 3.413

Rotatable Bonds: 4

Acceptors: 3

Donors: 2

### Model Prediction

Prediction: 0.315

Unit: mg/kg\_body\_weight/day

### Model Applicability

Missing features are fingerprint features in the query molecule not found in the training set.

1. OPS PC11 out of range. Value: 6.7001. Training min, max, SD, explained variance: -6.3567, 5.7241, 1.635, 0.0252.  
OPS PC25 out of range. Value: 4.3169. Training min, max, SD, explained variance: -3.9292, 4.0882, 1.064, 0.0107.

## MOST ACTIVE.mol



C<sub>25</sub>H<sub>28</sub>FN<sub>2</sub>O

Molecular Weight: 391.50102

ALogP: 3.098

Rotatable Bonds: 5

Acceptors: 1

Donors: 2

## Model Prediction

Prediction: 2.548

Unit: mg/kg\_body\_weight/day

## TOPKAT\_Carcinogenic\_Potency\_TD50\_Rat

### Model Applicability

Missing features are fingerprint features in the query molecule not found in the training set.

1. All properties and OPS components are within expected ranges.  
Unknown FCFP\_2 feature: -680623486: [\*][NH+]([\*])[C@H](C)[c](:[\*]):[\*]



$C_{24}H_{27}NO_7$

Molecular Weight: 441.47368

ALogP: 3.388

Rotatable Bonds: 9

Acceptors: 7

Donors: 1

### Model Prediction

Prediction: 0.040

Unit: g/kg\_body\_weight

### Model Applicability

Missing features are fingerprint features in the query molecule not found in the training set.

1. All properties and OPS components are within expected ranges.



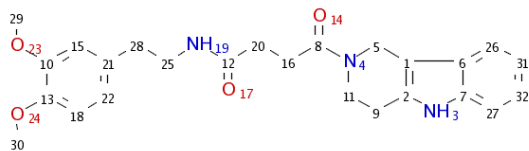

$C_{25}H_{29}N_3O_4$

Molecular Weight: 435.51546

ALogP: 2.831

Rotatable Bonds: 8

Acceptors: 4

Donors: 2

### Model Prediction

Prediction: 0.540

Unit: g/kg\_body\_weight

### Model Applicability

Missing features are fingerprint features in the query molecule not found in the training set.

1. All properties and OPS components are within expected ranges.

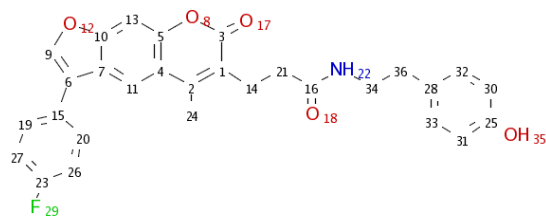

$C_{29}H_{24}FNO_5$

Molecular Weight: 485.50296

ALogP: 5.695

Rotatable Bonds: 7

Acceptors: 4

Donors: 2

### Model Prediction

Prediction: 0.044

Unit: g/kg\_body\_weight

### Model Applicability

Missing features are fingerprint features in the query molecule not found in the training set.

1. All properties and OPS components are within expected ranges.



C<sub>22</sub>H<sub>22</sub>N<sub>4</sub>O<sub>3</sub>

Molecular Weight: 390.43508

ALogP: 1.807

Rotatable Bonds: 6

Acceptors: 3

Donors: 4

### Model Applicability

Missing features are fingerprint features in the query molecule not found in the training set.

1. All properties and OPS components are within expected ranges.

### Model Prediction

Prediction: 0.233

Unit: g/kg\_body\_weight

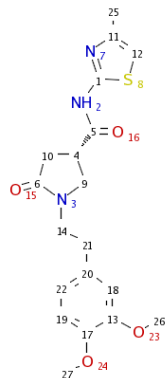

$C_{19}H_{23}N_3O_4S$

Molecular Weight: 389.46862

ALogP: 1.461

Rotatable Bonds: 7

Acceptors: 5

Donors: 1

### Model Prediction

Prediction: 0.340

Unit: g/kg\_body\_weight

### Model Applicability

Missing features are fingerprint features in the query molecule not found in the training set.

1. OPS PC33 out of range. Value: -4.7489. Training min, max, SD, explained variance: -4.34, 3.6146, 1.305, 0.0065.



$C_{23}H_{26}N_2O_6$

Molecular Weight: 426.46234

ALogP: 1.967

Rotatable Bonds: 7

Acceptors: 6

Donors: 1

### Model Prediction

Prediction: 0.446

Unit: g/kg\_body\_weight

### Model Applicability

Missing features are fingerprint features in the query molecule not found in the training set.

1. OPS PC33 out of range. Value: -4.7216. Training min, max, SD, explained variance: -4.34, 3.6146, 1.305, 0.0065.



$C_{24}H_{27}N_5O_4$

Molecular Weight: 449.50228

ALogP: 1.731

Rotatable Bonds: 9

Acceptors: 6

Donors: 1

### Model Prediction

Prediction: 0.151

Unit: g/kg\_body\_weight

### Model Applicability

Missing features are fingerprint features in the query molecule not found in the training set.

- OPS PC33 out of range. Value: -5.3637. Training min, max, SD, explained variance: -4.34, 3.6146, 1.305, 0.0065.  
OPS PC36 out of range. Value: 4.1555. Training min, max, SD, explained variance: -4.4792, 3.9684, 1.222, 0.0057.  
Unknown FCFP\_2 feature: 906560188: [\*]:[c](:[\*])Cn(:[\*]):[\*]



$C_{22}H_{24}N_2O_4$

Molecular Weight: 380.43696

ALogP: 3.001

Rotatable Bonds: 8

Acceptors: 4

Donors: 1

### Model Prediction

Prediction: 0.139

Unit: g/kg\_body\_weight

### Model Applicability

Missing features are fingerprint features in the query molecule not found in the training set.

1. All properties and OPS components are within expected ranges.

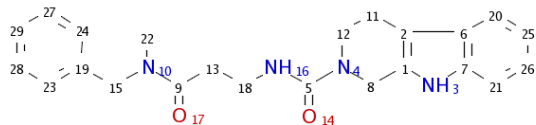

$C_{23}H_{26}N_4O_2$

Molecular Weight: 390.47814

ALogP: 2.702

Rotatable Bonds: 5

Acceptors: 2

Donors: 2

### Model Applicability

Missing features are fingerprint features in the query molecule not found in the training set.

1. OPS PC5 out of range. Value: -7.9239. Training min, max, SD, explained variance: -7.4165, 11.409, 3.374, 0.0435.

### Model Prediction

Prediction: 0.015

Unit: g/kg\_body\_weight





$C_{28}H_{34}N_5O_2$

Molecular Weight: 472.60186

ALogP: 1.567

Rotatable Bonds: 6

Acceptors: 2

Donors: 3

### Model Prediction

Prediction: 0.002

Unit: g/kg\_body\_weight

### Model Applicability

Missing features are fingerprint features in the query molecule not found in the training set.

1. All properties and OPS components are within expected ranges.  
 Unknown FCFP\_2 feature: 10: [\*][NH+]([\*])[\*]  
 Unknown FCFP\_2 feature: -1853714334: [\*]C[NH+](C[\*])C[\*]  
 Unknown FCFP\_2 feature: 1155241219: [\*]CC[NH+]([\*])[\*]

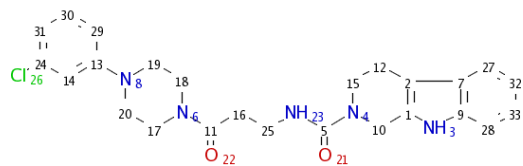

$C_{25}H_{28}ClN_5O_2$

Molecular Weight: 465.97512

ALogP: 3.413

Rotatable Bonds: 4

Acceptors: 3

Donors: 2

### Model Applicability

Missing features are fingerprint features in the query molecule not found in the training set.

1. All properties and OPS components are within expected ranges.

### Model Prediction

Prediction: 0.018

Unit: g/kg\_body\_weight

## MOST ACTIVE.mol



C<sub>25</sub>H<sub>28</sub>FN<sub>2</sub>O

Molecular Weight: 391.50102

ALogP: 3.098

Rotatable Bonds: 5

Acceptors: 1

Donors: 2

## Model Prediction

Prediction: 0.036

Unit: g/kg\_body\_weight

## TOPKAT\_Chronic\_LOAEL

### Model Applicability

Missing features are fingerprint features in the query molecule not found in the training set.

1. All properties and OPS components are within expected ranges.  
Unknown FCFP\_2 feature: 10: [\*][NH+]([\*])[\*]  
Unknown FCFP\_2 feature: -1853714334: [\*]C[NH+](C[\*])C[\*]  
Unknown FCFP\_2 feature: 1155241219: [\*]CC[NH+]([\*])[\*]  
Unknown FCFP\_2 feature: -680623486: [\*][NH+]([\*])[C@H](C)[c](:[\*]):[\*]



$C_{24}H_{27}NO_7$

Molecular Weight: 441.47368

ALogP: 3.388

Rotatable Bonds: 9

Acceptors: 7

Donors: 1

### Model Applicability

Missing features are fingerprint features in the query molecule not found in the training set.

1. OPS PC9 out of range. Value: 4.0669. Training min, max, SD, explained variance: -2.8592, 3.3844, 1.263, 0.0360.

### Model Prediction

Prediction: 0.142

Unit: g/kg\_body\_weight

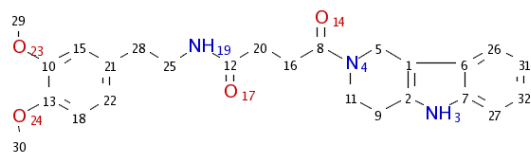

$C_{25}H_{29}N_3O_4$

Molecular Weight: 435.51546

ALogP: 2.831

Rotatable Bonds: 8

Acceptors: 4

Donors: 2

### Model Prediction

Prediction: 0.144

Unit: g/kg\_body\_weight

### Model Applicability

Missing features are fingerprint features in the query molecule not found in the training set.

1. OPS PC9 out of range. Value: 3.9159. Training min, max, SD, explained variance: -2.8592, 3.3844, 1.263, 0.0360.



$C_{29}H_{24}FNO_5$

Molecular Weight: 485.50296

ALogP: 5.695

Rotatable Bonds: 7

Acceptors: 4

Donors: 2

### Model Prediction

Prediction: 0.369

Unit: g/kg\_body\_weight

### Model Applicability

Missing features are fingerprint features in the query molecule not found in the training set.

1. OPS PC9 out of range. Value: 4.3137. Training min, max, SD, explained variance: -2.8592, 3.3844, 1.263, 0.0360.  
OPS PC12 out of range. Value: -2.5269. Training min, max, SD, explained variance: -2.3837, 2.9195, 1.08, 0.0263.



$C_{22}H_{22}N_4O_3$

Molecular Weight: 390.43508

ALogP: 1.807

Rotatable Bonds: 6

Acceptors: 3

Donors: 4

### Model Applicability

Missing features are fingerprint features in the query molecule not found in the training set.

1. All properties and OPS components are within expected ranges.

### Model Prediction

Prediction: 0.328

Unit: g/kg\_body\_weight

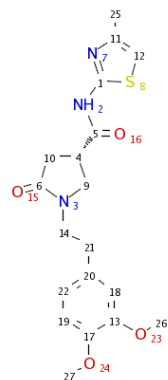

$C_{19}H_{23}N_3O_4S$

Molecular Weight: 389.46862

ALogP: 1.461

Rotatable Bonds: 7

Acceptors: 5

Donors: 1

### Model Prediction

Prediction: 0.034

Unit: g/kg\_body\_weight

### Model Applicability

Missing features are fingerprint features in the query molecule not found in the training set.

1. OPS PC9 out of range. Value: 4.7781. Training min, max, SD, explained variance: -2.8592, 3.3844, 1.263, 0.0360.  
OPS PC14 out of range. Value: 4.5353. Training min, max, SD, explained variance: -2.0624, 3.3586, 1.011, 0.0231.





$C_{23}H_{26}N_2O_6$

Molecular Weight: 426.46234

ALogP: 1.967

Rotatable Bonds: 7

Acceptors: 6

Donors: 1

### Model Prediction

Prediction: 0.123

Unit: g/kg\_body\_weight

### Model Applicability

Missing features are fingerprint features in the query molecule not found in the training set.

1. OPS PC9 out of range. Value: 5.0363. Training min, max, SD, explained variance: -2.8592, 3.3844, 1.263, 0.0360.



$C_{24}H_{27}N_5O_4$

Molecular Weight: 449.50228

ALogP: 1.731

Rotatable Bonds: 9

Acceptors: 6

Donors: 1

### Model Prediction

Prediction: 0.101

Unit: g/kg\_body\_weight

### Model Applicability

Missing features are fingerprint features in the query molecule not found in the training set.

- OPS PC9 out of range. Value: 6.0539. Training min, max, SD, explained variance: -2.8592, 3.3844, 1.263, 0.0360.  
Unknown FCFP\_2 feature: -2049666792: [\*]Cn1:c:[\*]:[\*]:n:1  
Unknown FCFP\_2 feature: -124685461: [\*]1:[\*]:n:c:n:1  
Unknown FCFP\_2 feature: 906560188: [\*]:[c](:[\*])Cn(:[\*]):[\*]



$C_{22}H_{24}N_2O_4$

Molecular Weight: 380.43696

ALogP: 3.001

Rotatable Bonds: 8

Acceptors: 4

Donors: 1

### Model Prediction

Prediction: 0.046

Unit: g/kg\_body\_weight

### Model Applicability

Missing features are fingerprint features in the query molecule not found in the training set.

- OPS PC9 out of range. Value: 3.853. Training min, max, SD, explained variance: -2.8592, 3.3844, 1.263, 0.0360.  
Unknown FCFP\_2 feature: -306856457: [\*]Cn1:c:[\*]:[\*]:[c]:1:[\*]  
Unknown FCFP\_2 feature: -1645149908: [\*]C(=[\*])Cn(:[\*]):[\*]



$C_{23}H_{26}N_4O_2$

Molecular Weight: 390.47814

ALogP: 2.702

Rotatable Bonds: 5

Acceptors: 2

Donors: 2

### Model Prediction

Prediction: 0.069

Unit: g/kg\_body\_weight

### Model Applicability

Missing features are fingerprint features in the query molecule not found in the training set.

1. All properties and OPS components are within expected ranges.



$C_{28}H_{34}N_5O_2$

Molecular Weight: 472.60186

ALogP: 1.567

Rotatable Bonds: 6

Acceptors: 2

Donors: 3

### Model Prediction

Prediction: 0.071

Unit: g/kg\_body\_weight

### Model Applicability

Missing features are fingerprint features in the query molecule not found in the training set.

1. All properties and OPS components are within expected ranges.  
 Unknown FCFP\_2 feature: 10: [\*][NH+]([\*])[\*]  
 Unknown FCFP\_2 feature: -1853714334: [\*]C[NH+](C[\*])C[\*]  
 Unknown FCFP\_2 feature: 1155241219: [\*]CC[NH+]([\*])[\*]



$C_{25}H_{28}ClN_5O_2$

Molecular Weight: 465.97512

ALogP: 3.413

Rotatable Bonds: 4

Acceptors: 3

Donors: 2

### Model Applicability

Missing features are fingerprint features in the query molecule not found in the training set.

1. OPS PC11 out of range. Value: 4.3554. Training min, max, SD, explained variance: -3.8339, 3.875, 1.233, 0.0343.

### Model Prediction

Prediction: 0.117

Unit: g/kg\_body\_weight

## MOST ACTIVE.mol



C<sub>25</sub>H<sub>28</sub>FN<sub>2</sub>O

Molecular Weight: 391.50102

ALogP: 3.098

Rotatable Bonds: 5

Acceptors: 1

Donors: 2

## Model Prediction

Prediction: 0.124

Unit: g/kg\_body\_weight

## TOPKAT\_Rat\_Maximum\_Tolerated\_Dose\_Feed

### Model Applicability

Missing features are fingerprint features in the query molecule not found in the training set.

1. All properties and OPS components are within expected ranges.  
Unknown FCFP\_2 feature: 10: [\*][NH+]([\*])[\*]  
Unknown FCFP\_2 feature: -1853714334: [\*]C[NH+](C[\*])C[\*]  
Unknown FCFP\_2 feature: 1155241219: [\*]CC[NH+]([\*])[\*]  
Unknown FCFP\_2 feature: -680623486: [\*][NH+]([\*])[C@H](C)[c](:[\*]):[\*]



$C_{24}H_{27}NO_7$

Molecular Weight: 441.47368

ALogP: 3.388

Rotatable Bonds: 9

Acceptors: 7

Donors: 1

### Model Prediction

Prediction: 0.004

Unit: g/kg\_body\_weight

### Model Applicability

Missing features are fingerprint features in the query molecule not found in the training set.

1. Molecular\_Weight out of range. Value: 441.47. Training min, max, mean, SD: 68.074, 434.63, 171.13, 85.06.  
Num\_H\_Acceptors out of range. Value: 7. Training min, max, mean, SD: 0, 6, 1.6146, 1.644.  
OPS PC6 out of range. Value: -3.1803. Training min, max, SD, explained variance: -2.4321, 2.9885, 1.256, 0.0488.  
Unknown FCFP\_2 feature: -1678275541: [\*]C(=C(C)[c](:[\*]):[\*]))[\*]





$C_{25}H_{29}N_3O_4$

Molecular Weight: 435.51546

ALogP: 2.831

Rotatable Bonds: 8

Acceptors: 4

Donors: 2

## Model Prediction

Prediction: 0.019

Unit: g/kg\_body\_weight

## Model Applicability

Missing features are fingerprint features in the query molecule not found in the training set.

1. Molecular\_Weight out of range. Value: 435.52. Training min, max, mean, SD: 68.074, 434.63, 171.13, 85.06.  
Num\_AromaticRings out of range. Value: 3. Training min, max, mean, SD: 0, 2, 0.5625, 0.693.  
OPS\_PC6 out of range. Value: -3.0009. Training min, max, SD, explained variance: -2.4321, 2.9885, 1.256, 0.0488.  
Unknown FCFP\_2 feature: 19: [\*]:n:[\*]  
Unknown FCFP\_2 feature: 203707511: [\*]C[c]1:n:[\*]:[\*]:[c]:1[\*]  
Unknown FCFP\_2 feature: 2005402822: [\*][c]1:[\*]:[\*]:[c](:[\*]):n:1  
Unknown FCFP\_2 feature: 907036844: [\*]N([\*])C[c](:[\*]):[\*]  
Unknown FCFP\_2 feature: 307448885: [\*]:c:[c]1:n:[\*]:[\*]:[c]:1:[\*]



$C_{29}H_{24}FNO_5$

Molecular Weight: 485.50296

ALogP: 5.695

Rotatable Bonds: 7

Acceptors: 4

Donors: 2

### Model Prediction

Prediction: 0.000

Unit: g/kg\_body\_weight

### Model Applicability

Missing features are fingerprint features in the query molecule not found in the training set.

1. Molecular\_Weight out of range. Value: 485.5. Training min, max, mean, SD: 68.074, 434.63, 171.13, 85.06.  
 Num\_AromaticRings out of range. Value: 4. Training min, max, mean, SD: 0, 2, 0.5625, 0.693.  
 OPS\_PC1 out of range. Value: 8.058. Training min, max, SD, explained variance: -4.0008, 7.9165, 2.861, 0.2531.  
 OPS\_PC10 out of range. Value: 2.8506. Training min, max, SD, explained variance: -3.9696, 2.3971, 0.982, 0.0298.  
 Unknown FCFP\_2 feature: -1678275541: [\*]C(=C(C)[c]([\*])([\*]))[\*]  
 Unknown FCFP\_2 feature: -1861645784: [\*]:[c]([\*])[c]1:c:[\*]:[\*]:[c]:1:[\*]



$C_{22}H_{22}N_4O_3$

Molecular Weight: 390.43508

ALogP: 1.807

Rotatable Bonds: 6

Acceptors: 3

Donors: 4

### Model Prediction

Prediction: 0.908

Unit: g/kg\_body\_weight

### Model Applicability

Missing features are fingerprint features in the query molecule not found in the training set.

1. Num\_H\_Donors out of range. Value: 4. Training min, max, mean, SD: 0, 3, 0.4375, 0.8311.  
 Num\_AromaticRings out of range. Value: 3. Training min, max, mean, SD: 0, 2, 0.5625, 0.693.  
 Unknown FCFP\_2 feature: 19: [\*]:n:[\*]  
 Unknown FCFP\_2 feature: 2005402822: [\*][c]1:[\*]:[\*]:[c](:[\*]):n:1  
 Unknown FCFP\_2 feature: 1618184456: [\*][c]1:[\*]:[\*]:n:c:1  
 Unknown FCFP\_2 feature: 307448885: [\*]:c:[c]1:n:[\*]:[\*]:[c]:1:[\*]



$C_{19}H_{23}N_3O_4S$

Molecular Weight: 389.46862

ALogP: 1.461

Rotatable Bonds: 7

Acceptors: 5

Donors: 1

### Model Prediction

Prediction: 0.063

Unit: g/kg\_body\_weight

### Model Applicability

Missing features are fingerprint features in the query molecule not found in the training set.

1. OPS PC6 out of range. Value: -2.5908. Training min, max, SD, explained variance: -2.4321, 2.9885, 1.256, 0.0488.  
Unknown FCFP\_2 feature: -1151914249: [\*]N[c]1:n:[\*]:[\*]:s:1



$C_{23}H_{26}N_2O_6$

Molecular Weight: 426.46234

ALogP: 1.967

Rotatable Bonds: 7

Acceptors: 6

Donors: 1

### Model Prediction

Prediction: 0.006

Unit: g/kg\_body\_weight

### Model Applicability

Missing features are fingerprint features in the query molecule not found in the training set.

1. OPS PC6 out of range. Value: -2.7305. Training min, max, SD, explained variance: -2.4321, 2.9885, 1.256, 0.0488.



$C_{24}H_{27}N_5O_4$

Molecular Weight: 449.50228

ALogP: 1.731

Rotatable Bonds: 9

Acceptors: 6

Donors: 1

## Model Prediction

Prediction: 0.002

Unit: g/kg\_body\_weight

## Model Applicability

Missing features are fingerprint features in the query molecule not found in the training set.

1. Molecular\_Weight out of range. Value: 449.5. Training min, max, mean, SD: 68.074, 434.63, 171.13, 85.06.  
Num\_AromaticRings out of range. Value: 3. Training min, max, mean, SD: 0, 2, 0.5625, 0.693.  
OPS\_PC6 out of range. Value: -3.0296. Training min, max, SD, explained variance: -2.4321, 2.9885, 1.256, 0.0488.  
Unknown FCFP\_2 feature: -2049666792: [\*]Cn1:c:[\*]:[\*]:n:1  
Unknown FCFP\_2 feature: -124685461: [\*]1:[\*]:n:c:n:1  
Unknown FCFP\_2 feature: 906560188: [\*]:[c](:[\*])Cn(:[\*]):[\*]



$C_{22}H_{24}N_2O_4$

Molecular Weight: 380.43696

ALogP: 3.001

Rotatable Bonds: 8

Acceptors: 4

Donors: 1

### Model Prediction

Prediction: 0.001

Unit: g/kg\_body\_weight

### Model Applicability

Missing features are fingerprint features in the query molecule not found in the training set.

1. Num\_AromaticRings out of range. Value: 3. Training min, max, mean, SD: 0, 2, 0.5625, 0.693.  
OPS\_PC6 out of range. Value: -3.3568. Training min, max, SD, explained variance: -2.4321, 2.9885, 1.256, 0.0488.  
Unknown FCFP\_2 feature: -306856457: [\*]Cn1:c:[\*]:[\*]:[c]:1:[\*]  
Unknown FCFP\_2 feature: -1549192822: [\*]:[c](:[\*])C(=O)C  
Unknown FCFP\_2 feature: -1645149908: [\*]C(=[\*])Cn(:[\*]):[\*]



$C_{23}H_{26}N_4O_2$

Molecular Weight: 390.47814

ALogP: 2.702

Rotatable Bonds: 5

Acceptors: 2

Donors: 2

### Model Prediction

Prediction: 8.074

Unit: g/kg\_body\_weight

### Model Applicability

Missing features are fingerprint features in the query molecule not found in the training set.

1. Num\_AromaticRings out of range. Value: 3. Training min, max, mean, SD: 0, 2, 0.5625, 0.693.  
 Unknown FCFP\_2 feature: 19: [\*]:n:[\*]  
 Unknown FCFP\_2 feature: 203707511: [\*]C[c]1:n:[\*]:[\*]:[c]:1[\*]  
 Unknown FCFP\_2 feature: 2005402822: [\*][c]1:[\*]:[\*]:[c](:[\*]):n:1  
 Unknown FCFP\_2 feature: 307448885: [\*]:c:[c]1:n:[\*]:[\*]:[c]:1:[\*]  
 Unknown FCFP\_2 feature: 907036844: [\*]N([\*])C[c](:[\*]):[\*]





$C_{28}H_{34}N_5O_2$

Molecular Weight: 472.60186

ALogP: 1.567

Rotatable Bonds: 6

Acceptors: 2

Donors: 3

## Model Prediction

Prediction: 26.912

Unit: g/kg\_body\_weight

## Model Applicability

Missing features are fingerprint features in the query molecule not found in the training set.

1. Molecular\_Weight out of range. Value: 472.6. Training min, max, mean, SD: 68.074, 434.63, 171.13, 85.06.  
 Num\_AromaticRings out of range. Value: 3. Training min, max, mean, SD: 0, 2, 0.5625, 0.693.  
 Unknown FCFP\_2 feature: 19: [\*]:n:[\*]  
 Unknown FCFP\_2 feature: 10: [\*][NH+]([\*])[\*]  
 Unknown FCFP\_2 feature: 203707511: [\*]C[c]1:n:[\*]:[\*]:[c]:1[\*]  
 Unknown FCFP\_2 feature: 2005402822: [\*][c]1:[\*]:[\*]:[c](:[\*]):n:1  
 Unknown FCFP\_2 feature: 307448885: [\*]:c:[c]1:n:[\*]:[\*]:[c]:1:[\*]  
 Unknown FCFP\_2 feature: 907036844: [\*]N([\*])C[c](:[\*]):[\*]  
 Unknown FCFP\_2 feature: -1853714334: [\*]C[NH+](C[\*])C[\*]  
 Unknown FCFP\_2 feature: 1155241219: [\*]CC[NH+]([\*])[\*]

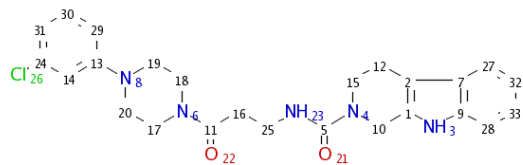

$C_{25}H_{28}ClN_5O_2$

Molecular Weight: 465.97512

ALogP: 3.413

Rotatable Bonds: 4

Acceptors: 3

Donors: 2

## Model Prediction

Prediction: 0.002

Unit: g/kg\_body\_weight

## Model Applicability

Missing features are fingerprint features in the query molecule not found in the training set.

1. Molecular\_Weight out of range. Value: 465.98. Training min, max, mean, SD: 68.074, 434.63, 171.13, 85.06.  
Num\_AromaticRings out of range. Value: 3. Training min, max, mean, SD: 0, 2, 0.5625, 0.693.  
OPS\_PC10 out of range. Value: 2.7252. Training min, max, SD, explained variance: -3.9696, 2.3971, 0.982, 0.0298.  
Unknown FCFP\_2 feature: 19: [\*]:n:[\*]  
Unknown FCFP\_2 feature: 203707511: [\*]C[c]1:n:[\*]:[\*]:[c]:1[\*]  
Unknown FCFP\_2 feature: 2005402822: [\*][c]1:[\*]:[\*]:[c](:[\*]):n:1  
Unknown FCFP\_2 feature: 307448885: [\*]:c:[c]1:n:[\*]:[\*]:[c]:1:[\*]  
Unknown FCFP\_2 feature: 907036844: [\*]N([\*])C[c](:[\*]):[\*]

## MOST ACTIVE.mol



C<sub>25</sub>H<sub>28</sub>FN<sub>2</sub>O

Molecular Weight: 391.50102

ALogP: 3.098

Rotatable Bonds: 5

Acceptors: 1

Donors: 2

## Model Prediction

Prediction: 0.016

Unit: g/kg\_body\_weight

## TOPKAT\_Rat\_Maximum\_Tolerated\_Dose\_Gavage

### Model Applicability

Missing features are fingerprint features in the query molecule not found in the training set.

1. Num\_AromaticRings out of range. Value: 3. Training min, max, mean, SD: 0, 2, 0.5625, 0.693.  
OPS\_PC7 out of range. Value: -3.4465. Training min, max, SD, explained variance: -2.8003, 2.9332, 1.16, 0.0416.  
Unknown FCFP\_2 feature: 10: [\*][NH+]([\*])[\*]  
Unknown FCFP\_2 feature: -1853714334: [\*]C[NH+](C[\*])C[\*]  
Unknown FCFP\_2 feature: 1155241219: [\*]CC[NH+]([\*])[\*]  
Unknown FCFP\_2 feature: -680623486: [\*][NH+]([\*])[C@H](C)[c]([\*]):[\*]



C<sub>24</sub>H<sub>27</sub>NO<sub>7</sub>

Molecular Weight: 441.47368

ALogP: 3.388

Rotatable Bonds: 9

Acceptors: 7

Donors: 1

### Model Applicability

Missing features are fingerprint features in the query molecule not found in the training set.

1. OPS PC34 out of range. Value: 9.6064. Training min, max, SD, explained variance: -6.4714, 7.7587, 1.869, 0.0070.

### Model Prediction

Prediction: 4.097

Unit: g/kg\_body\_weight



$C_{25}H_{29}N_3O_4$

Molecular Weight: 435.51546

ALogP: 2.831

Rotatable Bonds: 8

Acceptors: 4

Donors: 2

### Model Applicability

Missing features are fingerprint features in the query molecule not found in the training set.

1. OPS PC26 out of range. Value: 12.838. Training min, max, SD, explained variance: -7.9646, 10.26, 2.09, 0.0088.

### Model Prediction

Prediction: 27.191

Unit: g/kg\_body\_weight



$C_{29}H_{24}FNO_5$

Molecular Weight: 485.50296

ALogP: 5.695

Rotatable Bonds: 7

Acceptors: 4

Donors: 2

### Model Prediction

Prediction: 0.252

Unit: g/kg\_body\_weight

### Model Applicability

Missing features are fingerprint features in the query molecule not found in the training set.

1. OPS PC39 out of range. Value: -8.5916. Training min, max, SD, explained variance: -6.2305, 6.7137, 1.769, 0.0063.



C<sub>22</sub>H<sub>22</sub>N<sub>4</sub>O<sub>3</sub>

Molecular Weight: 390.43508

ALogP: 1.807

Rotatable Bonds: 6

Acceptors: 3

Donors: 4

### Model Applicability

Missing features are fingerprint features in the query molecule not found in the training set.

1. All properties and OPS components are within expected ranges.

### Model Prediction

Prediction: 32.394

Unit: g/kg\_body\_weight



$C_{19}H_{23}N_3O_4S$

Molecular Weight: 389.46862

ALogP: 1.461

Rotatable Bonds: 7

Acceptors: 5

Donors: 1

### Model Applicability

Missing features are fingerprint features in the query molecule not found in the training set.

1. OPS PC19 out of range. Value: -5.9332. Training min, max, SD, explained variance: -5.2853, 15.143, 2.34, 0.0110.

### Model Prediction

Prediction: 14.820

Unit: g/kg\_body\_weight





$C_{23}H_{26}N_2O_6$

Molecular Weight: 426.46234

ALogP: 1.967

Rotatable Bonds: 7

Acceptors: 6

Donors: 1

### Model Prediction

Prediction: 26.757

Unit: g/kg\_body\_weight

### Model Applicability

Missing features are fingerprint features in the query molecule not found in the training set.

1. OPS PC33 out of range. Value: 7.8436. Training min, max, SD, explained variance: -7.1323, 7.6992, 1.899, 0.0072.  
OPS PC35 out of range. Value: -7.4244. Training min, max, SD, explained variance: -7.3188, 9.6186, 1.858, 0.0069.



$C_{24}H_{27}N_5O_4$

Molecular Weight: 449.50228

ALogP: 1.731

Rotatable Bonds: 9

Acceptors: 6

Donors: 1

### Model Applicability

Missing features are fingerprint features in the query molecule not found in the training set.

1. OPS PC35 out of range. Value: -7.6474. Training min, max, SD, explained variance: -7.3188, 9.6186, 1.858, 0.0069.

### Model Prediction

Prediction: 26.742

Unit: g/kg\_body\_weight



C<sub>22</sub>H<sub>24</sub>N<sub>2</sub>O<sub>4</sub>

Molecular Weight: 380.43696

ALogP: 3.001

Rotatable Bonds: 8

Acceptors: 4

Donors: 1

### Model Applicability

Missing features are fingerprint features in the query molecule not found in the training set.

1. OPS PC26 out of range. Value: 12.881. Training min, max, SD, explained variance: -7.9646, 10.26, 2.09, 0.0088.

### Model Prediction

Prediction: 8.151

Unit: g/kg\_body\_weight



$C_{23}H_{26}N_4O_2$

Molecular Weight: 390.47814

ALogP: 2.702

Rotatable Bonds: 5

Acceptors: 2

Donors: 2

### Model Applicability

Missing features are fingerprint features in the query molecule not found in the training set.

1. All properties and OPS components are within expected ranges.

### Model Prediction

Prediction: 5.277

Unit: g/kg\_body\_weight



$C_{28}H_{34}N_5O_2$

Molecular Weight: 472.60186

ALogP: 1.567

Rotatable Bonds: 6

Acceptors: 2

Donors: 3

### Model Prediction

Prediction: 5.145

Unit: g/kg\_body\_weight

### Model Applicability

Missing features are fingerprint features in the query molecule not found in the training set.

1. All properties and OPS components are within expected ranges.  
 Unknown FCFP\_2 feature: 10: `[*][NH+]([*])[*]`  
 Unknown FCFP\_2 feature: -1853714334: `[*]C[NH+](C[*])C[*]`  
 Unknown FCFP\_2 feature: 1155241219: `[*]CC[NH+]([*])[*]`



$C_{25}H_{28}ClN_5O_2$

Molecular Weight: 465.97512

ALogP: 3.413

Rotatable Bonds: 4

Acceptors: 3

Donors: 2

### Model Applicability

Missing features are fingerprint features in the query molecule not found in the training set.

1. All properties and OPS components are within expected ranges.

### Model Prediction

Prediction: 2.972

Unit: g/kg\_body\_weight

## MOST ACTIVE.mol



C<sub>25</sub>H<sub>28</sub>FN<sub>2</sub>O

Molecular Weight: 391.50102

ALogP: 3.098

Rotatable Bonds: 5

Acceptors: 1

Donors: 2

## Model Prediction

Prediction: 1.230

Unit: g/kg\_body\_weight

## TOPKAT\_Rat\_Oral\_LD50

### Model Applicability

Missing features are fingerprint features in the query molecule not found in the training set.

1. All properties and OPS components are within expected ranges.  
Unknown FCFP\_2 feature: 10: [\*][NH+]([\*])[\*]  
Unknown FCFP\_2 feature: -1853714334: [\*]C[NH+](C[\*])C[\*]  
Unknown FCFP\_2 feature: 1155241219: [\*]CC[NH+]([\*])[\*]  
Unknown FCFP\_2 feature: -680623486: [\*][NH+]([\*])[C@H](C)[c](:[\*]):[\*]
